RESEARCH ARTICLE

# Interventions that effectively target *Anopheles funestus* mosquitoes could significantly improve control of persistent malaria transmission in south-eastern Tanzania

Emmanuel W. Kaindoa<sup>1,2\*</sup>, Nancy S. Matowo<sup>1,3</sup>, Halfan S. Ngowo<sup>1,4</sup>, Gustav Mkandawile<sup>1</sup>, Arnold Mmbando<sup>1,5</sup>, Marcelina Finda<sup>1</sup>, Fredros O. Okumu<sup>1,2,4</sup>

**1** Ifakara Health Institute, Environmental Health and Ecological Sciences Thematic Group, Morogoro, Tanzania, **2** University of the Witwatersrand, School of Public Health, Faculty of Health Science, Johannesburg, South Africa, **3** Wits Research Institute for Malaria, School of Pathology, Faculty of Health Sciences, University of the Witwatersrand, Johannesburg, South Africa, **4** Institute of Biodiversity, Animal Health and Comparative Medicine, G12 8QQ, University of Glasgow, Glasgow, United Kingdom, **5** Swiss Tropical and Public Health Institute, University of Basel, Basel, Switzerland

\* [ekaindoa@ihi.or.tz](mailto:ekaindoa@ihi.or.tz)

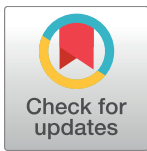

OPEN ACCESS

**Citation:** Kaindoa EW, Matowo NS, Ngowo HS, Mkandawile G, Mmbando A, Finda M, et al. (2017) Interventions that effectively target *Anopheles funestus* mosquitoes could significantly improve control of persistent malaria transmission in south-eastern Tanzania. PLoS ONE 12(5): e0177807. <https://doi.org/10.1371/journal.pone.0177807>

**Editor:** Basil Brooke, National Institute for Communicable Diseases, SOUTH AFRICA

**Received:** November 22, 2016

**Accepted:** May 3, 2017

**Published:** May 18, 2017

**Copyright:** © 2017 Kaindoa et al. This is an open access article distributed under the terms of the [Creative Commons Attribution License](https://creativecommons.org/licenses/by/4.0/), which permits unrestricted use, distribution, and reproduction in any medium, provided the original author and source are credited.

**Data Availability Statement:** The relevant data are within the paper and its Supporting Information file.

**Funding:** EK was supported by Wellcome Trust and the Association of Physicians of Great Britain and Ireland for funding this research (Grant Number: 100540/Z/12/Z), EK is also supported by the Consortium for Advanced Research Training in Africa (CARTA), which is jointly led by the African

## Abstract

Malaria is transmitted by many *Anopheles* species whose proportionate contributions vary across settings. We re-assessed the roles of *Anopheles arabiensis* and *Anopheles funestus*, and examined potential benefits of species-specific interventions in an area in south-eastern Tanzania, where malaria transmission persists, four years after mass distribution of long-lasting insecticide-treated nets (LLINs). Monthly mosquito sampling was done in randomly selected households in three villages using CDC light traps and back-pack aspirators, between January-2015 and January-2016, four years after the last mass distribution of LLINs in 2011. Multiplex polymerase chain reaction (PCR) was used to identify members of *An. funestus* and *Anopheles gambiae* complexes. Enzyme-linked immunosorbent assay (ELISA) was used to detect *Plasmodium* sporozoites in mosquito salivary glands, and to identify sources of mosquito blood meals. WHO susceptibility assays were done on wild caught female *An. funestus* s.l., and physiological ages approximated by examining mosquito ovaries for parity. A total of 20,135 *An. arabiensis* and 4,759 *An. funestus* were collected. The *An. funestus* group consisted of 76.6% *An. funestus* s.s, 2.9% *An. rivulorum*, 7.1% *An. leesonii*, and 13.4% unamplified samples. Of all mosquitoes positive for *Plasmodium*, 82.6% were *An. funestus* s.s, 14.0% were *An. arabiensis* and 3.4% were *An. rivulorum*. *An. funestus* and *An. arabiensis* contributed 86.21% and 13.79% respectively, of annual entomological inoculation rate (EIR). *An. arabiensis* fed on humans (73.4%), cattle (22.0%), dogs (3.1%) and chicken (1.5%), but *An. funestus* fed exclusively on humans. The *An. funestus* populations were 100% susceptible to organophosphates, pirimiphos methyl and malathion, but resistant to permethrin (10.5% mortality), deltamethrin (18.7%), lambda-cyhalothrin (18.7%) and DDT (26.2%), and had reduced susceptibility to bendiocarb (95%) and propoxur (90.1%). Parity rate was higher in *An. funestus* (65.8%) than *An. arabiensis* (44.1%). Though *An. arabiensis* is still the most abundant vector species here, the

Population and Health Research Center and the University of the Witwatersrand and funded by the Wellcome Trust (UK) (Grant No: 087547/Z/08/Z), the Carnegie Corporation of New York (Grant No–B 8606.R02), Sida (Grant No:54100029), NSM received financial supports from Wellcome Masters Fellowship, Grant number: WT104029/Z/14/Z. FOO is also supported by a Wellcome Trust Intermediate Research Fellowship (Grant number: WT102350/Z/13/Z) and a grant from World Health Organization, Special Program for Research and Training in Tropical Diseases (Grant No. B40445). The funders had no role in study design, data collection and analysis, decision to publish, or preparation of the manuscript.

**Competing interests:** The authors have declared that no competing interests exist.

remaining malaria transmission is predominantly mediated by *An. funestus*, possibly due to high insecticide resistance and high survival probabilities. Interventions that effectively target *An. funestus* mosquitoes could therefore significantly improve control of persistent malaria transmission in south–eastern Tanzania.

## Background

Malaria continues to be one of the most significant mosquito-borne parasitic diseases, affecting about 212 million people, causing 429,000 deaths annually [1], and adversely affect socio-economic development in sub-Saharan African countries [2]. The World Health Organization (WHO) estimates that there has been a decline in malaria burden, and that morbidity worldwide reduced by 21% and mortality by 29% between 2010 and 2015, but sub-Saharan Africa still accounts for approximately 92% of all malaria deaths and cases [1]

Tanzania has experienced a decline in malaria transmission following the introduction of insecticide treated nets (ITNs) and the scale-up of long-lasting insecticide treated nets (LLINs) [3]. By 2010, the country had made significant progress, and most areas that were experiencing prevalence above 50% in 2000, now had below 10% prevalence [4]. However, the most recent malaria indicator survey has returned an average prevalence of 14.8% prevalence in children under 5 years in Tanzania [5]. Getting to zero transmission therefore remains a major challenge, mainly because the persistent malaria transmission is mediated by mosquitoes that are not adequately responsive to control by existing indoor insecticidal interventions, such as LLINs and indoor residual spraying (IRS). The Tanzanian National Malaria Control Program is aiming at cutting down malaria transmission to 1% by 2020 [6], thus the need for new complementary approaches is even more urgent.

Despite the high coverage of LLINs, high indoor densities of potentially infectious mosquitoes remain common in some places [7, 8]. Evidence suggests that indoor densities of major malaria vectors such as *An. funestus* and *An. arabiensis* depend on house design features, environmental conditions and demographic composition [8, 9]. Previous studies have reported high levels of resistance in *An. funestus* to pyrethroids in Tanzania [10] and elsewhere in East Africa [11–13]. *An. funestus* is one of the major malaria vectors in Africa and is widely distributed across the continent [14, 15]. The species is highly anthropophilic and endophilic, with higher vectorial capacity than most other vector species [14, 16]. The *An. funestus* group includes several sibling species, which are difficult to distinguish morphologically, but can be separated by polymerase chain reaction (PCR) using a cocktail of species-specific primers [17]. Previous studies in Tanzania have reported presence of four member species in the *An. funestus* group, namely *An. funestus* s.s, *An. rivulorum*, *An. lesoni* and *An. parensis* [18]. All the four members of the *An. funestus* group have been found positive for *P. falciparum* though the infection rates are often higher in the predominantly anthropophilic *An. funestus* s.s than the rest. The importance of this vector is increasingly associated with the persistent malaria transmission [8, 10], and it has been suggested that it could be responsible for resurgence of malaria transmission in rural Tanzania [10].

In this study, we assessed contributions of residual populations of major malaria vectors, *An. arabiensis* and *An. funestus*, in endemic villages in rural south-eastern Tanzania, where the last mass distribution of LLINs prior to our study had been completed in 2011 [19]. The study assessed prevalence of *Plasmodium* sporozoites in the vector species, survival rates of these vectors, and their resistance status to examine what factors might be mediating the role of these

two major species in the ongoing malaria transmission. Inferences are made with regard to what would happen if appropriate species-specific interventions were deployed in this and similar settings. More specifically, interventions that effectively target mosquito species mediating most of the remnant malaria transmission should result in extensive declines in the transmission. Where one vector species dominates the transmission system, approaches against such vectors may offer opportunities to sufficiently disrupt local malaria transmission.

## Methods

### Study area

The study was conducted in three villages in the Kilombero floodplains in Ulanga district, south-eastern Tanzania (Fig 1). This area is perennially meso-endemic for malaria and has high mosquito densities throughout the year, peaking between January and May. Annual rainfall and temperatures range from 1200 to 1800 mm and 20°C to 32.6°C respectively. Malaria vector species in the area comprise primarily of the *An. gambiae s.l* (almost exclusively consisting of *An. arabiensis*), and *An. funestus* group. Several other *Anopheles* mosquitoes such as *An. coustani*, *An. pharoensis*, *An. squamosus*, *An. ziemanni* and *An. wellcomei* are also found, as well as several culicine species, mainly *Mansonia* mosquitoes, *Aedes* mosquitoes and *Culex* species. The major vector control intervention in this area is LLINs [19], and the last mass-distribution of nets, prior to this study had been conducted between 2010 and 2011 [19].

### Study procedures

This study was part of a high-resolution longitudinal mosquito surveillance program, where we collected host-seeking and indoor-resting mosquitoes between January 2015 and January 2016, in randomly selected households, and also selected sentinel households within the Health and Demographic Surveillance System (HDSS) maintained by Ifakara Health Institute in the study area [20].

**Monitoring indoor densities of host-seeking and resting disease-transmitting mosquitoes.** Firstly, 1600 households were randomly selected from the HDSS households database in three study villages of Kivukoni, Minepa and Mavimba, and assigned to 16 geographical clusters each consisting of 100 households. The sampling clusters were assigned based on household latitudes so that clusters 1–16 were arranged in a north-south direction in the study area. From each geographical cluster, six households were selected for sampling. These included three households randomly selected on monthly basis, and another three households that were fixed as sentinel households, visited repeatedly every month. This way, 96 households were studied per month, each time consisting of 48 sentinel households across the study area, and 48 new households randomly selected each month. Geo-positions of all the households were recorded using hand held GPS receivers (Magellan eXplorist 110). Each household was visited only once each month, and mosquitoes were sampled from one room with occupant(s) sleeping under mosquito nets, using miniature Centre for Disease Control (CDC) light traps set near occupied bed nets at the foot end, at approximately 1.5 m from the ground [21, 22]. The traps were operated from 18:00 to 06:00 each night.

Indoor resting mosquitoes were collected using a backpack aspirator [23] from the walls, bed nets and floors in same households where the CDC light trap catches were conducted. Aspiration of resting mosquitoes was conducted for approximately 15 minutes in each household. Each morning, the collected mosquitoes were killed in a closed container using alcohol. The mosquitoes were identified morphologically and sorted by taxa and sex before they were identified by PCR. The identification was done following the taxonomic key developed by Gillies and Coetzee, i.e. Keys for the *Anopheles* of Africa, south of Sahara [24].

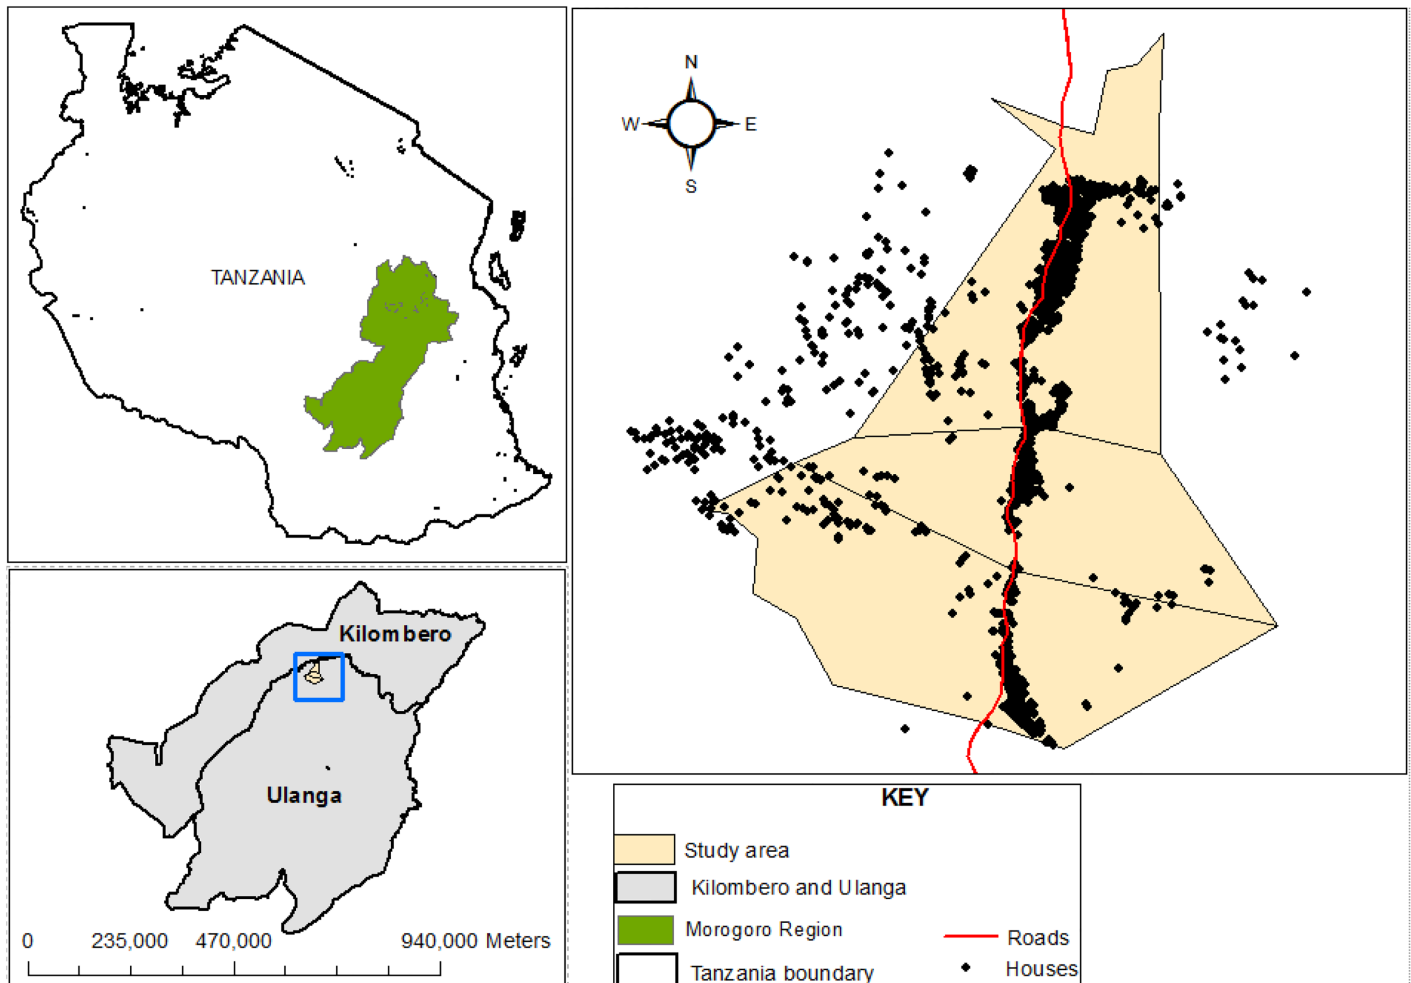

**Fig 1. Map of the study area, showing the villages and households in Ulanga district where the study was conducted.**

<https://doi.org/10.1371/journal.pone.0177807.g001>

**Identification of sibling species and detection of *Plasmodium* infection in malaria vectors.** All female *An. gambiae* complex mosquitoes, were examined by multiplex polymerase chain reaction (PCR) technique as described by Scott *et al.* [18] to distinguish sibling species. Similarly, all samples of *An. funestus* were examined by PCR, using techniques developed by Koekemoer *et al.* [25] and Cohuet *et al.* [26] to distinguish sibling species. All *Anopheles* mosquitoes caught were segregated by species and examined in pools by enzyme-linked immunosorbent assays (ELISA), to detect *Plasmodium* sporozoites in their salivary glands [27]. To avoid false positives, the ELISA lysates were boiled for 10 minutes at 100°C, effectively eliminating heat-labile non *Plasmodium falciparum* protozoan antigens [28]. We assessed all the collected *Anopheles gambiae* s.l and *Anopheles funestus* s.l mosquitoes by ELISA, using heads and thoraces. However, only a sub-sample was assessed by PCR for species identification, using legs.

**Identification of mosquito blood meals.** Blood meal analysis was also done on a sub-sample, working only with the mosquitoes that were blood-fed. Each mosquito abdomen was separated from the thorax and homogenized in phosphate buffer saline (PBS) following the method described by Beier *et al.* [29]. This way, all the blood-fed mosquitoes were screened for human, bovine, chicken, goat and dog blood using ELISA.

**Assessment of insecticide susceptibility and parity rates.** The insecticide susceptibility tests were conducted using standard WHO guidelines [30]. Insectary-reared *An. gambiae* s.s (Ifakara strain) was used as a reference susceptible population. Because of the difficulties in finding *An. funestus* larvae in the study area, adult female mosquitoes were collected indoors from April to July 2016, by CDC light traps from the same households in three villages. The mosquitoes were transferred into netting cages and maintained on 10% glucose solution. *An. funestus* mosquitoes were then separated from other mosquito species by gently sucking them from the cages into a small-netting cage using mouth aspirators and all other mosquito species were killed.

Non blood-fed adult *An. funestus* s.l females were therefore exposed to 0.75% permethrin, 0.05% deltamethrin, 0.05% lambda cyhalothrin, 4% dieldrin, 4% DDT, 0.1% bendiocarb, 0.1% propoxur, 0.25% pirimiphos methyl, and 1% malathion, as recommended by the WHO. Up to 100 adult females of unknown age were exposed to each insecticide during the experiment, including at least four replicates. In each test, mosquitoes collected from the same villages at the same time were exposed to oil impregnated papers, constituting additional controls. The number of knocked-down mosquitoes in each tube was counted and recorded after 10, 15, 20, 30, 40, 50 and 60 minutes. After one hour of exposure, mosquitoes were transferred to the holding tubes and maintained on 10% sugar solution then monitored for survival and mortality after 24 hours. The post exposure observation was conducted after 80 minutes only if the knockdown was less than 80% [30].

Physiological age of the wild-caught female malaria vectors was approximated based on the status of their ovaries, i.e. whether they had previously laid eggs or not [31]. Abdomens of a randomly selected sub-samples of unfed female *An. funestus* and *An. arabiensis* collected from the selected households were dissected for parity [32]. Each unfed female mosquito was first anesthetized in a refrigerator. A drop of distilled water was added to a slide and each specimen kept still on the slide, then the seventh and eighth abdominal segment was pulled using a fine needle under a stereo dissecting microscope. The ovarian tracheoles were then observed under a compound microscope at 10X magnification, to determine whether they were parous or nulliparous [31].

## Data analysis

Statistical analyses were carried out using R statistical software version 3.3.1 [33]. Mosquito abundance was over-dispersed so we modeled it following a negative binomial distribution using the generalized linear mixed model automatic differentiation model builder (glmmADMB) package [34] with log link function. Here, mosquito abundance (nightly total count) were treated as response variable while locality (villages) were treated as fixed effect.

*Plasmodium* infection rates and blood meal sources of malaria vectors were estimated as percentages of total mosquitoes assayed. Similarly, observed mean mortality after 24 hours of exposure to each insecticide was calculated as percentage of total mosquitoes exposed in all four exposure replicates [30]. The insecticide susceptibility test findings were interpreted according to WHO guidelines [30].

The EIR was calculated as a function of biting rates and proportion of tested mosquitoes infected with sporozoites. Since we initially calculated these biting rates for each trap night, the EIR was adjusted by multiplying the daily EIR values by 365 nights (Annual EIR = Nightly biting rate x Sporozoite rate x 365). We relied on values comparative trap evaluations done in the same study area, where CDC light traps had been directly compared to human landing catches inside households [35]. Those earlier trials had indicated that CDC light traps consistently caught 0.3 times as many *An. gambiae* s.l as human landing catches, and 0.68 times as many

*An. funestus* mosquitoes as human landing catches [35]. In this current study, we have therefore adjusted the CDC light trap catches using these coefficients, but also presented the unadjusted results.

## Ethical considerations

Meetings with local leaders were held in the study areas and the main aims of the study were explained by the scientists. Permission to conduct studies in the separate villages was obtained from respective leaders of each of the villages; Mr. Ayubu Salila, Mr. Kiluka Mdumba and Mr. Baalesa Ligola for Kivukoni, Minepa and Mavimba villages respectively. I confirm that the field studies did not involve endangered or protected species. A written and signed informed consent was obtained from each household head participating in the study. All information was given in Kiswahili, the local language. All the households were provided and protected by intact LLINs (Olyset<sup>®</sup> nets) as previously distributed by the universal bednets coverage campaign [36]. Ethical approval for the study was obtained from Ifakara Health Institute Institutional Review Board (IHI/IRB/No: 34–2014), and the Medical Research Coordination Committee of the National Institute of Medical Research (Certificate No.NIMR/HQ/R.8a/Vol. IX1903).

## Results

### Indoor densities of *Anopheles* mosquitoes in the area

A total of 25670 *Anopheles* mosquitoes were collected by CDC light trap and back pack aspirator, comprising *An. funestus* s.l (18.7%) and *An. gambiae* s.l, which in turn comprised of *An. arabiensis* sibling species (79.0%), *An. pharoensis* (0.5%), *An. squamosus* (0.4%), *An. ziemanni* (0.3%) and *An. wellcomei* (0.4%). The highest densities, i.e. 54% and 65% of all *An. arabiensis* and 65% of all *An. funestus* were observed in the middle of study area, i.e. Minepa village. Densities of *An.* peaked between May, while the density of *An. funestus* peaked in February and May, one month after onset of the long rainy season, which is the main malaria transmission season. The lowest vector densities were observed between September and November (Fig 2).

### Sibling species of malaria vectors and *Plasmodium* infection rates

A total of 20,135 *An. gambiae* s.l and 4,759 *An. funestus* s.l mosquitoes were assayed in the laboratory by PCR or ELISA or both. All the *An. gambiae* s.l. mosquitoes tested by PCR were confirmed to be *An. arabiensis* (100%). On the other hand, the *An. funestus* group consisted of 76.6% *An. funestus* s.s, 2.9% *An. rivulorum*, 7.1% *An. leesoni*, and 13.4% unamplified samples. Monthly variations of proportions of the *An. funestus* sibling species is shown in Fig 3.

The CDC-light trap catches were used to estimate malaria transmission densities as Entomological Inoculation Rates (EIR) as shown in Table 1. Infection rates were higher in *An. funestus* than *An. arabiensis*. Using unadjusted estimates, the overall EIR (bites per person per year) was 9.19, of which *An. funestus* contributed 86.21%, while *An. arabiensis* contributed 13.79% (Table 1). However, when considering estimates adjusted on the basis of relative efficiencies of CDC light traps compared to Human Landing Catches, the overall EIR (bites per person per year) was 15.87, of which *An. funestus* contributed 73.39%, while *An. arabiensis* contributed 26.61% (Table 1). The highest sporozoite rate among *An. funestus* was in April, when 13.79% towards the transmission. Nightly biting rate among *An. funestus* was highest in May, i.e. 344 bites/month, while the highest biting rate in *An. arabiensis* was 2090 bites/month in the same month (Table 2). Of all *An. funestus* s.l mosquitoes that tested positive for malaria

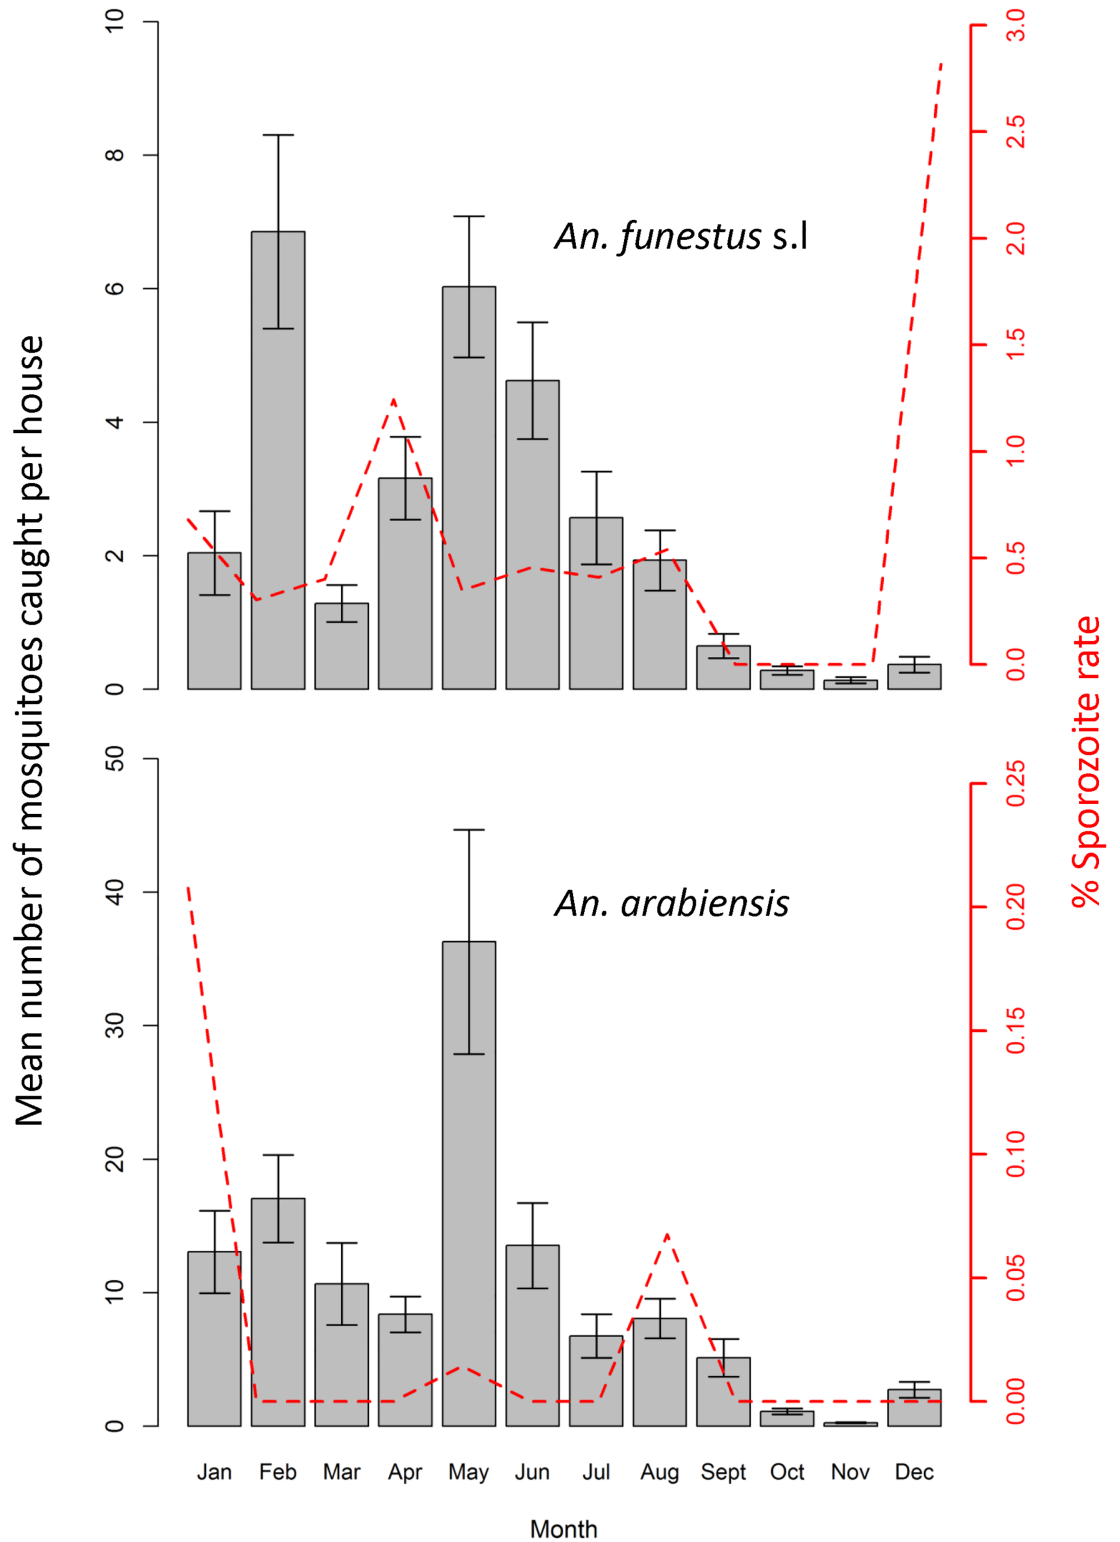

**Fig 2. Mean number of *Anopheles funestus* s.l and *Anopheles arabiensis* mosquitoes caught per house per night.** Y error bars represent the 2-standard errors of the mean.

<https://doi.org/10.1371/journal.pone.0177807.g002>

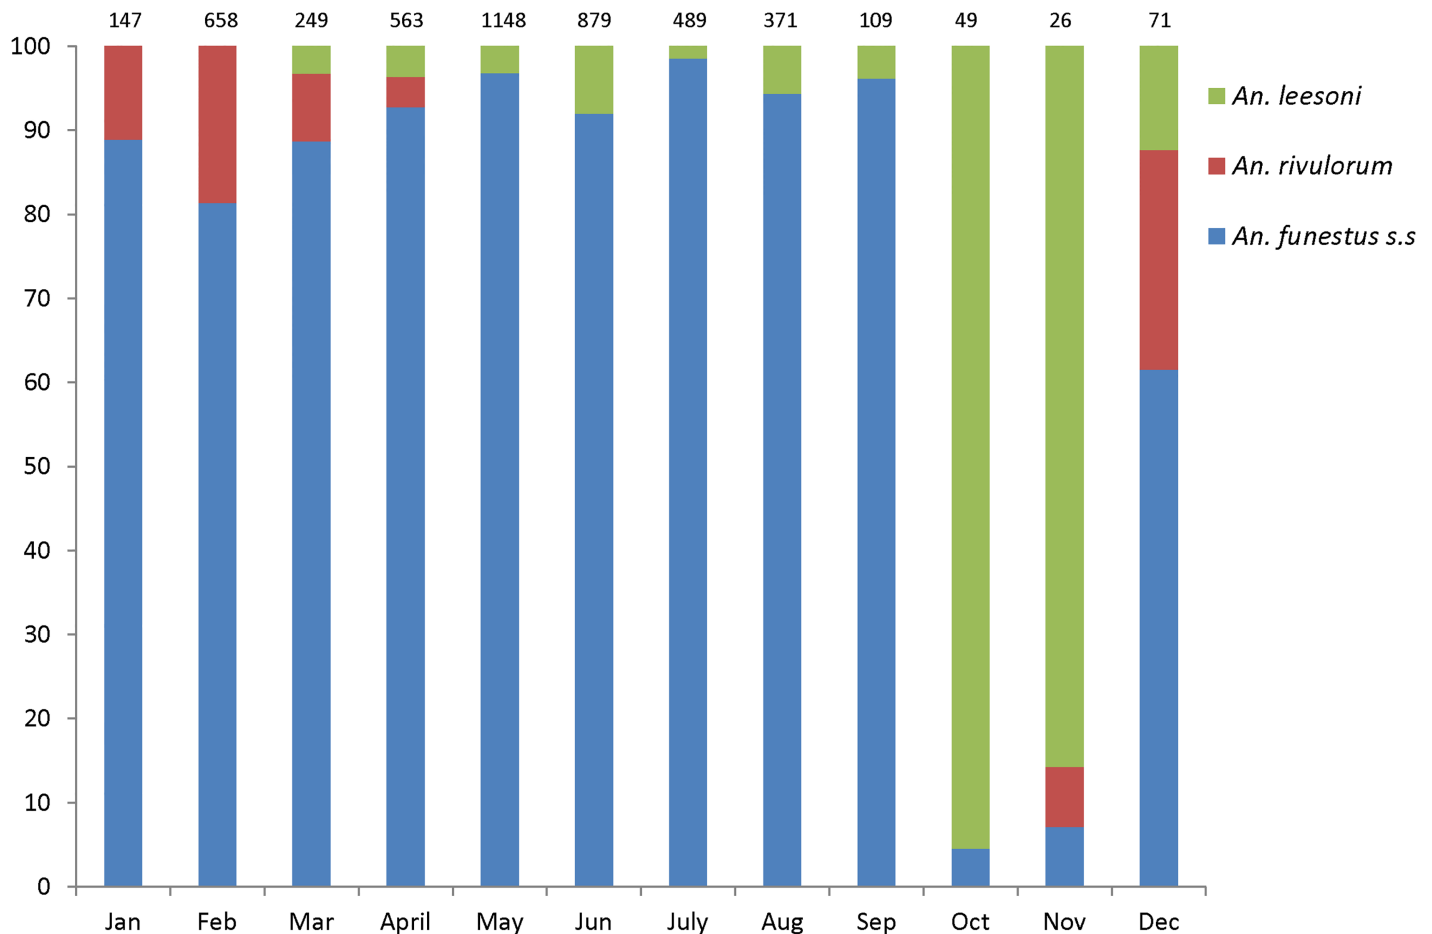

**Fig 3. Monthly variations in the composition of sibling species of *Anopheles funestus* group in the study area.**

<https://doi.org/10.1371/journal.pone.0177807.g003>

parasites, 96% were *An. funestus* s.s, the remaining 4% being *An. rivulorum*. None of the *An. lesoni* tested positive for *Plasmodium* sporozoites.

### Indoor densities of Culicine mosquitoes in the area

A total of 103,382 Culicine mosquitoes, comprising of 100,047 *Culex* (96.7%), 3197 *Mansonia* (3.1%) and 138 *Aedes* mosquitoes (0.1%). Of all the *Culex* mosquitoes collected, males contributed 76.3%, while females contributed 23.7%. For *Mansonia*, males contributed 58.6% while females contributed 41.4%. Lastly, *Aedes* males contributed 26.1% while females were 73.9%.

### Mosquito blood meal sources

A total of 82 mosquitoes that were identified by PCR also had blood meals in their abdomen, so these were assessed by way of blood-meal ELISA. These included 64 *An. arabiensis*, 17 *An. funestus* s.s, and 1 *An. lesoni*. The study identified a broad spectrum of host blood antigens, mostly humans (79.2%), followed by cattle (17.1%), dogs (2.4%) and chicken (1.2%). The analysis did not detect any mixed blood meals. The results for mosquito blood meals are summarized in Table 3.



**Table 1. Infectious status of malaria vectors and dominant contribution of *Anopheles funestus* mosquitoes to ongoing malaria transmission, despite their low abundance relative to *Anopheles arabiensis*.**

|                                                                                                     | <i>Anopheles arabiensis</i> | <i>Anopheles funestus</i> s.l |
|-----------------------------------------------------------------------------------------------------|-----------------------------|-------------------------------|
| Total number of mosquitoes collected by CDC Light Trap (January 2015 to January 2016)               | 20135                       | 4759                          |
| Total number of trap nights                                                                         | 1152                        | 1152                          |
| Biting rate per night                                                                               | 17.48                       | 4.13                          |
| Relative efficiency (CDC-LT) relative to HLC (Derived from Okumu et al 2008 [38])                   | 0.3                         | 0.68                          |
| Corrected biting rate                                                                               | 58.26                       | 6.08                          |
| Total number of mosquitoes analysed for <i>Plasmodium falciparum</i> circumsporozoite protein (CSP) | 20135                       | 4759                          |
| Total number of sporozoite positive mosquitoes                                                      | 4                           | 25                            |
| Sporozoite rate                                                                                     | 0.0002                      | 0.0053                        |
| <b>Annual EIR (Adjusted)**</b>                                                                      | <b>4.22</b>                 | <b>11.65</b>                  |
| <b>% EIR Contribution (Adjusted)**</b>                                                              | <b>26.61%</b>               | <b>73.39%</b>                 |
| <b>Annual EIR (not adjusted)</b>                                                                    | <b>1.27</b>                 | <b>7.92</b>                   |
| <b>% EIR Contribution (not adjusted)</b>                                                            | <b>13.79%</b>               | <b>86.21%</b>                 |

- Annual EIR (Corrected biting rate x Sporozoite rate x 365)
- Overall EIR (EIR for *An. arabiensis*+ EIR for *An. funestus*) = 18.45
- \*86.3% of the mosquitoes from the *An. funestus* group tested were *An. funestus* s.s, 8.4% were *An. leesonii* and 5.2% were *An. rivulorum*. Of all *An. funestus* s.l mosquitoes that tested positive for malaria parasites, 96% were *An. funestus* s.s, the remaining 4% being *An. rivulorum*.
- \*\*Where the estimates are adjusted, these adjustments were done using coefficients computed as the ratio of mosquito catches by CDC-Light Traps to catches Human Landing Catch methods. These coefficients were 0.3 for *An. arabiensis* and 0.68 for *An. funestus* as determined by Okumu et al 2008 [35]

<https://doi.org/10.1371/journal.pone.0177807.t001>

### Spatial distribution of sporozoite infected *An. funestus* and *An. Arabiensis*

Sporozoite infected *An. funestus* were widely distributed across all the study villages, it was also observed that *An. arabiensis* were mostly confined to an area in the middle of the study area (Fig 4). The total number of sporozoite infected mosquitoes during the year was, however, too small to enable detailed analysis of spatial relations.

**Table 2. Monthly sporozoite rates and Entomological Inoculation Rates (EIR) (number of infectious bites per person per month) for *Anopheles funestus* and *Anopheles arabiensis* from January to December 2016.**

| Month     | <i>Anopheles funestus</i>   |                                    |                           |                  | <i>Anopheles arabiensis</i> |                                    |                           |                  |
|-----------|-----------------------------|------------------------------------|---------------------------|------------------|-----------------------------|------------------------------------|---------------------------|------------------|
|           | Number of Mosquitoes Tested | Monthly biting rates (adjusted **) | Sporozoite Infection Rate | Mean Monthly EIR | Number of Mosquitoes Tested | Monthly biting rates (adjusted **) | Sporozoite Infection Rate | Mean Monthly EIR |
| January   | 147                         | 44.10                              | 0.0219                    | 0.97             | 963                         | 288.90                             | 0.0068                    | 1.96             |
| February  | 658                         | 197.40                             | 0.0107                    | 2.12             | 1640                        | 492.00                             | 0.0000                    | 0.00             |
| March     | 249                         | 74.70                              | 0.0129                    | 0.96             | 2111                        | 633.30                             | 0.0000                    | 0.00             |
| April     | 563                         | 168.90                             | 0.0413                    | 6.98             | 1502                        | 450.60                             | 0.0000                    | 0.00             |
| May       | 1148                        | 344.40                             | 0.0113                    | 3.89             | 6968                        | 2090.40                            | 0.0005                    | 0.94             |
| June      | 879                         | 263.70                             | 0.0153                    | 4.04             | 2576                        | 772.80                             | 0.0000                    | 0.00             |
| July      | 489                         | 146.70                             | 0.0132                    | 1.94             | 1283                        | 384.90                             | 0.0000                    | 0.00             |
| August    | 371                         | 111.30                             | 0.0174                    | 1.94             | 1478                        | 443.40                             | 0.0023                    | 1.00             |
| September | 109                         | 32.70                              | 0.0000                    | 0.00             | 859                         | 257.70                             | 0.0000                    | 0.00             |
| October   | 49                          | 14.70                              | 0.0000                    | 0.00             | 244                         | 73.20                              | 0.0000                    | 0.00             |
| November  | 26                          | 7.80                               | 0.0000                    | 0.00             | 51                          | 15.30                              | 0.0000                    | 0.00             |
| December  | 71                          | 21.30                              | 0.0910                    | 1.94             | 460                         | 138.00                             | 0.0000                    | 0.00             |

\*\* Values adjusted based on Okumu et al 2008; see Table 1

<https://doi.org/10.1371/journal.pone.0177807.t002>

**Table 3. Host blood antigens detected in blood-meals obtained from *Anopheles* mosquitoes.**

| Blood meal source | <i>Anopheles arabiensis</i> |      | <i>Anopheles funestus</i> s. |     | <i>Anopheles leesonii</i> |     |
|-------------------|-----------------------------|------|------------------------------|-----|---------------------------|-----|
|                   | N                           | %    | N                            | %   | N                         | %   |
| Human             | 47                          | 73.4 | 17                           | 100 | 1                         | 100 |
| Bovine            | 14                          | 22   | 0                            | 0   | 0                         | 0   |
| Dog               | 2                           | 3.1  | 0                            | 0   | 0                         | 0   |
| Chicken           | 1                           | 1.5  | 0                            | 0   | 0                         | 0   |

<https://doi.org/10.1371/journal.pone.0177807.t003>

### Insecticide susceptibility test results

The insecticide susceptibility test results are summarized in Table 3. There was 100% mortality in the susceptible reference *An. gambiae* s.s colony when exposed to all the candidate insecticides tested. The wild-caught *An. funestus* were also fully susceptible to pirimiphos methyl (100% mortality), malathion (100%), and dieldrin (100%), but they were resistant to permethrin (10.5% mortality), deltamethrin (18.7%), lambda cyhalothrin (18.7%) and DDT (26.2%). In these tests, the *An. funestus* also showed reduced susceptibility to bendiocarb (95% mortality) and propoxur (90.1% mortality). The overall mortality of the *An. funestus* mosquitoes exposed to control papers was 5.4%.

### Parity rates of *An. funestus* relative to *An. arabiensis* mosquitoes

Of the 302 *An. funestus* dissected, 65.8% were parous, 28.8% were nulliparous, and 5.2% were pre-gravid. Of the 162 *An. arabiensis* dissected, 49.3% were parous, 37% were nulliparous and 13.5% were pre-gravid.

### Discussion

Malaria prevalence is declining across most of African countries [1], due to improved vector control [1] and case management, but also urbanization, improved health care and better living standards [1]. Long-lasting insecticide treated nets (LLINs) and indoor residual spraying (IRS) contributed 78% of all gains accrued since 2000 [37]. In rural south-eastern Tanzania, where malaria prevalence has reduced by >60% since 2000, low-level transmission still persists despite persistently high LLIN coverage [38]. Our study re-assessed the residual malaria transmission dynamics in rural south-eastern Tanzania, in an area where the last mass distribution of bednets was conducted between 2010 and 2011, four years before our study [19]. This study therefore provides an essential update, of the transmission situation and demonstrates the now dominant role of *An. funestus*. Like in most residual transmission settings in East Africa, our study confirms that populations of formerly notorious *An. gambiae* s.s, have significantly diminished, or completely vanished [10, 39]. *An. arabiensis* now dominates in numbers, but the far more competent vector *An. funestus* carries most of the residual malaria parasites, despite being highly outnumbered by *An. arabiensis*. This study clearly provides a clear lead to the hypothesis that interventions targeting *An. funestus* could dramatically reduce malaria transmission in areas such as the ones where this study was conducted.

This study has also determined that *An. funestus* vector is resistant to pyrethroids used on LLINs (Table 4), and survives unexpectedly longer than *An. arabiensis*, thus requiring new control approaches. Given the extensive resistance in the species population against a wide range of insecticides currently approved for public health use, it appears that we now have only a limited set of options, including organophosphates such as pirimiphos methyl. Thus, one of the main control methods that could be used against this species is focal IRS with long-

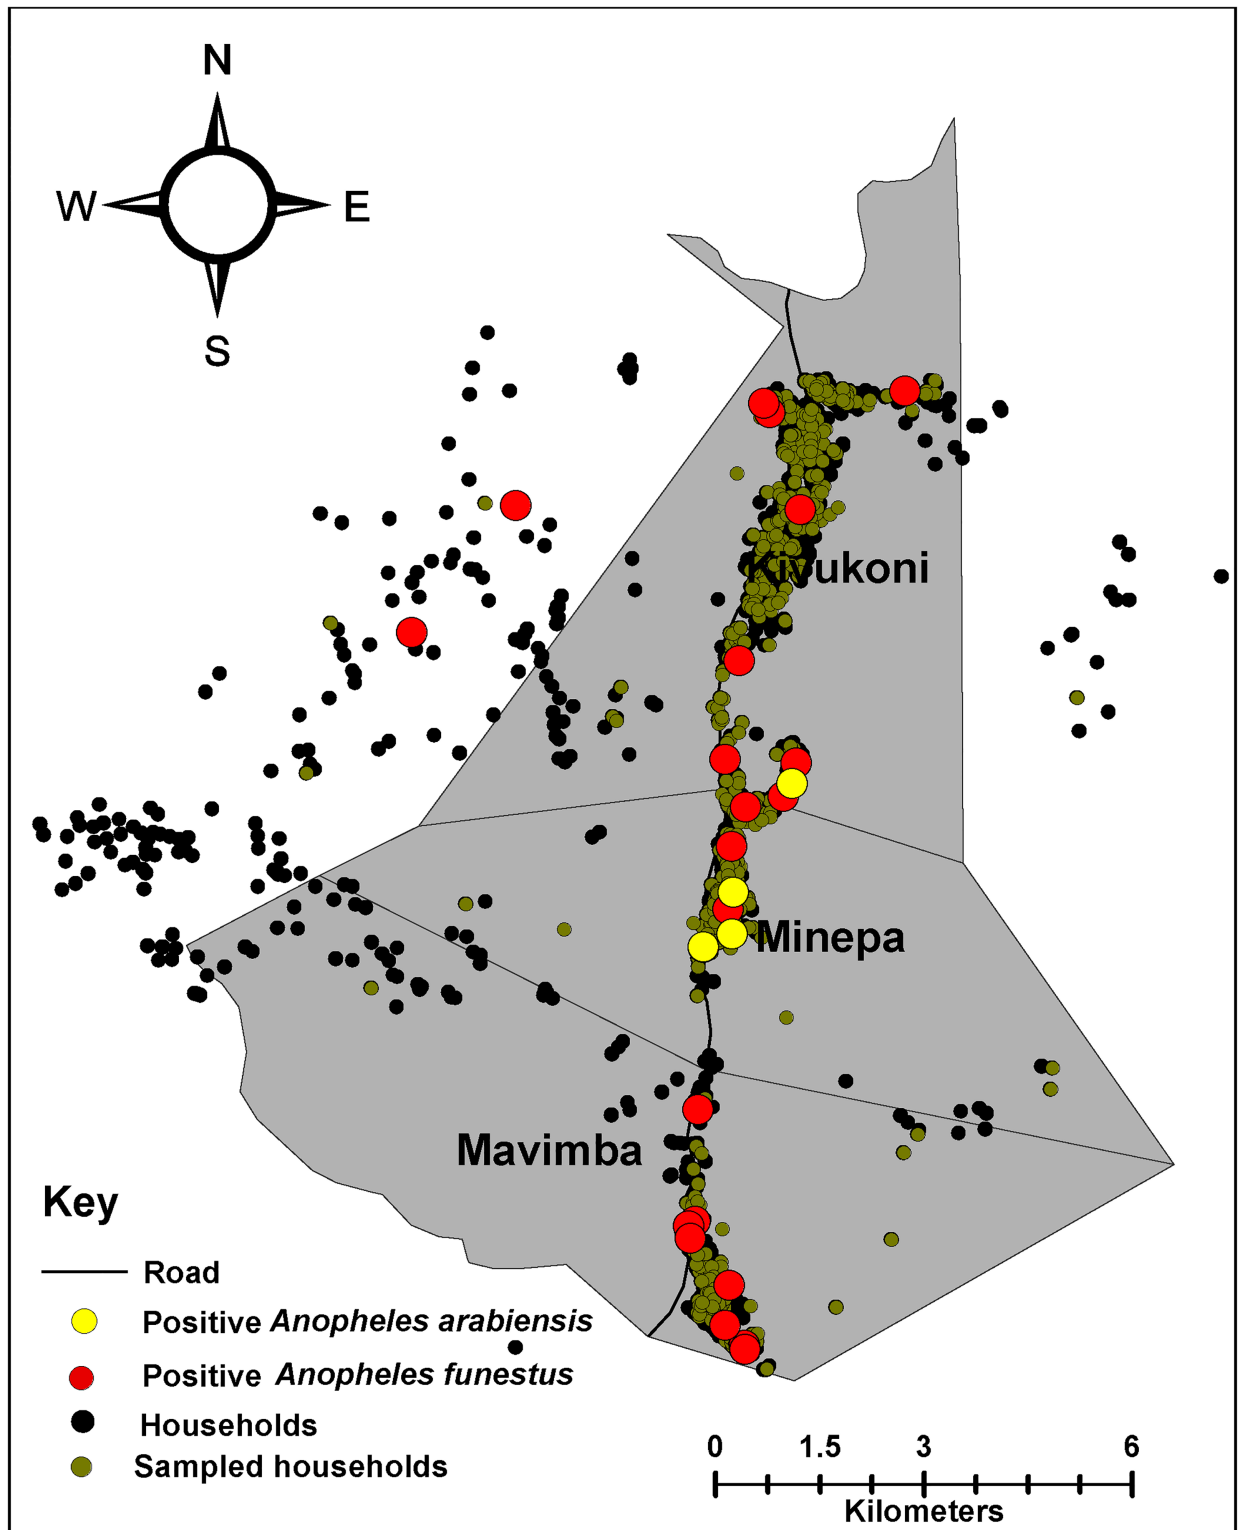

Fig 4. Distribution of *Plasmodium* infected *An. funestus* and *An. arabiensis*.

<https://doi.org/10.1371/journal.pone.0177807.g004>

**Table 4. Summary of data on susceptibility of wild-caught adult female *Anopheles funestus* mosquitoes collected in the study sites.**

| Insecticide tested       | Total. No. Exposed | Number of mosquitoes knocked- down (KD) |        |        |        |        |        |        |             | Mortality      |        |         |    |
|--------------------------|--------------------|-----------------------------------------|--------|--------|--------|--------|--------|--------|-------------|----------------|--------|---------|----|
|                          |                    | 10 min                                  | 15 min | 20 min | 30 min | 40 min | 50 min | 60 min | % KD 60 min | Total No. Dead | % Dead | Status* |    |
| Control                  | 129                | 0                                       | 0      | 0      | 0      | 0      | 0      | 0      | 0           | 0              | 7      | 5.4     | -  |
| 0.75% Permethrin         | 95                 | 0                                       | 0      | 0      | 0      | 1      | 1      | 1      | 1           | 1.1            | 10     | 10.5    | RR |
| 0.05% Deltamethrin       | 80                 | 2                                       | 2      | 1      | 2      | 3      | 3      | 6      | 6           | 7.5            | 15     | 18.7    | RR |
| 0.05% Lambda cyhalothrin | 80                 | 0                                       | 0      | 1      | 1      | 1      | 2      | 4      | 4           | 5.0            | 15     | 18.7    | RR |
| 0.1% Bendiocarb          | 80                 | 0                                       | 2      | 2      | 6      | 27     | 31     | 35     | 35          | 43.7           | 76     | 95.0    | RI |
| 0.1% Propoxur            | 81                 | 21                                      | 36     | 46     | 67     | 58     | 75     | 77     | 77          | 95.0           | 73     | 90.1    | RI |
| 0.25% Pirimiphos-methyl  | 84                 | 6                                       | 3      | 8      | 46     | 63     | 80     | 80     | 80          | 95.2           | 84     | 100.0   | SS |
| 5% Malathion             | 80                 | 7                                       | 13     | 32     | 55     | 74     | 78     | 79     | 79          | 98.7           | 80     | 100.0   | SS |
| 4% DDT                   | 80                 | 0                                       | 0      | 4      | 7      | 9      | 8      | 13     | 13          | 16.2           | 21     | 26.2    | RR |
| 0.4% Dieldrin            | 80                 | 0                                       | 0      | 0      | 0      | 2      | 6      | 14     | 14          | 17.5           | 80     | 100.0   | SS |

\*Susceptibility status:

- SS: Indicates susceptibility
- RR: Confirmation of resistance in the tested mosquito population.
- RI: Suggest the existence of resistance and further investigation is needed.

<https://doi.org/10.1371/journal.pone.0177807.t004>

lasting formulations of organophosphates (e.g. Actellic<sup>®</sup> CS-300), against which *An. funestus* are still highly susceptible. Other potential interventions may include house improvement and house screening, as well as use of eave baffles treated with organophosphates, which would take far less insecticide, but deliver equal impact on the mosquito populations as IRS (Killeen *et al* unpublished manuscript). Going forward, it may be desirable to conduct new evidence-based studies in well-characterized areas such as these study sites, to demonstrate possible vector elimination strategies leading to malaria transmission control. Approaches may include combinations of organophosphate-based IRS alongside other interventions like LLINs, improved housing and larval source management, especially where rice growing is commonly practiced.

To achieve malaria elimination, we must identify and target all pockets of transmission, including geographically distinct areas of high transmission and demographically high-risk sub-populations [40, 41]. In this study setting in rural south-eastern Tanzania, low-level transmission persists, despite over 80% LLIN coverage [38]. The persistent residual transmission is most definitely mediated predominantly by *An. funestus* s.s, suggesting possibly that targeted, high impact, species-specific interventions may improve control and accelerate efforts towards eventual malaria elimination. Our recent findings suggested that the overall distribution of malaria mosquitoes, including *An. funestus* is strongly influenced by and can be predicted based on numbers and spatial variability of household occupancy [8]. The densities of *Anopheles* mosquitoes were highest in rainy season even though transmission was evidently sustained at low densities even in dry season, mostly by *An. funestus*. Since aquatic breeding habitats for *An. funestus* are not easily identified, it may be necessary to identify other environmental characteristics that affect natural abundance of *An. funestus* within villages and between households. This approach can be feasible by involving the local community and volunteers. The evidence from Mwangungulu *et al* show that scientists can rely on community knowledge and experiences to identify areas where mosquitoes are most abundant [42].

The data presented here would be essential in developing control measures that target primarily the most important residual vector species, in this case *An. funestus*. In these specific study settings in Tanzania, the nucleated settlements, and spatial correlations between human biomass and vector densities [8], indicates this proposed study area renders itself well to spatially-targeted interventions. The study has rigorously demonstrated that *An. funestus* is now the primary vector of malaria in this area in rural-south eastern Tanzania, despite concurrently high densities of other species such as *An. arabiensis*. The area historically had very high malaria transmission, averaged 400 infectious bites/person/year (ib/p/y) until early 2000s [43], with prevalence as high as 70% in 1990s [44], but this study indicates that transmission has now dropped around 20 ib/p/y. Moreover, this study has also demonstrated that *An. funestus* s.s co-exists with *An. rivulorum* and *An. lesoni*, but malaria transmission was mainly mediated by *An. funestus* s.s. It is not possible to determine conclusively if the greater contribution of the *An. funestus* s.s. to malaria transmission is mostly due to its relatively higher abundance than that of the other sibling species, but it is clear that this species mediates most of the residual transmission.

Of all the *An. funestus* mosquitoes that tested positive for malaria parasites, *An. funestus* s. s. comprised 96% of those *An. funestus* s.l. which were positive for *Plasmodium* sporozoites., though their overall relative abundance was 76.6%, while *An. rivulorum* was responsible for 4% of the infections though their relative abundance was only 2.9% of all the *An. funestus* mosquitoes. *Anopheles lesoni*, constituted 7.1% of all mosquitoes in this group, but carried no infections at all. Given that the ELISA lysates were all boiled to eliminate any false positives [28], occasionally associated with non-*Plasmodium* protozoans transmitted by zoophilic mosquitoes [45], we can assume, based on the 4% sporozoites rates, that *An. rivulorum* is indeed an important vector in this setting, and that its role is limited mostly by its low densities, relative to the other species. Other studies in East Africa have previously demonstrated the importance of the species in residual transmission settings [46], its role increasing after the decline of *An. gambiae* s.s populations [47, 48] (Table 5). Our study did not however,

**Table 5. Examples of other localities where *Anopheles funestus* mosquitoes have been demonstrated to mediate most of the residual malaria transmission, and where control programs targeting *An. funestus* with effective interventions, could drastically reduce local transmission.**

| SN | Country      | Intervention   | Dominant Vectors        | Other Vectors                                      | Resistance Status                                                               | Sporozoite Rates                                                                        | Implications for malaria transmission control                                                                                           | Reference |
|----|--------------|----------------|-------------------------|----------------------------------------------------|---------------------------------------------------------------------------------|-----------------------------------------------------------------------------------------|-----------------------------------------------------------------------------------------------------------------------------------------|-----------|
| 1  | Kenya        | ITNs and LLINs | <i>An. funestus</i>     | <i>An. arabiensis</i> ,<br><i>An. gambiae</i> s.s. | Pyrethroid resistance confirmed                                                 | <i>An. funestus</i> 4.5%,<br><i>An. arabiensis</i> 0.9%,<br><i>An. gambiae</i> s.s 8.6% | Reduced effectiveness of the current interventions                                                                                      | [52]      |
| 2  | Burkina Faso |                | <i>An. gambiae</i> s.l. | <i>An. funestus</i> s.l,<br><i>An. nili</i>        | No pyrethroid detected. <i>An. funestus</i> in was highly resistant to dieldrin | <i>An. funestus</i> (2.6% -9.7%)                                                        | <i>An. funestus</i> had higher biting rates and high sporozoite rate compared to <i>An.gambiae</i> complex                              | [53]      |
| 3  | Tanzania     | LLINs          | <i>An. gambiae</i> s.l. | <i>An. funestus</i> s.l                            | Pyrethroid resistance confirmed                                                 | <i>An. funestus</i> (0.16% -1.47%)                                                      | Resurgence of malaria transmission in Kilombero valley, Tanzania                                                                        | [10]      |
| 4  | Senegal      | LLINs          | <i>An. funestus</i>     | -                                                  | -                                                                               | <i>An. funestus</i> 1.28%                                                               | <i>An. funestus</i> changed their host seeking behaviour following the introduction of LLINs, thus compromising effectiveness of LLINs. | [54]      |
| 5  | Cameroon     |                | <i>An. funestus</i> s.s | <i>An. gambiae</i> s.s                             | -                                                                               | <i>An. funestus</i> 6.8%,<br><i>An.gambiae</i> s.s 0.6%- 4.1%                           | <i>An. funestus</i> accounts for 88% of the transmission in this setting.                                                               | [55]      |

<https://doi.org/10.1371/journal.pone.0177807.t005>

identify any *Plasmodium* infections in any of the other *Anopheles* mosquitoes collected, i.e. *An. coustani*, *An. squamosus*, *An. ziemanni* and *An. wellcomei*, at any time during the study, thus these species are likely to be of negligible importance in malaria transmission in this setting. Furthermore, this can be attributed to their low relative abundance in this area. Some previous studies have reported sporozoite infections in *An. coustani* [49], *An. squamosus* [50] and *An. ziemanni* [51], but no such evidence was observed in this current study. Table 5 shows some of the other localities where *An. funestus* mosquitoes significantly contribute to the residual malaria transmission.

The extremely high proportion of *Plasmodium* infections currently mediated by *An. funestus* mosquitoes in this area is compounded by, and is likely also a result of the very high insecticide resistance in this species. This study found that *An. funestus* mosquitoes were not only carrying most of the residual malaria parasites, but they were also very highly resistant to common pyrethroids used for vector control, i.e. deltamethrin, permethrin, lambda-cyhalothrin, as well as to the organochlorine, DDT. Moreover, there was also reduced susceptibility to insecticides like bendiocarb and propoxur, which would normally be candidates for replacing the pyrethroids. An earlier study by Lwetoijera *et al.* in the neighbouring Kilombero district, also found increasing importance of *An. funestus* in malaria transmission associated with high resistance [10]. Even though the insecticide susceptibility status for *An. arabiensis* was not evaluated in this study, a separate study from these villages by Matowo *et al.* (unpublished findings) found *An. arabiensis* to be also highly resistant to pyrethroid chemicals.

While the high human blood index observed in the *An. funestus* clearly suggests that the species could still be best targeted by household-based interventions that protect humans. Observations of increasing outdoor biting by the different *An. funestus* sibling species has been reported in this study area [56, 57], which warrants consideration of complementary interventions that also target outdoor-biting vectors. Also, given the high resistance to the common insecticides for vector control, it appears that use of organophosphates, against which the vector is still susceptible, notably pirimiphos methyl, could provide a temporary solution against residual malaria transmission in this area. Long-lasting formulations of pirimiphos methyl already exist [58], which could be used for IRS in this area to complement LLINs, as it has already been implemented in Zanzibar, northern region and lake zones in Tanzania [59].

Other possible high value interventions could be insecticidal eave baffles (Killeen *et al.* Unpublished), especially in areas where even outdoor-biting populations forage indoors for their adult life [60]. This study did not assess the role of *An. funestus* on outdoor malaria transmission, but, a separate study conducted in the same villages by Ngowo *et al.* (unpublished findings) yield evidence that some *An. funestus* collected outdoors were found to be sporozoite positive. Furthermore, tools should be included such as chemicals with new AIs available for IRS that are being evaluated for consideration by the WHO, including non-pyrethroid active ingredients like neonicotinoids as well as bednets that combine synergists with pyrethroids, or those that combine different insecticide classes to tackle insecticide resistance and lower vector survival.

One limitation of this study is that collections for insecticide susceptibility were conducted on wild caught females of variable age, since we could not find adequate larvae for the assays. WHO recommends where possible to use mosquitoes of the same age cohort (F1 progeny). Using wild mosquitoes that are older than the standard 3–5 days may lead to underestimation of resistance depending on the species distribution and the insecticide being tested. Blood meal analyses were carried out on visually blooded mosquitoes and so may have missed those with small amounts of blood in their abdomens, such as those that had interrupted feeding or had partially digested the blood. Another potential limitation is that parity assessments, such as the ones conducted here are greatly impacted by season, this study conducted parity

assessment for mosquitoes collected for two months, we suggest that future further studies should be done to assess parity status across seasons. Lastly, there was also a significant non-amplification of mosquito samples during the PCR analysis to determine the sibling species. About 13.4% of all sample analyzed in the laboratory did not amplify. An analysis of the sample handling processes, the analysis process, and the control samples, suggests that the laboratory processes were unlikely to be the reason for the non-amplification. Instead, this situation might have arisen due to sub-optimal storage conditions of some samples, or minor discrepancies in the morphological identification. These specific processes therefore deserve greater attention in future analyses.

## Conclusion

This study provides an update on the residual malaria transmission situation in rural south-eastern Tanzania, where LLINs were already widely distributed. Though *An. arabiensis* is still the most abundant vector species here, ongoing residual transmission is predominantly mediated by *An. funestus*, possibly due to high resistance and high survival probabilities. Interventions that effectively target *An. funestus* could therefore significantly improve control of residual malaria transmission in the area.

## Supporting information

**S1 File. Supplementary data.** A file containing supplementary data depicting graphs used in this manuscript.  
(CSV)

## Acknowledgments

We thank the local communities of Ulanga district for allowing us to work in their houses. We thank Mr. Zeno Lipambila, Mr. Maxeclin Ngakuka and Mr. Hamis Bwanary for their assistance during mosquito collection in the village. We also thank the project team Alex Limwagu, Jose Mgando, Doreen Siria, Felician Meza, Said Abbasi, Dickson Lwetoijera, Deogratius Roman, Elihaika Minja, Mercy Opiyo, Jonhson Kyeba, Robert Sumaye, Mwajabu Hamis, and Sebard Mteteleka. We thank Japhet Kihonda for assistance during mosquito dissection, Neema Nombo and Paulina Kasanga for their help in the susceptibility tests.

## Author Contributions

**Conceptualization:** EWK FOO.

**Data curation:** HSN.

**Formal analysis:** EWK HSN FOO.

**Funding acquisition:** EWK FOO NSM.

**Investigation:** GM EWK AM MF.

**Methodology:** EWK FOO MF.

**Project administration:** EWK.

**Resources:** FOO.

**Supervision:** FOO.

**Writing – original draft:** EWK FOO MF HSN NSM.

Writing – review & editing: EWK FOO MF HSN NSM.

## References

1. World Health Organization (2016) World Malaria Report.
2. Sicuri E, Vieta A, Lindner L, Constenla D, Sauboin C (2013) The economic costs of malaria in children in three sub-Saharan countries: Ghana, Tanzania and Kenya. *Malaria Journal* 12(1):307
3. National Malaria Control Program (Tanzania) (2013) An Epidemiological Profile Of Malaria And Its Control In Mainland Tanzania: Report Funded By Roll Back Malaria And Department For International Development
4. Killeen G, Tami A, Kihonda J, Okumu F, Kotas M, Grundmann H, et al (2007) Cost-sharing strategies combining targeted public subsidies with private-sector delivery achieve high bednet coverage and reduced malaria transmission in Kilombero Valley, southern Tanzania. *BMC Infectious Diseases* 7(1):1
5. United Republic of Tanzania (2016) Tanzania Demographic and Health Survey and Malaria Indicator Survey 2015–2016
6. Mandike R. Tanzanian National Malaria Control Program (NMCP) (2014) Strategy 2014–2020. Presentation
7. Lwetoijera DW, Kiware SS, Mageni ZD, Dongus S, Harris C, Devine GJ, et al (2013) A need for better housing to further reduce indoor malaria transmission in areas with high bed net coverage. *Parasites and Vectors* 6(1):1
8. Kaindoa EW, Mkandawile G, Ligamba G, Kelly-Hope LA, Okumu FO (2016) Correlations between household occupancy and malaria vector biting risk in rural Tanzanian villages: implications for high-resolution spatial targeting of control interventions. *Malaria Journal*. 15(1):1
9. Kirby MJ, Green C, Milligan PM, Sismanidis C, Jasseh M, Conway DJ, et al (2008) Risk factors for house-entry by malaria vectors in a rural town and satellite villages in The Gambia. *Malaria Journal*. 7(1):1
10. Lwetoijera DW, Harris C, Kiware SS, Dongus S, Devine GJ, McCall PJ, et al (2014) Increasing role of *Anopheles funestus* and *Anopheles arabiensis* in malaria transmission in the Kilombero Valley, Tanzania. *Malaria Journal*. 13(1):1
11. Kawada H, Dida GO, Ohashi K, Komagata O, Kasai S, Tomita T, et al (2011) Multimodal pyrethroid resistance in malaria vectors, *Anopheles gambiae* ss, *Anopheles arabiensis*, and *Anopheles funestus* ss in western Kenya. *PLOS One*; 6(8):e22574 <https://doi.org/10.1371/journal.pone.0022574> PMID: 21853038
12. Morgan JC, Irving H, Okedi LM, Steven A, Wondji CS (2010) Pyrethroid resistance in an *Anopheles funestus* population from Uganda. *PLOS One*; 5(7):e11872 <https://doi.org/10.1371/journal.pone.0011872> PMID: 20686697
13. Mulamba C, Riveron JM, Ibrahim SS, Irving H, Barnes KG, Mukwaya LG, et al (2014) Widespread pyrethroid and DDT resistance in the major malaria vector *Anopheles funestus* in East Africa is driven by metabolic resistance mechanisms. *PLOS One*; 9(10):e110058. <https://doi.org/10.1371/journal.pone.0110058> PMID: 25333491
14. Huho B, Briët O, Seyoum A, Sikaala C, Bayoh N, Gimnig J, et al (2013) Consistently high estimates for the proportion of human exposure to malaria vector populations occurring indoors in rural Africa. *International Journal of Epidemiology*; 42(1):235–47 <https://doi.org/10.1093/ije/dys214> PMID: 23396849
15. Coetzee M, Fontenille D (2004) Advances in the study of *Anopheles funestus*, a major vector of malaria in Africa. *Insect Biochemistry and Molecular Biology*; 34(7):599–605 <https://doi.org/10.1016/j.ibmb.2004.03.012> PMID: 15242700
16. Cohuet A, Simard F, Toto J-C, Kengne P, Coetzee M, Fontenille D (2003) Species identification within the *Anopheles funestus* group of malaria vectors in Cameroon and evidence for a new species. *The American Journal of Tropical Medicine and Hygiene*; 69(2):200–5 PMID: 13677376
17. Koekemoer L, Kamau L, Hunt R, Coetzee M (2002) A cocktail polymerase chain reaction assay to identify members of the *Anopheles funestus* (Diptera: Culicidae) group. *The American Journal of Tropical Medicine and Hygiene*; 66(6):804–11 PMID: 12224596
18. Scott JA, Brogdon WG, Collins FH (1993) Identification of single specimens of the *Anopheles gambiae* complex by the polymerase chain reaction. *The American Journal of Tropical Medicine and Hygiene*; 49(4):520–9 PMID: 8214283
19. Renggli S, Mandike R, Kramer K, Patrick F, Brown NJ, McElroy PD, et al (2013) Design, implementation and evaluation of a national campaign to deliver 18 million free long-lasting insecticidal nets to uncovered sleeping spaces in Tanzania. *Malaria Journal*; 12(1):1



20. Geubbels E, Amri S, Levira F, Schellenberg J, Masanja H, Nathan R (2015) Health & demographic surveillance system profile: the Ifakara rural and urban health and demographic surveillance system (Ifakara HDSS). *International journal of Epidemiology*; 44(3):848–61 <https://doi.org/10.1093/ije/dyv068> PMID: 25979725
21. Mboera L, Kihonda J, Braks M, Knols B. Short report (1998) Influence of centers for disease control light trap position, relative to a human-baited bed net, on catches of *Anopheles gambiae* and *Culex quinquefasciatus* in Tanzania. *The American Journal of Tropical Medicine and Hygiene*; 59(4):595–6 PMID: 9790436
22. Lines J, Curtis C, Wilkes T, Njunwa K (1991) Monitoring human-biting mosquitoes (Diptera: Culicidae) in Tanzania with light-traps hung beside mosquito nets. *Bulletin of Entomological Research*; 81(01):77–84
23. Maia MF, Robinson A, John A, Mgando J, Simfukwe E, Moore SJ (2011) Comparison of the CDC Backpack aspirator and the Prokopack aspirator for sampling indoor-and outdoor-resting mosquitoes in southern Tanzania. *Parasite and Vectors*; 4:124
24. Gillies M, Coetzee M (1987) A supplement to the Anophelinae of Africa South of the Sahara (Afrotropical Region)
25. Koekemoer LL, Kamau L, Hunt RH, Coetzee M (2002) A cocktail polymerase chain reaction assay to identify members of the *Anopheles funestus* (Diptera: Culicidae) group. *Am J Trop Med Hyg*; 66(6):804–11 PMID: 12224596
26. Cohuet A, Simard F, Toto JC, Kengne P, Coetzee M, Fontenille D (2003) Species identification within the *Anopheles funestus* group of malaria vectors in Cameroon and evidence for a new species. *Am J Trop Med Hyg*; 69(2):200–5 PMID: 13677376
27. Beier JC, Perkins PV, Koros JK, Onyango FK, Gargan TP, Wirtz RA, et al (1990) Malaria sporozoite detection by dissection and ELISA to assess infectivity of afrotropical *Anopheles* (Diptera: Culicidae). *Journal of Medical Entomology*; 27(3):377–84 PMID: 2185363
28. Durnez L, Van Bortel W, Denis L, Roelants P, Veracx AI, Trung HD, et al (2011) False positive circumsporozoite protein ELISA: a challenge for the estimation of the entomological inoculation rate of malaria and for vector incrimination. *Malar J* 1; 10:195 <https://doi.org/10.1186/1475-2875-10-195> PMID: 21767376
29. Beier JC, Perkins PV, Wirtz RA, Koros J, Diggs D, Gargan TP, et al (1988) Bloodmeal identification by direct enzyme-linked immunosorbent assay (ELISA), tested on *Anopheles* (Diptera: Culicidae) in Kenya. *Journal of Medical Entomology*; 25(1):9–16 PMID: 3357176
30. World Health Organization (2013). Test procedures for insecticide resistance monitoring in malaria vector mosquitoes. Geneva, World Health Organization
31. Detinova TS (1962) Age grouping methods in Diptera of medical importance with special reference to some vectors of malaria. *Age Grouping Methods in Diptera of Medical Importance with special reference to some Vectors of Malaria*.
32. World Health Organization (1975) *Manual on practical entomology part II method and techniques*, pp. 1–186. Geneva, Switzerland.
33. Pinheiro J, Bates D, DebRoy S, Sarkar D. R (2013) Development Core Team. nlme: Linear and nonlinear mixed effects models. R package version: 3.1–109. Computer software.
34. Skaug H, Fournier D, Nielsen A, Magnusson A, Bolker B (2013) Generalized linear mixed models using AD model builder. R package version 07.
35. Oketch F, Kotas M, Kihonda J, Killeen G, Moore S (2008) Comparative evaluation of methods used for sampling malaria vectors in the Kilombero Valley, South Eastern Tanzania. *The Open Tropical Medicine Journal*; 1:51–5
36. Bonner K, Mwita A, McElroy PD, Omari S, Mzava A, Lengeler C, et al (2011) Design, implementation and evaluation of a national campaign to distribute nine million free LLINs to children under five years of age in Tanzania. *Malaria Journal*; 10(1):1
37. Bhatt S, Weiss D, Cameron E, Bisanzio D, Mappin B, Dalrymple U, et al (2015) The effect of malaria control on *Plasmodium falciparum* in Africa between 2000 and 2015. *Nature*; 526(7572):207–11 <https://doi.org/10.1038/nature15535> PMID: 26375008
38. Tanzania National Malaria Control Program, Ifakara Health Institute, World Health Organization, KEMRI-Wellcome Trust (2013) *An epidemiological profile of malaria and its control in mainland Tanzania*.
39. Bayoh MN, Mathias DK, Odiero MR, Mutuku FM, Kamau L, Gimnig JE, et al (2010) *Anopheles gambiae*: historical population decline associated with regional distribution of insecticide-treated bed nets in western Nyanza Province, Kenya. *Malaria Journal*; 9(1):62

40. Sturrock HJ, Hsiang MS, Cohen JM, Smith DL, Greenhouse B, Bousema T, et al (2013) Targeting asymptomatic malaria infections: active surveillance in control and elimination.
41. Bousema T, Griffin JT, Sauerwein RW, Smith DL, Churcher TS, Takken W, et al (2012) Hitting hotspots: spatial targeting of malaria for control and elimination. *PLOS Medicine*; 9(1):e1001165. <https://doi.org/10.1371/journal.pmed.1001165> PMID: 22303287
42. Mwangungulu SP, Sumaye RD, Limwagu AJ, Siria DJ, Kaindoa EW, Okumu FO (2016). Crowdsourcing vector surveillance: using community knowledge and experiences to predict densities and distribution of outdoor-biting mosquitoes in rural Tanzania. *PLOS One.*; 11(6):e0156388 <https://doi.org/10.1371/journal.pone.0156388> PMID: 27253869
43. Russell TL, Lwetoijera DW, Maliti D, Chipwaza B, Kihonda J, Charlwood JD, et al (2010) Impact of promoting longer-lasting insecticide treatment of bed nets upon malaria transmission in a rural Tanzanian setting with pre-existing high coverage of untreated nets. *Malar J*; 9(1):187
44. Smith T, Charlwood JD, Kihonda J, Mwangusye S, Billingsley P, Meuwissen J, et al (1993) Absence of seasonal variation in malaria parasitemia in an area of intense seasonal transmission. *Acta Tropica*; 54:55–72 PMID: 8103627
45. Bashar K, Tuno N, Ahmed Tu, Howlader AJ (2013) False positivity of circumsporozoite protein (CSP)–ELISA in zoophilic anophelines in Bangladesh. *Acta tropica*; 125(2):220–5 <https://doi.org/10.1016/j.actatropica.2012.10.004> PMID: 23085098
46. Kawada H, Dida GO, Sonye G, Njenga SM, Mwandawiro C, Minakawa N (2012). Reconsideration of *Anopheles rivulorum* as a vector of *Plasmodium falciparum* in Western Kenya: some evidence from biting time, blood preference, sporozoite positive rate, and pyrethroid resistance. *Parasites and Vectors*; 5(1):230
47. Gillies M, Smith A (1960) The effect of a residual house spraying campaign in East Africa on species balance in the *Anopheles funestus* group: the replacement of *Anopheles funestus* by *Anopheles rivulorum*. *Bulletin of Entomological Research*; 51:243–53
48. Wilkes T, Matola Y, Charlwood J (1996) *Anopheles rivulorum*, a vector of human malaria in Africa. *Medical and Veterinary Entomology*; 10:108–10 PMID: 8834753
49. Mwangangi JM, Muturi EJ, Muriu SM, Nzovu J, Midega JT, Mbogo C (2013) The role of *Anopheles arabiensis* and *Anopheles coustani* in indoor and outdoor malaria transmission in Taveta District, Kenya. *Parasites and Vectors*; 6(1):1
50. Stevenson JC, Simubali L, Mbambara S, Musonda M, Mweetwa S, Mudenda T, et al (2016) Detection of *Plasmodium falciparum* Infection in *Anopheles squamosus* (Diptera: Culicidae) in an Area Targeted for Malaria Elimination, Southern Zambia. *Journal of medical entomology*:tjw091
51. Maia MF, Abonuusum A, Lorenz LM, Clausen P-H, Bauer B, Garms R, et al (2012) The effect of deltamethrin-treated net fencing around cattle enclosures on outdoor-biting mosquitoes in Kumasi, Ghana. *PLOS One*; 7(9):e45794 <https://doi.org/10.1371/journal.pone.0045794> PMID: 23029245
52. McCann RS, Ochomo E, Bayoh MN, Vulule JM, Hamel MJ, Gimnig JE, et al (2014) Reemergence of *Anopheles funestus* as a vector of *Plasmodium falciparum* in western Kenya after long-term implementation of insecticide-treated bed nets. *The American Journal of Tropical Medicine and Hygiene*; 90(4):597–604 <https://doi.org/10.4269/ajtmh.13-0614> PMID: 24470562
53. Dabire K, Baldet T, Diabate A, Dia I, Costantini C, Cohuet A, et al (2007) *Anopheles funestus* (Diptera: Culicidae) in a humid savannah area of western Burkina Faso: bionomics, insecticide resistance status, and role in malaria transmission. *Journal of Medical Entomology*; 44(6):990–7. PMID: 18047197
54. Sougoufara S, Diédhiou SM, Doucouré S, Diagne N, Sembène PM, Harry M, et al (2014) Biting by *Anopheles funestus* in broad daylight after use of long-lasting insecticidal nets: a new challenge to malaria elimination. *Malaria Journal*; 13(1):125
55. Cohuet A, Simard F, Wondji CS, Antonio-Nkondjio C, Awono-Ambene P, Fontenille D (2004) High malaria transmission intensity due to *Anopheles funestus* (Diptera: Culicidae) in a village of savannah-forest transition area in Cameroon. *Journal of Medical Entomology*; 41(5):901–5 PMID: 15535619
56. Matowo NS, Moore J, Mapua S, Madumla EP, Moshi IR, Kaindoa EW, et al (2013) Using a new odour-baited device to explore options for luring and killing outdoor-biting malaria vectors: a report on design and field evaluation of the Mosquito Landing Box. *Parasites and vectors*; 6(1):1.
57. Matowo NS, Koekemoer LL, Moore SJ, Mmbando AS, Mapua SA, Coetzee M, et al (2016) Combining Synthetic Human Odours and Low-Cost Electrocuting Grids to Attract and Kill Outdoor-Biting Mosquitoes: Field and Semi-Field Evaluation of an Improved Mosquito Landing Box. *PLOS One*; 11(1):e0145653 <https://doi.org/10.1371/journal.pone.0145653> PMID: 26789733
58. Oxborough RM, Kitau J, Jones R, Feston E, Matowo J, Moshia FW, et al (2014) Long-lasting control of *Anopheles arabiensis* by a single spray application of micro-encapsulated pirimiphos-methyl (Actellic® 300 CS). *Malaria Journal*; 13(1):37

59. National Malaria Control Programme (NMCP) (2015) Tanzania Supplemental environmental assessment for indoor residual spraying for malaria control 2015–2020.
60. Killeen GF, Govella NJ, Lwetoijera DW, Okumu FO (2016) Most outdoor malaria transmission by behaviourally-resistant *Anopheles arabiensis* is mediated by mosquitoes that have previously been inside houses. *Malaria Journal*; 15(1):1
