# Supplementary material for: Interventions that effectively target Anopheles funestus mosquitoes could significantly improve control of persistent malaria transmission in south–eastern Tanzania
Source: PLoS One. 2017 May 18;12(5):e0177807. doi: 10.1371/journal.pone.0177807 (PMC5436825; doi:10.1371/journal.pone.0177807)
Supplement: S1 File — A file containing supplementary data depicting graphs used in this manuscript. (CSV) [file pone.0177807.s001.csv]

date	month	year	stausofhousehold	villagename	cluster	gambiaemales	gambiaeunfed	gambiaefed	gambiaepartfed	gambiaegravid	totalgambiae	gambsporozoite	fuestusmales	funestusunfed	funestusfed	funestuspartfed	funestusgravid	funestustotal	funestusporozoite
6/1/2016	Jan	2015	Random	kivukoni	6	0	0	0	0	0	0	0	0	0	0	0	0	0	2.816901408
6/1/2016	Jan	2015	Sentinel	kivukoni	6	0	0	0	0	0	0	0	0	0	0	0	0	0	2.816901408
6/1/2016	Jan	2015	Random	kivukoni	6	0	0	0	0	0	0	0	0	0	0	0	0	0	2.816901408
6/1/2016	Jan	2015	Sentinel	kivukoni	6	0	0	0	0	0	0	0	0	0	0	0	0	0	2.816901408
6/1/2016	Jan	2015	Random	kivukoni	6	0	0	0	0	0	0	0	0	0	0	0	0	0	2.816901408
6/1/2016	Jan	2015	Sentinel	kivukoni	6	0	0	0	0	0	0	0	0	0	0	0	0	0	2.816901408
7/1/2016	Jan	2015	Sentinel	mavimba	16	0	0	0	0	0	0	0	0	0	0	0	0	0	2.816901408
7/1/2016	Jan	2015	Sentinel	mavimba	16	0	0	0	0	0	0	0	0	0	0	0	0	0	2.816901408
7/1/2016	Jan	2015	Sentinel	mavimba	16	0	0	0	0	0	0	0	0	0	0	0	0	0	2.816901408
7/1/2016	Jan	2015	Random	mavimba	16	0	0	0	0	0	0	0	0	0	0	0	0	0	2.816901408
7/1/2016	Jan	2015	Random	mavimba	16	0	0	0	0	0	0	0	0	0	0	0	0	0	2.816901408
7/1/2016	Jan	2015	Random	mavimba	16	0	0	0	0	0	0	0	0	0	0	0	0	0	2.816901408
20/01/2015	Jan	2015	Sentinel	mavimba	13	0	1	0	0	0	1	0.20768432	0	2	0	0	0	2	0.680272109
20/01/2015	Jan	2015	Sentinel	mavimba	13	0	26	1	0	2	29	0.20768432	0	3	0	0	1	4	0.680272109
20/01/2015	Jan	2015	Sentinel	mavimba	13	0	10	0	0	1	11	0.20768432	0	4	0	0	0	4	0.680272109
20/01/2015	Jan	2015	Random	mavimba	13	0	28	0	0	0	28	0.20768432	0	3	0	0	0	3	0.680272109
20/01/2015	Jan	2015	Random	mavimba	13	0	5	0	0	0	5	0.20768432	0	1	0	0	0	1	0.680272109
20/01/2015	Jan	2015	Random	mavimba	13	0	0	0	0	0	0	0.20768432	0	0	0	0	0	0	0.680272109
21/01/2015	Jan	2015	Sentinel	mavimba	14	0	146	0	0	5	151	0.20768432	0	6	0	0	0	6	0.680272109
21/01/2015	Jan	2015	Sentinel	mavimba	14	1	113	0	0	0	113	0.20768432	0	1	0	0	0	1	0.680272109
21/01/2015	Jan	2015	Random	mavimba	14	0	64	0	0	0	64	0.20768432	0	4	0	0	0	4	0.680272109
21/01/2015	Jan	2015	Random	mavimba	14	0	43	1	0	0	44	0.20768432	0	8	0	0	0	8	0.680272109
21/01/2015	Jan	2015	Random	mavimba	14	0	3	0	0	0	3	0.20768432	0	0	0	0	0	0	0.680272109
21/01/2015	Jan	2015	Sentinel	mavimba	14	1	29	0	0	0	29	0.20768432	0	1	0	0	0	1	0.680272109
22/01/2015	Jan	2015	Sentinel	kivukoni	1	0	10	1	0	0	11	0.20768432	0	0	0	0	0	0	0.680272109
22/01/2015	Jan	2015	Sentinel	kivukoni	1	0	5	0	0	0	5	0.20768432	0	0	0	0	0	0	0.680272109
22/01/2015	Jan	2015	Random	kivukoni	1	0	19	1	0	0	20	0.20768432	0	0	0	0	0	0	0.680272109
22/01/2015	Jan	2015	Random	kivukoni	1	0	3	0	0	0	3	0.20768432	0	0	0	0	0	0	0.680272109
22/01/2015	Jan	2015	Random	kivukoni	1	1	7	0	0	1	8	0.20768432	0	0	0	0	0	0	0.680272109
22/01/2015	Jan	2015	Sentinel	kivukoni	1	0	7	0	0	0	7	0.20768432	0	1	0	0	0	1	0.680272109
23/01/2015	Jan	2015	Sentinel	kivukoni	6	4	1	0	0	0	1	0.20768432	0	0	0	0	0	0	0.680272109
23/01/2015	Jan	2015	Random	kivukoni	6	0	11	0	0	0	11	0.20768432	0	0	0	0	0	0	0.680272109
23/01/2015	Jan	2015	Random	kivukoni	6	0	5	0	0	0	5	0.20768432	0	0	0	0	0	0	0.680272109
23/01/2015	Jan	2015	Sentinel	kivukoni	6	0	8	0	0	0	8	0.20768432	0	0	0	0	0	0	0.680272109
23/01/2015	Jan	2015	Random	kivukoni	6	0	2	0	0	0	2	0.20768432	0	0	0	0	0	0	0.680272109
23/01/2015	Jan	2015	Sentinel	kivukoni	6	0	6	0	0	0	6	0.20768432	0	0	0	0	0	0	0.680272109
27/01/2015	Jan	2015	Sentinel	minepa	9	0	11	0	0	0	11	0.20768432	0	0	0	0	0	0	0.680272109
27/01/2015	Jan	2015	Random	minepa	9	0	0	0	0	0	0	0.20768432	0	0	0	0	0	0	0.680272109
27/01/2015	Jan	2015	Random	minepa	9	0	2	0	0	0	2	0.20768432	0	4	0	0	0	4	0.680272109
27/01/2015	Jan	2015	Sentinel	minepa	9	1	41	1	0	4	46	0.20768432	0	10	0	0	2	12	0.680272109
27/01/2015	Jan	2015	Sentinel	minepa	9	21	0	0	0	0	0	0.20768432	0	6	0	0	0	6	0.680272109
27/01/2015	Jan	2015	Random	minepa	9	0	13	0	0	0	13	0.20768432	0	7	0	0	0	7	0.680272109
28/01/2015	Jan	2015	Random	minepa	8	0	24	0	0	0	24	0.20768432	0	9	0	0	0	9	0.680272109
28/01/2015	Jan	2015	Sentinel	minepa	8	0	12	2	0	0	14	0.20768432	0	2	0	0	0	2	0.680272109
28/01/2015	Jan	2015	Random	minepa	8	0	0	0	0	1	1	0.20768432	0	6	0	0	1	7	0.680272109
28/01/2015	Jan	2015	Random	minepa	8	0	13	1	0	0	14	0.20768432	0	1	0	0	0	1	0.680272109
28/01/2015	Jan	2015	Sentinel	minepa	8	0	5	0	0	2	7	0.20768432	0	0	0	0	0	0	0.680272109
28/01/2015	Jan	2015	Sentinel	minepa	8	0	3	0	0	0	3	0.20768432	0	2	0	0	0	2	0.680272109
29/01/2015	Jan	2015	Sentinel	kivukoni	7	0	3	0	0	0	3	0.20768432	0	0	0	0	0	0	0.680272109
29/01/2015	Jan	2015	Random	kivukoni	7	0	0	0	0	0	0	0.20768432	0	0	0	0	0	0	0.680272109
29/01/2015	Jan	2015	Random	kivukoni	7	0	6	0	0	0	6	0.20768432	0	0	0	0	0	0	0.680272109
29/01/2015	Jan	2015	Random	kivukoni	7	0	3	1	0	0	4	0.20768432	0	0	0	0	0	0	0.680272109
29/01/2015	Jan	2015	Sentinel	kivukoni	7	0	0	0	0	0	0	0.20768432	0	0	0	0	0	0	0.680272109
29/01/2015	Jan	2015	Sentinel	kivukoni	7	0	32	1	0	0	33	0.20768432	0	4	0	0	0	4	0.680272109
30/01/2015	Jan	2015	Random	minepa	10	0	0	0	0	0	0	0.20768432	0	0	0	0	0	0	0.680272109
30/01/2015	Jan	2015	Random	minepa	10	3	63	28	0	11	102	0.20768432	3	5	2	0	0	7	0.680272109
30/01/2015	Jan	2015	Sentinel	minepa	10	1	14	2	0	0	16	0.20768432	0	0	0	0	0	0	0.680272109
30/01/2015	Jan	2015	Sentinel	minepa	10	0	22	0	0	0	22	0.20768432	0	41	0	0	0	41	0.680272109
30/01/2015	Jan	2015	Sentinel	minepa	10	2	3	0	0	0	3	0.20768432	0	0	0	0	0	0	0.680272109
30/01/2015	Jan	2015	Random	minepa	10	0	8	0	0	0	8	0.20768432	0	1	0	0	0	1	0.303951368
2/3/2015	Feb	2015	Random	kivukoni	7	0	1	0	0	0	1	0	0	0	0	0	0	0	0.303951368
2/3/2015	Feb	2015	Sentinel	kivukoni	7	0	0	0	0	0	0	0	0	0	0	0	0	0	0.303951368
2/3/2015	Feb	2015	Sentinel	kivukoni	7	0	28	0	0	0	28	0	0	5	0	0	0	5	0.303951368
2/3/2015	Feb	2015	Random	kivukoni	7	0	7	0	0	0	7	0	0	0	0	0	0	0	0.303951368
2/3/2015	Feb	2015	Random	kivukoni	7	0	3	0	0	0	3	0	0	2	0	0	0	2	0.303951368
2/3/2015	Feb	2015	Sentinel	kivukoni	7	0	3	0	0	0	3	0	0	0	0	0	0	0	0.303951368
2/4/2015	Feb	2015	Sentinel	kivukoni	3	0	0	0	0	0	0	0	0	0	0	0	0	0	0.303951368
2/4/2015	Feb	2015	Sentinel	kivukoni	3	0	0	0	0	0	0	0	0	0	0	0	0	0	0.303951368
2/4/2015	Feb	2015	Sentinel	kivukoni	3	0	1	0	0	0	1	0	0	0	0	0	0	0	0.303951368
2/4/2015	Feb	2015	Sentinel	kivukoni	3	0	2	0	0	0	2	0	0	0	0	0	0	0	0.303951368
2/4/2015	Feb	2015	Random	kivukoni	3	0	2	0	0	0	2	0	0	0	0	0	0	0	0.303951368
2/4/2015	Feb	2015	Random	kivukoni	3	0	0	0	0	0	0	0	0	0	0	0	0	0	0.303951368
2/5/2015	Feb	2015	Sentinel	minepa	8	0	0	0	0	0	0	0	0	0	0	0	0	0	0.303951368
2/5/2015	Feb	2015	Random	minepa	8	0	36	0	0	0	36	0	1	1	0	0	0	1	0.303951368
2/5/2015	Feb	2015	Random	minepa	8	0	16	0	0	0	16	0	0	6	0	0	0	6	0.303951368
2/5/2015	Feb	2015	Random	minepa	8	0	30	3	0	0	33	0	0	5	0	0	0	5	0.303951368
2/5/2015	Feb	2015	Sentinel	minepa	8	0	52	0	0	7	59	0	4	29	0	0	0	29	0.303951368
2/5/2015	Feb	2015	Sentinel	minepa	8	0	16	0	0	0	16	0	0	0	0	0	0	0	0.303951368
2/6/2015	Feb	2015	Sentinel	kivukoni	6	0	0	0	0	0	0	0	0	0	0	0	0	0	0.303951368
2/6/2015	Feb	2015	Random	kivukoni	6	0	0	0	0	1	1	0	0	0	0	0	0	0	0.303951368
2/6/2015	Feb	2015	Sentinel	kivukoni	6	0	0	0	0	0	0	0	0	1	0	0	0	1	0.303951368
2/6/2015	Feb	2015	Random	kivukoni	6	0	0	0	0	0	0	0	0	0	0	0	0	0	0.303951368
2/6/2015	Feb	2015	Random	kivukoni	6	0	2	0	0	0	2	0	0	3	0	0	0	3	0.303951368
2/6/2015	Feb	2015	Sentinel	kivukoni	6	0	3	0	5	0	8	0	0	0	0	0	0	0	0.303951368
2/10/2015	Feb	2015	Random	kivukoni	5	0	0	0	0	0	0	0	0	1	0	0	1	2	0.303951368
2/10/2015	Feb	2015	Random	kivukoni	5	0	2	0	0	0	2	0	0	0	0	0	0	0	0.303951368
2/10/2015	Feb	2015	Sentinel	kivukoni	5	0	13	2	0	0	15	0	0	1	1	0	0	2	0.303951368
2/10/2015	Feb	2015	Sentinel	kivukoni	5	0	1	0	0	0	1	0	0	1	0	0	0	1	0.303951368
2/10/2015	Feb	2015	Sentinel	kivukoni	5	0	0	0	0	0	0	0	0	0	0	0	0	0	0.303951368
2/10/2015	Feb	2015	Random	kivukoni	5	0	5	0	0	0	5	0	0	0	0	0	0	0	0.303951368
2/11/2015	Feb	2015	Random	kivukoni	4	0	0	0	0	0	0	0	0	2	0	0	0	2	0.303951368
2/11/2015	Feb	2015	Sentinel	kivukoni	4	0	1	0	0	0	1	0	0	1	0	0	0	1	0.303951368
2/11/2015	Feb	2015	Random	kivukoni	4	0	0	0	0	0	0	0	0	0	0	0	0	0	0.303951368
2/11/2015	Feb	2015	Random	kivukoni	4	0	0	0	0	0	0	0	0	0	0	0	0	0	0.303951368
2/11/2015	Feb	2015	Sentinel	kivukoni	4	0	2	0	0	0	2	0	0	0	0	0	0	0	0.303951368
2/11/2015	Feb	2015	Sentinel	kivukoni	4	0	1	0	0	0	1	0	0	1	0	0	0	1	0.303951368
2/12/2015	Feb	2015	Sentinel	minepa	10	0	4	0	0	0	4	0	2	0	0	0	0	0	0.303951368
2/12/2015	Feb	2015	Random	minepa	10	0	173	4	0	0	177	0	1	48	5	0	0	53	0.303951368
2/12/2015	Feb	2015	Sentinel	minepa	10	0	23	0	0	0	23	0	0	56	0	0	0	56	0.303951368
2/12/2015	Feb	2015	Sentinel	minepa	10	0	12	2	0	0	14	0	0	7	0	0	0	7	0.303951368
2/12/2015	Feb	2015	Random	minepa	10	0	39	14	0	4	57	0	0	6	1	0	0	7	0.303951368
2/12/2015	Feb	2015	Random	minepa	10	2	38	3	0	0	41	0	1	54	2	0	0	56	0.303951368
13/02/2015	Feb	2015	Sentinel	minepa	11	0	34	0	0	2	36	0	0	12	0	0	0	12	0.303951368
13/02/2015	Feb	2015	Random	minepa	11	6	68	0	0	2	70	0	0	69	0	0	0	69	0.303951368
13/02/2015	Feb	2015	Sentinel	minepa	11	0	8	0	0	0	8	0	0	9	0	0	0	9	0.303951368
13/02/2015	Feb	2015	Sentinel	minepa	11	0	20	0	0	0	20	0	0	4	0	0	0	4	0.303951368
13/02/2015	Feb	2015	Random	minepa	11	0	36	0	0	0	36	0	0	40	0	0	0	40	0.303951368
13/02/2015	Feb	2015	Random	minepa	11	0	9	0	0	0	9	0	0	4	0	0	0	4	0.303951368
17/02/2015	Feb	2015	Sentinel	mavimba	13	0	6	0	0	0	6	0	0	5	0	0	0	5	0.303951368
17/02/2015	Feb	2015	Random	mavimba	13	0	1	0	0	0	1	0	0	0	0	0	0	0	0.303951368
17/02/2015	Feb	2015	Random	mavimba	13	0	1	0	0	0	1	0	0	1	0	0	0	1	0.303951368
17/02/2015	Feb	2015	Sentinel	mavimba	13	0	0	0	0	0	0	0	0	1	0	0	0	1	0.303951368
17/02/2015	Feb	2015	Sentinel	mavimba	13	0	2	0	0	0	2	0	0	0	0	0	0	0	0.303951368
17/02/2015	Feb	2015	Random	mavimba	13	0	0	0	0	0	0	0	0	1	0	0	0	1	0.303951368
18/02/2015	Feb	2015	Random	kivukoni	1	0	0	0	0	1	1	0	0	0	0	0	1	1	0.303951368
18/02/2015	Feb	2015	Sentinel	kivukoni	1	0	0	0	0	0	0	0	0	26	11	0	0	37	0.303951368
18/02/2015	Feb	2015	Random	kivukoni	1	0	3	0	0	0	3	0	1	4	0	0	0	4	0.303951368
18/02/2015	Feb	2015	Sentinel	kivukoni	1	0	27	0	0	0	27	0	0	1	0	0	0	1	0.303951368
18/02/2015	Feb	2015	Sentinel	kivukoni	1	0	0	0	0	0	0	0	0	9	0	0	0	9	0.303951368
18/02/2015	Feb	2015	Random	kivukoni	1	0	0	0	0	0	0	0	0	0	0	0	0	0	0.303951368
19/02/2015	Feb	2015	Random	mavimba	16	0	1	0	0	0	1	0	0	1	0	0	0	1	0.303951368
19/02/2015	Feb	2015	Sentinel	mavimba	16	0	5	0	0	0	5	0	0	4	0	1	0	5	0.303951368
19/02/2015	Feb	2015	Sentinel	mavimba	16	0	1	0	0	0	1	0	0	2	0	0	0	2	0.303951368
19/02/2015	Feb	2015	Sentinel	mavimba	16	0	4	1	0	0	5	0	0	7	0	0	0	7	0.303951368
19/02/2015	Feb	2015	Random	mavimba	16	0	0	0	0	0	0	0	0	0	0	0	0	0	0.303951368
19/02/2015	Feb	2015	Random	mavimba	16	0	2	1	0	0	3	0	0	11	0	0	0	11	0.303951368
20/02/2015	Feb	2015	Random	kivukoni	2	0	1	0	0	0	1	0	0	2	0	0	0	2	0.303951368
20/02/2015	Feb	2015	Sentinel	kivukoni	2	0	0	0	0	0	0	0	2	0	0	0	0	0	0.303951368
20/02/2015	Feb	2015	Sentinel	kivukoni	2	0	5	0	0	0	5	0	0	6	0	0	0	6	0.303951368
20/02/2015	Feb	2015	Sentinel	kivukoni	2	1	0	0	0	0	0	0	0	0	0	0	0	0	0.303951368
20/02/2015	Feb	2015	Random	kivukoni	2	0	0	0	0	0	0	0	0	0	0	0	0	0	0.303951368
20/02/2015	Feb	2015	Random	kivukoni	2	0	1	0	0	0	1	0	0	1	0	0	0	1	0.303951368
24/02/2015	Feb	2015	Sentinel	minepa	9	0	29	0	0	1	30	0	0	6	0	0	0	6	0.303951368
24/02/2015	Feb	2015	Random	minepa	9	0	34	2	0	3	39	0	0	12	0	0	0	12	0.303951368
24/02/2015	Feb	2015	Random	minepa	9	0	93	6	0	0	99	0	0	6	1	0	0	7	0.303951368
24/02/2015	Feb	2015	Sentinel	minepa	9	0	80	0	0	0	80	0	0	12	0	0	0	12	0.303951368
24/02/2015	Feb	2015	Sentinel	minepa	9	0	71	0	0	0	71	0	0	4	0	0	1	5	0.303951368
24/02/2015	Feb	2015	Random	minepa	9	0	4	0	0	1	5	0	0	0	0	0	0	0	0.303951368
25/02/2015	Feb	2015	Random	minepa	12	0	0	0	0	0	0	0	0	0	0	0	0	0	0.303951368
25/02/2015	Feb	2015	Random	minepa	12	0	0	0	0	0	0	0	0	0	0	0	0	0	0.303951368
25/02/2015	Feb	2015	Sentinel	minepa	12	3	45	0	0	0	45	0	2	17	0	0	0	17	0.303951368
25/02/2015	Feb	2015	Sentinel	minepa	12	0	107	10	0	0	117	0	1	9	1	0	0	10	0.303951368
25/02/2015	Feb	2015	Sentinel	minepa	12	3	116	0	0	4	120	0	0	33	0	0	0	33	0.303951368
25/02/2015	Feb	2015	Random	minepa	12	0	45	4	0	0	49	0	1	52	2	0	0	54	0.303951368
26/02/2015	Feb	2015	Random	mavimba	15	0	3	0	0	0	3	0	0	0	0	0	0	0	0.303951368
26/02/2015	Feb	2015	Sentinel	mavimba	15	0	0	0	0	0	0	0	0	2	0	0	0	2	0.303951368
26/02/2015	Feb	2015	Sentinel	mavimba	15	0	1	2	0	0	3	0	0	0	0	0	0	0	0.303951368
26/02/2015	Feb	2015	Sentinel	mavimba	15	0	3	0	0	0	3	0	0	0	0	0	0	0	0.303951368
26/02/2015	Feb	2015	Random	mavimba	15	0	0	0	0	0	0	0	0	0	0	0	0	0	0.303951368
26/02/2015	Feb	2015	Random	mavimba	15	0	2	0	0	0	2	0	0	0	0	0	0	0	0.303951368
27/02/2015	Feb	2015	Random	mavimba	14	0	2	0	0	0	2	0	0	0	0	0	0	0	0.303951368
27/02/2015	Feb	2015	Random	mavimba	14	0	3	0	0	0	3	0	0	0	0	0	0	0	0.303951368
27/02/2015	Feb	2015	Sentinel	mavimba	14	0	107	10	0	0	117	0	1	9	1	0	0	10	0.303951368
27/02/2015	Feb	2015	Sentinel	mavimba	14	3	45	0	0	0	45	0	2	17	0	0	0	17	0.303951368
27/02/2015	Feb	2015	Sentinel	mavimba	14	0	0	0	0	0	0	0	0	0	0	0	0	0	0.303951368
27/02/2015	Feb	2015	Random	mavimba	14	0	0	0	0	0	0	0	0	0	0	0	0	0	0.303951368
3/3/2015	Mar	2015	Sentinel	minepa	12	2	4	0	0	4	8	0	0	0	0	0	0	0	0.401606426
3/3/2015	Mar	2015	Sentinel	minepa	12	2	10	0	0	0	10	0	0	0	0	0	0	0	0.401606426
3/3/2015	Mar	2015	Random	minepa	12	0	29	0	0	0	29	0	0	9	0	0	0	9	0.401606426
3/3/2015	Mar	2015	Random	minepa	12	4	396	0	0	1	397	0	0	20	0	0	0	20	0.401606426
3/3/2015	Mar	2015	Sentinel	minepa	12	0	61	0	0	5	66	0	1	32	2	0	2	36	0.401606426
3/3/2015	Mar	2015	Random	minepa	12	2	334	87	0	0	421	0	3	10	0	0	0	10	0.401606426
3/4/2015	Mar	2015	Sentinel	mavimba	16	2	2	0	0	0	2	0	0	6	0	0	0	6	0.401606426
3/4/2015	Mar	2015	Sentinel	mavimba	16	1	10	1	0	0	11	0	0	7	0	0	0	7	0.401606426
3/4/2015	Mar	2015	Random	mavimba	16	0	1	0	0	0	1	0	0	0	0	0	0	0	0.401606426
3/4/2015	Mar	2015	Random	mavimba	16	0	0	0	0	0	0	0	0	0	0	0	0	0	0.401606426
3/4/2015	Mar	2015	Sentinel	mavimba	16	0	5	0	0	0	5	0	0	18	0	0	0	18	0.401606426
3/4/2015	Mar	2015	Random	mavimba	16	0	0	0	0	0	0	0	0	0	0	0	0	0	0.401606426
3/5/2015	Mar	2015	Random	minepa	9	0	1	0	0	0	1	0	0	2	0	0	0	2	0.401606426
3/5/2015	Mar	2015	Random	minepa	9	0	13	1	0	0	14	0	2	1	0	0	0	1	0.401606426
3/5/2015	Mar	2015	Sentinel	minepa	9	0	3	0	0	0	3	0	0	5	0	0	0	5	0.401606426
3/5/2015	Mar	2015	Sentinel	minepa	9	0	8	0	2	0	10	0	0	5	0	0	0	5	0.401606426
3/5/2015	Mar	2015	Sentinel	minepa	9	0	19	2	0	0	21	0	0	12	0	0	0	12	0.401606426
3/5/2015	Mar	2015	Random	minepa	9	0	0	0	0	0	0	0	0	0	0	0	0	0	0.401606426
3/6/2015	Mar	2015	Random	minepa	10	2	1	1	0	0	2	0	0	0	0	0	0	0	0.401606426
3/6/2015	Mar	2015	Random	minepa	10	0	13	0	0	0	13	0	0	3	0	0	0	3	0.401606426
3/6/2015	Mar	2015	Random	minepa	10	0	0	0	0	0	0	0	0	2	0	0	0	2	0.401606426
3/6/2015	Mar	2015	Sentinel	minepa	10	0	10	4	2	0	16	0	0	5	0	0	0	5	0.401606426
3/6/2015	Mar	2015	Sentinel	minepa	10	0	49	7	1	0	57	0	0	3	0	0	1	4	0.401606426
3/6/2015	Mar	2015	Sentinel	minepa	10	0	0	0	0	0	0	0	0	0	0	0	0	0	0.401606426
3/10/2015	Mar	2015	Random	kivukoni	3	0	1	0	0	0	1	0	0	0	0	0	0	0	0.401606426
3/10/2015	Mar	2015	Sentinel	kivukoni	3	2	0	0	0	0	0	0	0	0	0	0	0	0	0.401606426
3/10/2015	Mar	2015	Sentinel	kivukoni	3	0	0	0	0	0	0	0	0	0	0	0	0	0	0.401606426
3/10/2015	Mar	2015	Sentinel	kivukoni	3	0	0	0	0	2	2	0	0	1	0	0	0	1	0.401606426
3/10/2015	Mar	2015	Random	kivukoni	3	0	1	0	0	0	1	0	0	0	0	0	0	0	0.401606426
3/10/2015	Mar	2015	Random	kivukoni	3	0	4	2	0	0	6	0	0	0	0	0	0	0	0.401606426
3/11/2015	Mar	2015	Sentinel	kivukoni	5	0	7	1	0	0	8	0	0	1	0	0	0	1	0.401606426
3/11/2015	Mar	2015	Sentinel	kivukoni	5	0	4	2	0	0	6	0	0	1	0	0	0	1	0.401606426
3/11/2015	Mar	2015	Random	kivukoni	5	0	21	5	3	0	29	0	0	0	0	0	0	0	0.401606426
3/11/2015	Mar	2015	Sentinel	kivukoni	5	0	4	0	0	1	5	0	0	1	0	0	0	1	0.401606426
3/11/2015	Mar	2015	Sentinel	kivukoni	5	0	1	0	0	0	1	0	0	0	0	0	0	0	0.401606426
3/11/2015	Mar	2015	Sentinel	kivukoni	5	2	0	0	0	0	0	0	0	0	0	0	0	0	0.401606426
3/12/2015	Mar	2015	Sentinel	mavimba	14	0	8	1	0	0	9	0	0	2	0	0	0	2	0.401606426
3/12/2015	Mar	2015	Random	mavimba	14	0	0	0	0	0	0	0	0	0	0	0	0	0	0.401606426
3/12/2015	Mar	2015	Random	mavimba	14	0	3	0	0	0	3	0	0	2	0	0	0	2	0.401606426
3/12/2015	Mar	2015	Sentinel	mavimba	14	0	2	0	0	0	2	0	0	0	0	0	0	0	0.401606426
3/12/2015	Mar	2015	Sentinel	mavimba	14	0	13	0	2	0	15	0	0	4	0	0	0	4	0.401606426
3/12/2015	Mar	2015	Random	mavimba	14	0	1	0	0	0	1	0	0	1	0	0	0	1	0.401606426
13/03/2015	Mar	2015	Random	mavimba	7	0	5	0	0	0	5	0	0	0	0	0	0	0	0.401606426
13/03/2015	Mar	2015	Random	kivukoni	7	0	44	2	0	0	46	0	0	5	3	0	0	8	0.401606426
13/03/2015	Mar	2015	Sentinel	kivukoni	7	0	24	3	0	0	27	0	0	8	0	0	0	8	0.401606426
13/03/2015	Mar	2015	Sentinel	kivukoni	7	0	20	3	1	0	24	0	0	13	1	0	0	14	0.401606426
13/03/2015	Mar	2015	Random	kivukoni	7	0	21	3	0	0	24	0	0	7	0	0	0	7	0.401606426
13/03/2015	Mar	2015	Sentinel	kivukoni	7	0	2	0	0	0	2	0	0	0	0	0	0	0	0.401606426
17/03/2015	Mar	2015	Sentinel	mavimba	13	0	1	0	0	0	1	0	0	2	0	0	0	2	0.401606426
17/03/2015	Mar	2015	Random	mavimba	13	0	2	0	0	0	2	0	0	1	0	0	0	1	0.401606426
17/03/2015	Mar	2015	Random	mavimba	13	1	0	0	0	0	0	0	0	0	0	0	0	0	0.401606426
17/03/2015	Mar	2015	Sentinel	mavimba	13	0	13	0	0	0	13	0	0	1	0	0	0	1	0.401606426
17/03/2015	Mar	2015	Sentinel	mavimba	13	0	0	1	0	0	1	0	0	0	0	0	0	0	0.401606426
17/03/2015	Mar	2015	Random	mavimba	13	0	13	1	2	0	16	0	0	0	0	0	0	0	0.401606426
19/03/2015	Mar	2015	Sentinel	kivukoni	6	0	13	0	1	0	14	0	0	3	0	0	0	3	0.401606426
19/03/2015	Mar	2015	Random	kivukoni	6	0	12	1	0	0	13	0	0	1	0	0	0	1	0.401606426
19/03/2015	Mar	2015	Random	kivukoni	6	0	1	0	0	0	1	0	0	0	0	0	0	0	0.401606426
19/03/2015	Mar	2015	Random	kivukoni	6	0	43	11	0	0	54	0	0	0	0	0	0	0	0.401606426
19/03/2015	Mar	2015	Sentinel	kivukoni	6	0	3	0	0	0	3	0	0	0	0	0	0	0	0.401606426
19/03/2015	Mar	2015	Sentinel	kivukoni	6	0	0	0	0	0	0	0	0	0	0	0	0	0	0.401606426
20/03/2015	Mar	2015	Random	minepa	8	0	29	0	0	0	29	0	0	10	0	0	0	10	0.401606426
20/03/2015	Mar	2015	Random	minepa	8	0	1	0	0	0	1	0	0	2	0	0	0	2	0.401606426
20/03/2015	Mar	2015	Sentinel	minepa	8	0	4	1	0	0	5	0	0	0	1	0	1	2	0.401606426
20/03/2015	Mar	2015	Random	minepa	8	0	19	8	0	0	27	0	0	6	0	0	0	6	0.401606426
20/03/2015	Mar	2015	Sentinel	minepa	8	0	70	6	0	0	76	0	0	17	0	0	0	17	0.401606426
20/03/2015	Mar	2015	Sentinel	minepa	8	0	24	0	0	0	24	0	0	0	0	0	0	0	0.401606426
21/03/2015	Mar	2015	Random	kivukoni	1	0	0	0	0	0	0	0	0	0	0	0	0	0	0.401606426
21/03/2015	Mar	2015	Sentinel	kivukoni	1	0	0	0	0	0	0	0	0	0	0	0	0	0	0.401606426
21/03/2015	Mar	2015	Sentinel	kivukoni	1	0	0	0	0	0	0	0	0	0	0	0	0	0	0.401606426
21/03/2015	Mar	2015	Random	kivukoni	1	0	0	0	0	0	0	0	0	0	0	0	0	0	0.401606426
21/03/2015	Mar	2015	Random	kivukoni	1	0	0	0	0	0	0	0	0	0	0	0	0	0	0.401606426
23/03/2015	Mar	2015	Random	mavimba	15	0	0	0	0	0	0	0	0	0	0	0	0	0	0.401606426
23/03/2015	Mar	2015	Random	mavimba	15	0	0	0	0	0	0	0	0	0	0	0	0	0	0.401606426
23/03/2015	Mar	2015	Sentinel	mavimba	15	0	0	0	0	0	0	0	0	0	0	0	0	0	0.401606426
23/03/2015	Mar	2015	Random	mavimba	15	0	2	0	0	0	2	0	0	0	0	0	0	0	0.401606426
23/03/2015	Mar	2015	Sentinel	mavimba	15	0	0	0	0	0	0	0	0	0	0	0	0	0	0.401606426
23/03/2015	Mar	2015	Sentinel	mavimba	15	0	0	0	0	0	0	0	0	0	0	0	0	0	0.401606426
24/03/2015	Mar	2015	Sentinel	minepa	11	0	0	0	0	0	0	0	0	0	0	0	0	0	0.401606426
24/03/2015	Mar	2015	Random	minepa	11	0	14	0	0	0	14	0	1	1	0	0	0	1	0.401606426
24/03/2015	Mar	2015	Random	minepa	11	0	17	0	0	0	17	0	1	1	0	0	0	1	0.401606426
24/03/2015	Mar	2015	Random	minepa	11	0	0	0	0	0	0	0	0	0	0	0	0	0	0.401606426
24/03/2015	Mar	2015	Random	minepa	11	0	63	0	1	0	64	0	0	1	0	0	0	1	0.401606426
24/03/2015	Mar	2015	Sentinel	minepa	11	1	127	0	3	0	130	0	0	3	0	0	0	3	0.401606426
26/03/2015	Mar	2015	Sentinel	kivukoni	2	0	13	0	0	0	13	0	0	0	0	0	0	0	0.401606426
26/03/2015	Mar	2015	Random	kivukoni	2	0	3	1	0	0	4	0	0	0	0	0	0	0	0.401606426
26/03/2015	Mar	2015	Random	kivukoni	2	0	85	1	4	0	90	0	0	0	0	0	0	0	0.401606426
26/03/2015	Mar	2015	Sentinel	kivukoni	2	3	27	0	3	0	30	0	0	0	0	0	0	0	0.401606426
26/03/2015	Mar	2015	Random	kivukoni	2	1	112	0	0	0	112	0	0	0	0	0	0	0	0.401606426
26/03/2015	Mar	2015	Sentinel	kivukoni	2	0	2	0	0	0	2	0	1	0	0	0	0	0	0.401606426
28/03/2015	Mar	2015	Sentinel	kivukoni	4	0	1	0	0	0	1	0	0	1	0	0	0	1	0.401606426
28/03/2015	Mar	2015	Random	kivukoni	4	0	0	0	0	0	0	0	0	0	0	0	0	0	0.401606426
28/03/2015	Mar	2015	Random	kivukoni	4	0	0	2	0	0	2	0	0	1	0	0	0	1	0.401606426
28/03/2015	Mar	2015	Random	kivukoni	4	0	6	0	0	0	6	0	0	0	0	0	0	0	0.401606426
28/03/2015	Mar	2015	Sentinel	kivukoni	4	0	2	0	0	0	2	0	0	0	0	0	0	0	0.401606426
28/03/2015	Mar	2015	Sentinel	kivukoni	4	0	13	0	0	0	13	0	0	0	0	0	0	0	0.401606426
31/03/2015	Mar	2015	Sentinel	kivukoni	6	0	1	0	0	0	1	0	0	0	0	0	0	0	0.401606426
31/03/2015	Mar	2015	Random	kivukoni	6	0	26	0	0	0	26	0	0	0	0	0	0	0	0.401606426
31/03/2015	Mar	2015	Random	kivukoni	6	0	0	0	0	0	0	0	0	0	0	0	0	0	0.401606426
31/03/2015	Mar	2015	Random	kivukoni	6	0	0	0	0	0	0	0	0	1	0	0	0	1	0.401606426
31/03/2015	Mar	2015	Sentinel	kivukoni	6	0	0	0	0	0	0	0	0	0	0	0	0	0	0.401606426
31/03/2015	Mar	2015	Sentinel	kivukoni	6	0	1	0	0	0	1	0	0	0	0	0	0	0	0.401606426
4/1/2015	Apr	2015	Sentinel	mavimba	15	0	0	0	0	0	0	0	0	0	0	0	0	0	1.243339254
4/1/2015	Apr	2015	Sentinel	mavimba	15	0	18	0	0	0	18	0	0	3	0	0	0	3	1.243339254
4/1/2015	Apr	2015	Random	mavimba	15	0	1	0	0	0	1	0	0	0	0	0	0	0	1.243339254
4/1/2015	Apr	2015	Random	mavimba	15	0	7	0	0	0	7	0	0	1	0	0	0	1	1.243339254
4/1/2015	Apr	2015	Random	mavimba	15	0	2	0	0	0	2	0	0	1	0	0	0	1	1.243339254
4/1/2015	Apr	2015	Sentinel	mavimba	15	0	24	0	0	0	24	0	0	6	0	0	0	6	1.243339254
4/2/2015	Apr	2015	Sentinel	kivukoni	5	0	0	0	0	0	0	0	0	0	0	0	0	0	1.243339254
4/2/2015	Apr	2015	Sentinel	kivukoni	5	0	28	0	0	0	28	0	0	0	0	0	0	0	1.243339254
4/2/2015	Apr	2015	Sentinel	kivukoni	5	0	26	0	0	0	26	0	1	0	0	0	0	0	1.243339254
4/2/2015	Apr	2015	Random	kivukoni	5	0	35	2	1	0	38	0	0	2	0	0	0	2	1.243339254
4/2/2015	Apr	2015	Random	kivukoni	5	0	29	0	0	3	32	0	0	7	0	0	0	7	1.243339254
4/2/2015	Apr	2015	Random	kivukoni	5	0	126	0	0	0	126	0	0	0	0	0	0	0	1.243339254
4/3/2015	Apr	2015	Random	minepa	10	0	2	0	0	0	2	0	0	0	1	0	0	1	1.243339254
4/3/2015	Apr	2015	Sentinel	minepa	10	0	2	0	0	0	2	0	0	0	0	0	0	0	1.243339254
4/3/2015	Apr	2015	Sentinel	minepa	10	0	26	0	0	0	26	0	1	14	1	0	2	17	1.243339254
4/3/2015	Apr	2015	Random	minepa	10	0	26	2	0	0	28	0	0	5	0	0	1	6	1.243339254
4/3/2015	Apr	2015	Random	minepa	10	0	2	0	0	0	2	0	0	6	0	0	0	6	1.243339254
4/3/2015	Apr	2015	Sentinel	minepa	10	0	13	0	0	0	13	0	0	12	0	0	0	12	1.243339254
4/7/2015	Apr	2015	Sentinel	kivukoni	6	0	0	0	0	0	0	0	0	0	0	0	0	0	1.243339254
4/7/2015	Apr	2015	Random	kivukoni	6	0	0	0	0	0	0	0	0	0	0	0	0	0	1.243339254
4/7/2015	Apr	2015	Random	kivukoni	6	11	17	0	0	0	17	0	0	0	0	0	0	0	1.243339254
4/7/2015	Apr	2015	Sentinel	kivukoni	6	0	8	0	0	0	8	0	0	0	0	0	0	0	1.243339254
4/7/2015	Apr	2015	Sentinel	kivukoni	6	0	8	0	0	0	8	0	0	5	0	0	0	5	1.243339254
4/7/2015	Apr	2015	Random	kivukoni	6	0	17	0	0	0	17	0	0	7	0	0	0	7	1.243339254
4/8/2015	Apr	2015	Sentinel	minepa	12	0	9	0	0	0	9	0	0	5	0	0	0	5	1.243339254
4/8/2015	Apr	2015	Sentinel	minepa	12	0	30	0	0	0	30	0	0	7	0	0	0	7	1.243339254
4/8/2015	Apr	2015	Random	minepa	12	0	50	0	0	0	50	0	0	0	0	0	0	0	1.243339254
4/8/2015	Apr	2015	Sentinel	minepa	12	0	3	0	0	0	3	0	0	0	0	0	0	0	1.243339254
4/8/2015	Apr	2015	Random	minepa	12	0	0	0	0	0	0	0	0	3	0	0	0	3	1.243339254
4/8/2015	Apr	2015	Random	minepa	12	0	41	0	0	0	41	0	0	30	0	0	0	30	1.243339254
4/9/2015	Apr	2015	Sentinel	minepa	9	0	22	0	0	0	22	0	0	51	0	0	0	51	1.243339254
4/9/2015	Apr	2015	Sentinel	minepa	9	0	1	0	0	0	1	0	0	25	0	0	0	25	1.243339254
4/9/2015	Apr	2015	Sentinel	minepa	9	1	17	0	0	0	17	0	0	11	0	0	0	11	1.243339254
4/9/2015	Apr	2015	Random	minepa	9	0	0	0	0	0	0	0	0	1	0	0	0	1	1.243339254
4/9/2015	Apr	2015	Random	minepa	9	0	60	9	0	0	69	0	0	10	0	0	0	10	1.243339254
4/9/2015	Apr	2015	Random	minepa	9	0	23	0	0	0	23	0	0	8	0	0	0	8	1.243339254
4/10/2015	Apr	2015	Sentinel	mavimba	14	0	16	0	0	0	16	0	0	3	0	0	0	3	1.243339254
4/10/2015	Apr	2015	Random	mavimba	14	0	27	0	0	0	27	0	0	23	2	0	0	25	1.243339254
4/10/2015	Apr	2015	Sentinel	mavimba	14	0	12	1	0	0	13	0	2	4	0	0	0	4	1.243339254
4/10/2015	Apr	2015	Sentinel	mavimba	14	0	0	0	0	0	0	0	0	0	0	0	0	0	1.243339254
4/10/2015	Apr	2015	Random	mavimba	14	0	0	0	0	0	0	0	0	0	0	0	0	0	1.243339254
4/10/2015	Apr	2015	Random	mavimba	14	1	81	0	0	0	81	0	0	52	0	0	0	52	1.243339254
14/04/2015	Apr	2015	Random	mavimba	13	0	24	1	0	0	25	0	0	1	1	0	0	2	1.243339254
14/04/2015	Apr	2015	Sentinel	mavimba	13	0	0	0	0	0	0	0	0	3	0	0	0	3	1.243339254
14/04/2015	Apr	2015	Sentinel	mavimba	13	0	2	0	0	0	2	0	0	6	0	0	0	6	1.243339254
14/04/2015	Apr	2015	Random	mavimba	13	0	13	0	0	0	13	0	0	6	0	0	0	6	1.243339254
14/04/2015	Apr	2015	Random	mavimba	13	0	0	0	0	0	0	0	0	0	0	0	0	0	1.243339254
14/04/2015	Apr	2015	Sentinel	mavimba	13	0	4	1	0	0	5	0	0	0	0	0	0	0	1.243339254
15/04/2015	Apr	2015	Sentinel	kivukoni	1	0	3	1	0	0	4	0	0	0	0	0	0	0	1.243339254
15/04/2015	Apr	2015	Sentinel	kivukoni	1	0	1	0	0	0	1	0	0	0	0	0	0	0	1.243339254
15/04/2015	Apr	2015	Random	kivukoni	1	0	15	0	0	0	15	0	0	5	0	0	0	5	1.243339254
15/04/2015	Apr	2015	Sentinel	kivukoni	1	0	10	0	0	0	10	0	0	1	0	0	0	1	1.243339254
15/04/2015	Apr	2015	Random	kivukoni	1	0	9	0	0	0	9	0	0	2	0	0	0	2	1.243339254
15/04/2015	Apr	2015	Random	kivukoni	1	0	11	3	0	0	14	0	0	4	1	0	2	7	1.243339254
16/04/2015	Apr	2015	Sentinel	minepa	11	0	0	0	0	0	0	0	0	0	0	0	0	0	1.243339254
16/04/2015	Apr	2015	Random	minepa	11	0	0	0	0	0	0	0	0	0	0	0	0	0	1.243339254
16/04/2015	Apr	2015	Sentinel	minepa	11	0	0	0	0	0	0	0	0	0	0	0	0	0	1.243339254
16/04/2015	Apr	2015	Random	minepa	11	0	0	0	0	0	0	0	0	0	0	0	0	0	1.243339254
16/04/2015	Apr	2015	Random	minepa	11	0	0	0	0	0	0	0	0	0	0	0	0	0	1.243339254
16/04/2015	Apr	2015	Sentinel	minepa	11	0	0	0	0	0	0	0	0	0	0	0	0	0	1.243339254
17/04/2015	Apr	2015	Sentinel	mavimba	16	0	3	0	0	0	3	0	0	4	0	0	0	4	1.243339254
17/04/2015	Apr	2015	Random	mavimba	16	0	13	0	0	0	13	0	0	46	0	0	0	46	1.243339254
17/04/2015	Apr	2015	Sentinel	mavimba	16	0	9	1	0	0	10	0	0	16	1	0	0	17	1.243339254
17/04/2015	Apr	2015	Random	mavimba	16	1	8	0	0	0	8	0	0	10	1	0	0	11	1.243339254
17/04/2015	Apr	2015	Sentinel	mavimba	16	0	6	0	0	0	6	0	0	5	0	0	0	5	1.243339254
17/04/2015	Apr	2015	Random	mavimba	16	0	24	1	0	0	25	0	0	0	0	0	0	0	1.243339254
21/4/205	Apr	2015	Random	minepa	8	0	35	0	0	0	35	0	1	5	1	0	0	6	1.243339254
21/4/205	Apr	2015	Sentinel	minepa	8	0	40	0	0	0	40	0	0	4	0	0	0	4	1.243339254
21/4/205	Apr	2015	Random	minepa	8	0	20	0	0	0	20	0	0	3	0	0	0	3	1.243339254
21/4/205	Apr	2015	Sentinel	minepa	8	0	2	1	0	0	3	0	0	0	0	0	0	0	1.243339254
21/4/205	Apr	2015	Sentinel	minepa	8	10	100	0	0	0	100	0	8	30	0	0	0	30	1.243339254
21/4/205	Apr	2015	Random	minepa	8	0	40	0	0	0	40	0	0	8	0	0	0	8	1.243339254
22/04/2015	Apr	2015	Random	kivukoni	7	0	12	0	0	0	12	0	0	0	0	0	0	0	1.243339254
22/04/2015	Apr	2015	Random	kivukoni	7	0	20	0	0	0	20	0	0	30	0	0	0	30	1.243339254
22/04/2015	Apr	2015	Sentinel	kivukoni	7	0	5	0	0	0	5	0	0	0	0	0	0	0	1.243339254
22/04/2015	Apr	2015	Sentinel	kivukoni	7	0	53	0	0	0	53	0	0	13	0	0	0	13	1.243339254
22/04/2015	Apr	2015	Random	kivukoni	7	0	60	0	0	0	60	0	0	26	0	0	0	26	1.243339254
22/04/2015	Apr	2015	Sentinel	kivukoni	7	0	2	0	0	0	2	0	0	6	1	0	0	7	1.243339254
23/04/2015	Apr	2015	Random	kivukoni	4	0	1	0	0	0	1	0	0	0	0	0	0	0	1.243339254
23/04/2015	Apr	2015	Random	kivukoni	4	11	14	0	0	0	14	0	0	3	0	0	0	3	1.243339254
23/04/2015	Apr	2015	Sentinel	kivukoni	4	0	2	0	0	0	2	0	0	0	0	0	0	0	1.243339254
23/04/2015	Apr	2015	Random	kivukoni	4	2	9	0	0	0	9	0	0	0	0	0	0	0	1.243339254
23/04/2015	Apr	2015	Sentinel	kivukoni	4	0	6	0	0	0	6	0	0	0	0	0	0	0	1.243339254
23/04/2015	Apr	2015	Sentinel	kivukoni	4	1	0	0	0	0	0	0	0	0	0	0	0	0	1.243339254
24/04/2015	Apr	2015	Random	kivukoni	2	0	10	0	0	0	10	0	0	3	0	0	0	3	1.243339254
24/04/2015	Apr	2015	Sentinel	kivukoni	2	0	0	0	0	0	0	0	0	0	0	0	0	0	1.243339254
24/04/2015	Apr	2015	Sentinel	kivukoni	2	0	3	0	0	0	3	0	0	0	0	0	0	0	1.243339254
24/04/2015	Apr	2015	Random	kivukoni	2	0	63	1	0	0	64	0	0	2	0	0	2	4	1.243339254
24/04/2015	Apr	2015	Random	kivukoni	2	0	7	0	0	0	7	0	0	2	0	0	0	2	1.243339254
24/04/2015	Apr	2015	Random	kivukoni	2	0	2	0	0	0	2	0	0	0	0	0	0	0	1.243339254
5/5/2015	May	2015	Random	minepa	11	0	21	1	0	0	22	0.01435132	0	1	0	0	2	3	0.348432056
5/5/2015	May	2015	Sentinel	minepa	11	9	0	0	0	0	0	0.01435132	9	9	0	0	0	9	0.348432056
5/5/2015	May	2015	Random	minepa	11	0	12	0	0	0	12	0.01435132	0	8	0	0	0	8	0.348432056
5/5/2015	May	2015	Random	minepa	11	0	23	1	0	0	24	0.01435132	0	3	1	0	0	4	0.348432056
5/5/2015	May	2015	Sentinel	minepa	11	0	312	11	0	2	325	0.01435132	0	35	0	0	0	35	0.348432056
5/5/2015	May	2015	Sentinel	minepa	11	0	26	0	0	0	26	0.01435132	0	4	0	0	0	4	0.348432056
5/6/2015	May	2015	Random	kivukoni	5	0	8	0	0	0	8	0.01435132	0	0	0	0	0	0	0.348432056
5/6/2015	May	2015	Sentinel	kivukoni	5	0	3	0	0	0	3	0.01435132	0	2	0	0	0	2	0.348432056
5/6/2015	May	2015	Sentinel	kivukoni	5	0	74	0	0	0	74	0.01435132	0	10	0	0	0	10	0.348432056
5/6/2015	May	2015	Random	kivukoni	5	0	0	0	0	0	0	0.01435132	0	1	0	0	0	1	0.348432056
5/6/2015	May	2015	Random	kivukoni	5	0	63	0	0	0	63	0.01435132	0	6	0	0	0	6	0.348432056
5/6/2015	May	2015	Sentinel	kivukoni	5	0	116	0	5	0	121	0.01435132	0	5	0	0	0	5	0.348432056
5/7/2015	May	2015	Random	kivukoni	6	1	9	0	0	0	9	0.01435132	0	3	0	0	0	3	0.348432056
5/7/2015	May	2015	Random	kivukoni	6	0	0	0	0	0	0	0.01435132	0	0	0	0	0	0	0.348432056
5/7/2015	May	2015	Sentinel	kivukoni	6	1	50	0	0	0	50	0.01435132	0	1	0	0	0	1	0.348432056
5/7/2015	May	2015	Sentinel	kivukoni	6	0	10	2	0	0	12	0.01435132	0	0	0	0	0	0	0.348432056
5/7/2015	May	2015	Random	kivukoni	6	0	5	0	0	0	5	0.01435132	0	1	0	0	0	1	0.348432056
5/7/2015	May	2015	Sentinel	kivukoni	6	0	68	0	0	0	68	0.01435132	0	0	0	0	0	0	0.348432056
5/8/2015	May	2015	Sentinel	mavimba	15	0	0	0	0	0	0	0.01435132	0	0	0	0	0	0	0.348432056
5/8/2015	May	2015	Random	mavimba	15	0	0	0	0	0	0	0.01435132	0	0	0	0	0	0	0.348432056
5/8/2015	May	2015	Random	mavimba	15	0	0	0	0	0	0	0.01435132	0	0	0	0	0	0	0.348432056
5/8/2015	May	2015	Sentinel	mavimba	15	0	10	0	0	0	10	0.01435132	0	0	0	0	0	0	0.348432056
5/8/2015	May	2015	Sentinel	mavimba	15	0	14	1	0	0	15	0.01435132	0	0	0	0	0	0	0.348432056
5/8/2015	May	2015	Random	mavimba	15	0	0	0	0	0	0	0.01435132	0	0	0	0	0	0	0.348432056
5/12/2015	May	2015	Random	minepa	12	1	80	0	0	0	80	0.01435132	0	15	0	0	0	15	0.348432056
5/12/2015	May	2015	Sentinel	minepa	12	0	120	0	0	0	120	0.01435132	0	17	0	0	0	17	0.348432056
5/12/2015	May	2015	Sentinel	minepa	12	0	75	1	0	0	76	0.01435132	0	2	0	0	0	2	0.348432056
5/12/2015	May	2015	Random	minepa	12	0	18	0	0	0	18	0.01435132	0	0	0	0	0	0	0.348432056
5/12/2015	May	2015	Sentinel	minepa	12	0	30	0	0	0	30	0.01435132	0	0	0	0	0	0	0.348432056
5/12/2015	May	2015	Random	minepa	12	0	234	0	0	0	234	0.01435132	0	56	0	0	0	56	0.348432056
13/05/2015	May	2015	Random	kivukoni	7	0	122	3	0	0	125	0.01435132	0	20	0	0	0	20	0.348432056
13/05/2015	May	2015	Sentinel	kivukoni	7	0	9	0	0	0	9	0.01435132	0	7	0	0	0	7	0.348432056
13/05/2015	May	2015	Sentinel	kivukoni	7	0	1020	10	0	0	1030	0.01435132	0	48	0	0	0	48	0.348432056
13/05/2015	May	2015	Random	kivukoni	7	0	21	0	0	0	21	0.01435132	0	2	0	0	0	2	0.348432056
13/05/2015	May	2015	Random	kivukoni	7	0	594	0	0	0	594	0.01435132	0	20	0	0	0	20	0.348432056
13/05/2015	May	2015	Sentinel	kivukoni	7	1	380	2	0	0	382	0.01435132	0	34	0	0	0	34	0.348432056
14/05/2015	May	2015	Sentinel	mavimba	13	0	26	0	0	0	26	0.01435132	0	7	0	0	0	7	0.348432056
14/05/2015	May	2015	Random	mavimba	13	0	14	0	1	0	15	0.01435132	0	4	0	0	0	4	0.348432056
14/05/2015	May	2015	Random	mavimba	13	0	59	0	0	0	59	0.01435132	0	5	0	0	0	5	0.348432056
14/05/2015	May	2015	Sentinel	mavimba	13	0	4	0	0	0	4	0.01435132	0	4	0	0	0	4	0.348432056
14/05/2015	May	2015	Sentinel	mavimba	13	0	2	0	0	0	2	0.01435132	0	0	0	0	0	0	0.348432056
14/05/2015	May	2015	Random	mavimba	13	0	178	0	0	0	178	0.01435132	1	18	0	0	0	18	0.348432056
15/05/2015	May	2015	Random	kivukoni	2	0	12	0	0	0	12	0.01435132	0	0	0	0	0	0	0.348432056
15/05/2015	May	2015	Sentinel	kivukoni	2	0	16	0	0	0	16	0.01435132	0	1	0	0	0	1	0.348432056
15/05/2015	May	2015	Sentinel	kivukoni	2	0	13	0	0	0	13	0.01435132	0	0	0	0	0	0	0.348432056
15/05/2015	May	2015	Sentinel	kivukoni	2	0	28	0	0	0	28	0.01435132	0	0	0	0	0	0	0.348432056
15/05/2015	May	2015	Random	kivukoni	2	0	184	0	0	0	184	0.01435132	0	0	0	0	0	0	0.348432056
15/05/2015	May	2015	Random	kivukoni	2	1	852	23	0	0	875	0.01435132	0	13	0	0	0	13	0.348432056
19/05/2015	May	2015	Sentinel	kivukoni	3	0	6	0	0	0	6	0.01435132	0	0	1	0	0	1	0.348432056
19/05/2015	May	2015	Random	kivukoni	3	0	0	0	0	0	0	0.01435132	0	0	0	0	0	0	0.348432056
19/05/2015	May	2015	Sentinel	kivukoni	3	0	0	0	0	0	0	0.01435132	0	0	0	0	0	0	0.348432056
19/05/2015	May	2015	Random	kivukoni	3	0	25	0	0	0	25	0.01435132	0	3	0	0	0	3	0.348432056
19/05/2015	May	2015	Random	kivukoni	3	0	27	0	0	0	27	0.01435132	0	1	0	0	0	1	0.348432056
19/05/2015	May	2015	Sentinel	kivukoni	3	0	0	0	0	0	0	0.01435132	0	2	0	0	0	2	0.348432056
20/05/2015	May	2015	Sentinel	mavimba	14	1	7	0	0	0	7	0.01435132	0	8	0	0	0	8	0.348432056
20/05/2015	May	2015	Random	mavimba	14	0	1	0	0	0	1	0.01435132	0	3	2	0	0	5	0.348432056
20/05/2015	May	2015	Sentinel	mavimba	14	0	10	0	0	0	10	0.01435132	1	9	0	0	0	9	0.348432056
20/05/2015	May	2015	Random	mavimba	14	0	59	0	0	0	59	0.01435132	0	3	0	0	0	3	0.348432056
20/05/2015	May	2015	Sentinel	mavimba	14	0	33	0	0	0	33	0.01435132	0	4	0	0	0	4	0.348432056
20/05/2015	May	2015	Random	mavimba	14	0	39	0	0	0	39	0.01435132	0	34	0	0	0	34	0.348432056
21/05/2015	May	2015	Random	mavimba	16	0	8	0	0	1	9	0.01435132	0	10	0	0	3	13	0.348432056
21/05/2015	May	2015	Sentinel	mavimba	16	0	0	0	0	0	0	0.01435132	0	5	0	0	0	5	0.348432056
21/05/2015	May	2015	Random	mavimba	16	0	1	0	0	0	1	0.01435132	0	0	0	0	0	0	0.348432056
21/05/2015	May	2015	Sentinel	mavimba	16	0	5	0	0	0	5	0.01435132	0	4	0	0	0	4	0.348432056
21/05/2015	May	2015	Random	mavimba	16	0	9	0	0	0	9	0.01435132	0	32	0	0	0	32	0.348432056
21/05/2015	May	2015	Sentinel	mavimba	16	0	0	0	0	0	0	0.01435132	0	0	0	0	0	0	0.348432056
22/05/2015	May	2015	Random	kivukoni	4	0	1	0	0	0	1	0.01435132	0	0	0	0	0	0	0.348432056
22/05/2015	May	2015	Sentinel	kivukoni	4	0	22	0	0	0	22	0.01435132	0	10	0	0	0	10	0.348432056
22/05/2015	May	2015	Random	kivukoni	4	1	15	1	0	0	16	0.01435132	1	4	0	0	0	4	0.348432056
22/05/2015	May	2015	Random	kivukoni	4	0	140	0	0	0	140	0.01435132	0	4	0	0	0	4	0.348432056
22/05/2015	May	2015	Sentinel	kivukoni	4	2	49	3	0	0	52	0.01435132	0	12	0	0	0	12	0.348432056
22/05/2015	May	2015	Sentinel	kivukoni	4	0	0	0	0	0	0	0.01435132	0	0	0	0	0	0	0.348432056
26/05/2015	May	2015	Random	kivukoni	1	0	62	2	0	0	64	0.01435132	0	16	0	0	0	16	0.348432056
26/05/2015	May	2015	Sentinel	kivukoni	1	0	130	0	0	0	130	0.01435132	0	16	0	0	0	16	0.348432056
26/05/2015	May	2015	Random	kivukoni	1	0	1	0	0	0	1	0.01435132	0	0	0	0	0	0	0.348432056
26/05/2015	May	2015	Random	kivukoni	1	0	8	1	0	0	9	0.01435132	0	17	0	0	0	17	0.348432056
26/05/2015	May	2015	Sentinel	kivukoni	1	0	191	0	0	0	191	0.01435132	0	11	0	0	0	11	0.348432056
26/05/2015	May	2015	Sentinel	kivukoni	1	0	168	1	0	0	169	0.01435132	0	7	0	3	0	10	0.348432056
27/05/2015	May	2015	Sentinel	minepa	10	0	2	0	0	0	2	0.01435132	0	3	0	0	0	3	0.348432056
27/05/2015	May	2015	Random	minepa	10	0	75	4	0	0	79	0.01435132	3	23	0	0	0	23	0.348432056
27/05/2015	May	2015	Random	minepa	10	1	7	0	0	0	7	0.01435132	0	6	0	0	0	6	0.348432056
27/05/2015	May	2015	Sentinel	minepa	10	0	94	0	0	0	94	0.01435132	0	29	0	0	0	29	0.348432056
27/05/2015	May	2015	Random	minepa	10	0	138	3	0	0	141	0.01435132	0	19	0	0	0	19	0.348432056
27/05/2015	May	2015	Sentinel	minepa	10	0	22	0	0	0	22	0.01435132	0	15	0	0	0	15	0.348432056
28/05/2015	May	2015	Sentinel	minepa	9	0	5	0	0	0	5	0.01435132	0	18	0	0	0	18	0.348432056
28/05/2015	May	2015	Random	minepa	9	0	60	4	0	0	64	0.01435132	0	70	0	0	0	70	0.348432056
28/05/2015	May	2015	Random	minepa	9	0	14	0	0	0	14	0.01435132	0	10	0	0	0	10	0.348432056
28/05/2015	May	2015	Sentinel	minepa	9	0	112	13	4	0	129	0.01435132	1	81	0	0	0	81	0.348432056
28/05/2015	May	2015	Sentinel	minepa	9	0	55	0	0	0	55	0.01435132	0	60	0	0	0	60	0.348432056
28/05/2015	May	2015	Random	minepa	9	0	5	0	0	0	5	0.01435132	0	3	0	0	0	3	0.348432056
29/05/2015	May	2015	Random	minepa	8	0	148	5	0	0	153	0.01435132	0	68	2	0	0	70	0.348432056
29/05/2015	May	2015	Sentinel	minepa	8	0	53	0	0	0	53	0.01435132	0	26	0	0	0	26	0.348432056
29/05/2015	May	2015	Sentinel	minepa	8	0	51	1	0	0	52	0.01435132	0	97	5	0	0	102	0.348432056
29/05/2015	May	2015	Random	minepa	8	0	1	0	0	0	1	0.01435132	0	5	0	0	0	5	0.348432056
29/05/2015	May	2015	Random	minepa	8	0	58	0	0	0	58	0.01435132	0	0	0	0	0	0	0.348432056
29/05/2015	May	2015	Sentinel	minepa	8	0	25	0	0	0	25	0.01435132	0	17	2	0	0	19	0.348432056
6/2/2015	Jun	2015	Random	minepa	8	0	17	0	0	0	17	0	1	15	0	0	0	15	0.455062571
6/2/2015	Jun	2015	Sentinel	minepa	8	0	59	0	0	0	59	0	0	40	0	0	0	40	0.455062571
6/2/2015	Jun	2015	Random	minepa	8	0	144	2	0	0	146	0	3	57	0	1	0	58	0.455062571
6/2/2015	Jun	2015	Sentinel	minepa	8	0	199	7	0	0	206	0	0	20	1	0	0	21	0.455062571
6/2/2015	Jun	2015	Sentinel	minepa	8	2	444	6	0	6	456	0	1	105	3	0	0	108	0.455062571
6/2/2015	Jun	2015	Random	minepa	8	1	48	0	0	0	48	0	1	34	0	0	0	34	0.455062571
6/3/2015	Jun	2015	Sentinel	kivukoni	6	0	24	1	0	0	25	0	0	4	0	0	0	4	0.455062571
6/3/2015	Jun	2015	Random	kivukoni	6	0	0	0	0	0	0	0	0	2	0	0	0	2	0.455062571
6/3/2015	Jun	2015	Random	kivukoni	6	0	6	0	0	0	6	0	0	8	0	0	0	8	0.455062571
6/3/2015	Jun	2015	Sentinel	kivukoni	6	0	1	0	0	0	1	0	0	1	0	0	0	1	0.455062571
6/3/2015	Jun	2015	Random	kivukoni	6	0	50	0	0	0	50	0	0	30	0	0	0	30	0.455062571
6/3/2015	Jun	2015	Sentinel	kivukoni	6	0	0	0	0	0	0	0	0	0	0	0	0	0	0.455062571
6/4/2015	Jun	2015	Random	kivukoni	1	0	8	0	0	0	8	0	0	3	0	0	0	3	0.455062571
6/4/2015	Jun	2015	Sentinel	kivukoni	1	0	11	0	0	0	11	0	0	3	0	0	0	3	0.455062571
6/4/2015	Jun	2015	Random	kivukoni	1	0	10	0	0	0	10	0	0	34	3	0	0	37	0.455062571
6/4/2015	Jun	2015	Sentinel	kivukoni	1	0	2	0	0	0	2	0	0	40	0	0	4	44	0.455062571
6/4/2015	Jun	2015	Random	kivukoni	1	0	10	0	0	0	10	0	0	1	0	0	0	1	0.455062571
6/4/2015	Jun	2015	Sentinel	kivukoni	1	0	106	0	0	1	107	0	0	5	0	0	0	5	0.455062571
6/5/2015	Jun	2015	Random	mavimba	16	0	2	0	0	0	2	0	0	6	0	0	0	6	0.455062571
6/5/2015	Jun	2015	Sentinel	mavimba	16	0	0	0	0	0	0	0	0	0	0	0	0	0	0.455062571
6/5/2015	Jun	2015	Random	mavimba	16	0	2	0	0	0	2	0	0	3	0	0	0	3	0.455062571
6/5/2015	Jun	2015	Random	mavimba	16	0	8	0	0	0	8	0	0	29	1	0	2	32	0.455062571
6/5/2015	Jun	2015	Sentinel	mavimba	16	0	0	0	0	0	0	0	0	1	0	0	0	1	0.455062571
6/5/2015	Jun	2015	Sentinel	mavimba	16	0	27	0	0	0	27	0	0	36	0	0	0	36	0.455062571
6/9/2015	Jun	2015	Random	kivukoni	3	0	0	0	0	0	0	0	0	0	0	0	0	0	0.455062571
6/9/2015	Jun	2015	Sentinel	kivukoni	3	0	1	0	0	0	1	0	0	4	0	0	0	4	0.455062571
6/9/2015	Jun	2015	Sentinel	kivukoni	3	0	0	0	0	0	0	0	0	0	0	0	0	0	0.455062571
6/9/2015	Jun	2015	Sentinel	kivukoni	3	0	0	0	0	0	0	0	0	0	0	0	0	0	0.455062571
6/9/2015	Jun	2015	Random	kivukoni	3	0	0	0	0	0	0	0	0	0	0	0	0	0	0.455062571
6/9/2015	Jun	2015	Random	kivukoni	3	0	0	0	0	0	0	0	0	0	0	0	0	0	0.455062571
6/10/2015	Jun	2015	Sentinel	minepa	12	2	72	2	0	0	74	0	0	31	0	0	2	33	0.455062571
6/10/2015	Jun	2015	Sentinel	minepa	12	0	49	0	0	0	49	0	0	44	0	0	0	44	0.455062571
6/10/2015	Jun	2015	Sentinel	minepa	12	0	0	0	0	0	0	0	0	1	0	0	0	1	0.455062571
6/10/2015	Jun	2015	Random	minepa	12	0	177	1	0	0	178	0	0	36	1	0	0	37	0.455062571
6/10/2015	Jun	2015	Random	minepa	12	0	78	1	0	0	79	0	0	6	0	0	0	6	0.455062571
6/10/2015	Jun	2015	Random	minepa	12	1	6	0	0	0	6	0	0	10	0	0	0	10	0.455062571
6/11/2015	Jun	2015	Sentinel	kivukoni	2	0	6	0	0	0	6	0	0	2	0	0	0	2	0.455062571
6/11/2015	Jun	2015	Random	kivukoni	2	0	9	0	0	0	9	0	0	1	0	0	0	1	0.455062571
6/11/2015	Jun	2015	Sentinel	kivukoni	2	0	0	0	0	0	0	0	0	0	0	0	0	0	0.455062571
6/11/2015	Jun	2015	Sentinel	kivukoni	2	0	1	0	0	0	1	0	0	1	0	0	0	1	0.455062571
6/11/2015	Jun	2015	Random	kivukoni	2	0	20	0	0	0	20	0	0	2	0	0	0	2	0.455062571
6/11/2015	Jun	2015	Random	kivukoni	2	0	7	1	0	1	9	0	0	0	0	0	0	0	0.455062571
6/12/2015	Jun	2015	Sentinel	mavimba	14	0	0	0	0	1	1	0	0	0	0	0	0	0	0.455062571
6/12/2015	Jun	2015	Random	mavimba	14	0	10	0	0	0	10	0	0	10	0	0	1	11	0.455062571
6/12/2015	Jun	2015	Sentinel	mavimba	14	0	7	0	0	0	7	0	0	2	0	0	0	2	0.455062571
6/12/2015	Jun	2015	Random	mavimba	14	0	12	0	0	0	12	0	0	7	0	0	0	7	0.455062571
6/12/2015	Jun	2015	Random	mavimba	14	0	1	0	0	0	1	0	0	2	0	0	0	2	0.455062571
6/12/2015	Jun	2015	Sentinel	mavimba	14	0	8	0	0	0	8	0	0	2	0	0	0	2	0.455062571
16/06/2015	Jun	2015	Random	kivukoni	5	0	18	0	0	0	18	0	0	3	0	0	2	5	0.455062571
16/06/2015	Jun	2015	Sentinel	kivukoni	5	0	6	0	0	0	6	0	0	4	0	0	0	4	0.455062571
16/06/2015	Jun	2015	Sentinel	kivukoni	5	0	0	0	0	0	0	0	0	1	0	0	0	1	0.455062571
16/06/2015	Jun	2015	Sentinel	kivukoni	5	0	1	0	0	0	1	0	0	1	0	0	0	1	0.455062571
16/06/2015	Jun	2015	Random	kivukoni	5	0	1	0	0	1	2	0	0	1	0	0	0	1	0.455062571
16/06/2015	Jun	2015	Random	kivukoni	5	0	14	1	0	0	15	0	0	2	0	0	0	2	0.455062571
17/06/2015	Jun	2015	Sentinel	minepa	9	0	25	0	0	0	25	0	0	8	0	0	0	8	0.455062571
17/06/2015	Jun	2015	Sentinel	minepa	9	0	30	0	0	0	30	0	0	10	0	0	0	10	0.455062571
17/06/2015	Jun	2015	Random	minepa	9	0	40	0	0	0	40	0	0	20	0	0	0	20	0.455062571
17/06/2015	Jun	2015	Sentinel	minepa	9	0	39	0	0	0	39	0	0	5	0	0	0	5	0.455062571
17/06/2015	Jun	2015	Random	minepa	9	0	27	0	0	0	27	0	0	0	0	0	0	0	0.455062571
17/06/2015	Jun	2015	Random	minepa	9	0	24	0	0	0	24	0	0	5	0	0	0	5	0.455062571
18/06/2015	Jun	2015	Sentinel	kivukoni	4	0	5	0	0	0	5	0	0	4	0	0	0	4	0.455062571
18/06/2015	Jun	2015	Random	kivukoni	4	0	0	0	0	0	0	0	0	0	0	0	0	0	0.455062571
18/06/2015	Jun	2015	Random	kivukoni	4	0	0	0	0	0	0	0	0	0	0	0	0	0	0.455062571
18/06/2015	Jun	2015	Sentinel	kivukoni	4	0	0	0	0	0	0	0	0	0	0	0	0	0	0.455062571
18/06/2015	Jun	2015	Random	kivukoni	4	0	2	1	0	0	3	0	0	3	0	0	0	3	0.455062571
18/06/2015	Jun	2015	Sentinel	kivukoni	4	0	1	0	0	0	1	0	0	1	0	0	0	1	0.455062571
19/06/2015	Jun	2015	Sentinel	minepa	10	0	8	0	0	0	8	0	0	5	0	0	1	6	0.455062571
19/06/2015	Jun	2015	Sentinel	minepa	10	1	27	4	0	0	31	0	0	5	0	0	0	5	0.455062571
19/06/2015	Jun	2015	Random	minepa	10	1	10	2	0	0	12	0	0	2	0	0	0	2	0.455062571
19/06/2015	Jun	2015	Sentinel	minepa	10	0	23	0	0	0	23	0	0	17	0	0	0	17	0.455062571
19/06/2015	Jun	2015	Random	minepa	10	2	29	0	0	0	29	0	0	10	0	0	0	10	0.455062571
19/06/2015	Jun	2015	Random	minepa	10	0	186	5	0	2	193	0	0	21	1	0	0	22	0.455062571
23/06/2015	Jun	2015	Sentinel	mavimba	15	0	7	0	0	0	7	0	0	0	0	0	0	0	0.455062571
23/06/2015	Jun	2015	Sentinel	mavimba	15	0	1	0	0	0	1	0	0	3	0	0	0	3	0.455062571
23/06/2015	Jun	2015	Random	mavimba	15	0	0	0	0	0	0	0	0	2	0	0	0	2	0.455062571
23/06/2015	Jun	2015	Random	mavimba	15	0	8	0	0	0	8	0	1	9	0	0	0	9	0.455062571
23/06/2015	Jun	2015	Random	mavimba	15	0	0	0	0	0	0	0	0	3	0	0	0	3	0.455062571
23/06/2015	Jun	2015	Sentinel	mavimba	15	0	8	0	0	0	8	0	0	2	0	0	0	2	0.455062571
24/06/2015	Jun	2015	Sentinel	minepa	11	0	5	0	0	0	5	0	1	1	0	0	0	1	0.455062571
24/06/2015	Jun	2015	Sentinel	minepa	11	0	18	0	0	0	18	0	0	6	0	0	0	6	0.455062571
24/06/2015	Jun	2015	Random	minepa	11	0	14	0	0	0	14	0	0	4	0	0	0	4	0.455062571
24/06/2015	Jun	2015	Random	minepa	11	0	77	2	0	5	84	0	0	7	0	0	0	7	0.455062571
24/06/2015	Jun	2015	Sentinel	minepa	11	0	3	0	0	0	3	0	0	4	0	0	0	4	0.455062571
24/06/2015	Jun	2015	Random	minepa	11	0	16	0	0	0	16	0	0	6	0	0	0	6	0.455062571
25/06/2015	Jun	2015	Sentinel	mavimba	13	0	1	0	0	0	1	0	0	0	0	0	0	0	0.455062571
25/06/2015	Jun	2015	Random	mavimba	13	1	9	0	0	0	9	0	1	4	0	0	0	4	0.455062571
25/06/2015	Jun	2015	Sentinel	mavimba	13	0	1	0	0	0	1	0	0	2	0	0	0	2	0.455062571
25/06/2015	Jun	2015	Random	mavimba	13	0	20	0	0	0	20	0	0	6	0	0	0	6	0.455062571
25/06/2015	Jun	2015	Sentinel	mavimba	13	0	1	0	0	0	1	0	0	0	0	0	0	0	0.455062571
25/06/2015	Jun	2015	Random	mavimba	13	0	0	0	0	0	0	0	0	0	0	0	0	0	0.455062571
26/06/2015	Jun	2015	Sentinel	kivukoni	7	0	100	4	0	0	104	0	0	16	0	0	0	16	0.455062571
26/06/2015	Jun	2015	Random	kivukoni	7	0	10	0	0	0	10	0	0	2	0	0	0	2	0.455062571
26/06/2015	Jun	2015	Sentinel	kivukoni	7	0	0	0	0	0	0	0	0	1	0	0	0	1	0.455062571
26/06/2015	Jun	2015	Random	kivukoni	7	0	54	0	0	0	54	0	0	8	0	0	0	8	0.455062571
26/06/2015	Jun	2015	Sentinel	kivukoni	7	0	8	0	0	0	8	0	0	4	0	0	0	4	0.455062571
26/06/2015	Jun	2015	Random	kivukoni	7	0	0	0	0	0	0	0	0	0	0	0	0	0	0.455062571
7/7/2015	Jul	2015	Sentinel	minepa	11	3	128	2	0	0	130	0	0	11	0	0	0	11	0.408997955
7/7/2015	Jul	2015	Random	minepa	11	0	16	0	0	0	16	0	0	10	0	0	0	10	0.408997955
7/7/2015	Jul	2015	Sentinel	minepa	11	1	17	0	0	0	17	0	0	3	0	0	0	3	0.408997955
7/7/2015	Jul	2015	Random	minepa	11	0	33	2	0	0	35	0	0	21	2	0	0	23	0.408997955
7/7/2015	Jul	2015	Random	minepa	11	5	43	0	0	0	43	0	0	5	0	0	0	5	0.408997955
7/7/2015	Jul	2015	Sentinel	minepa	11	0	34	0	0	0	34	0	0	2	0	0	0	2	0.408997955
7/8/2015	Jul	2015	Sentinel	mavimba	16	0	1	0	0	0	1	0	0	1	0	0	0	1	0.408997955
7/8/2015	Jul	2015	Sentinel	mavimba	16	0	13	0	0	0	13	0	0	24	0	0	0	24	0.408997955
7/8/2015	Jul	2015	Sentinel	mavimba	16	0	1	0	0	0	1	0	0	3	0	0	0	3	0.408997955
7/8/2015	Jul	2015	Random	mavimba	16	0	0	0	0	0	0	0	1	0	0	0	0	0	0.408997955
7/8/2015	Jul	2015	Random	mavimba	16	0	0	0	0	0	0	0	0	0	0	0	0	0	0.408997955
7/8/2015	Jul	2015	Random	mavimba	16	0	5	0	0	0	5	0	0	1	0	0	0	1	0.408997955
7/9/2015	Jul	2015	Sentinel	kivukoni	1	0	0	0	0	0	0	0	0	1	0	0	0	1	0.408997955
7/9/2015	Jul	2015	Random	kivukoni	1	0	1	0	0	0	1	0	0	5	0	0	0	5	0.408997955
7/9/2015	Jul	2015	Sentinel	kivukoni	1	0	4	0	0	0	4	0	0	7	0	0	0	7	0.408997955
7/9/2015	Jul	2015	Random	kivukoni	1	0	0	0	0	0	0	0	0	0	0	0	0	0	0.408997955
7/9/2015	Jul	2015	Random	kivukoni	1	0	0	0	0	0	0	0	0	3	0	0	0	3	0.408997955
7/9/2015	Jul	2015	Sentinel	kivukoni	1	0	0	0	0	0	0	0	0	0	0	0	0	0	0.408997955
7/10/2015	Jul	2015	Random	mavimba	14	0	0	0	0	0	0	0	0	0	0	0	0	0	0.408997955
7/10/2015	Jul	2015	Sentinel	mavimba	14	0	3	1	0	0	4	0	0	0	0	0	0	0	0.408997955
7/10/2015	Jul	2015	Sentinel	mavimba	14	0	1	0	0	0	1	0	0	1	0	0	0	1	0.408997955
7/10/2015	Jul	2015	Random	mavimba	14	0	0	0	0	0	0	0	0	0	0	0	0	0	0.408997955
7/10/2015	Jul	2015	Random	mavimba	14	0	1	0	0	0	1	0	0	0	0	0	0	0	0.408997955
7/10/2015	Jul	2015	Sentinel	mavimba	14	0	0	0	0	0	0	0	0	0	0	0	0	0	0.408997955
14/07/2015	Jul	2015	Sentinel	kivukoni	3	0	0	0	0	0	0	0	0	0	0	0	0	0	0.408997955
14/07/2015	Jul	2015	Random	kivukoni	3	0	1	0	0	0	1	0	0	0	0	0	0	0	0.408997955
14/07/2015	Jul	2015	Sentinel	kivukoni	3	0	0	0	0	0	0	0	0	0	0	0	0	0	0.408997955
14/07/2015	Jul	2015	Sentinel	kivukoni	3	0	4	0	0	0	4	0	0	0	0	0	0	0	0.408997955
14/07/2015	Jul	2015	Random	kivukoni	3	0	0	0	0	0	0	0	0	0	0	0	0	0	0.408997955
14/07/2015	Jul	2015	Random	kivukoni	3	0	0	0	0	0	0	0	0	0	0	0	0	0	0.408997955
15/07/2015	Jul	2015	Sentinel	kivukoni	5	0	0	0	0	0	0	0	0	2	0	0	0	2	0.408997955
15/07/2015	Jul	2015	Sentinel	kivukoni	5	0	5	0	0	0	5	0	0	1	0	0	0	1	0.408997955
15/07/2015	Jul	2015	Random	kivukoni	5	0	5	0	0	0	5	0	0	3	0	0	0	3	0.408997955
15/07/2015	Jul	2015	Sentinel	kivukoni	5	0	0	0	0	0	0	0	0	0	0	0	0	0	0.408997955
15/07/2015	Jul	2015	Random	kivukoni	5	0	0	0	0	0	0	0	0	0	0	0	0	0	0.408997955
15/07/2015	Jul	2015	Sentinel	kivukoni	5	0	0	0	0	0	0	0	1	6	0	0	0	6	0.408997955
16/07/2015	Jul	2015	Sentinel	kivukoni	4	0	0	0	0	0	0	0	0	0	2	0	0	2	0.408997955
16/07/2015	Jul	2015	Random	kivukoni	4	0	12	0	0	0	12	0	0	3	0	0	0	3	0.408997955
16/07/2015	Jul	2015	Sentinel	kivukoni	4	0	2	0	0	0	2	0	0	0	0	0	0	0	0.408997955
16/07/2015	Jul	2015	Random	kivukoni	4	0	5	0	0	0	5	0	0	0	0	0	0	0	0.408997955
16/07/2015	Jul	2015	Sentinel	kivukoni	4	0	0	0	0	0	0	0	0	0	0	0	0	0	0.408997955
16/07/2015	Jul	2015	Random	kivukoni	4	0	4	0	0	0	4	0	0	1	0	0	0	1	0.408997955
17/07/2015	Jul	2015	Random	kivukoni	6	0	2	0	0	0	2	0	0	0	0	0	0	0	0.408997955
17/07/2015	Jul	2015	Random	kivukoni	6	1	1	0	0	0	1	0	0	0	0	0	0	0	0.408997955
17/07/2015	Jul	2015	Sentinel	kivukoni	6	0	0	0	0	0	0	0	0	0	0	0	0	0	0.408997955
17/07/2015	Jul	2015	Sentinel	kivukoni	6	0	1	0	0	0	1	0	0	0	0	0	0	0	0.408997955
17/07/2015	Jul	2015	Random	kivukoni	6	0	0	0	0	0	0	0	0	0	0	0	0	0	0.408997955
17/07/2015	Jul	2015	Sentinel	kivukoni	6	0	0	0	0	0	0	0	0	0	0	0	0	0	0.408997955
21/07/2015	Jul	2015	Random	kivukoni	7	0	16	0	0	0	16	0	0	2	0	0	0	2	0.408997955
21/07/2015	Jul	2015	Random	kivukoni	7	0	12	0	0	0	12	0	0	3	0	0	0	3	0.408997955
21/07/2015	Jul	2015	Sentinel	kivukoni	7	0	1	0	0	0	1	0	0	1	0	0	0	1	0.408997955
21/07/2015	Jul	2015	Sentinel	kivukoni	7	0	6	0	0	0	6	0	0	2	0	0	0	2	0.408997955
21/07/2015	Jul	2015	Random	kivukoni	7	0	0	0	0	0	0	0	0	0	0	0	0	0	0.408997955
21/07/2015	Jul	2015	Sentinel	kivukoni	7	0	50	0	0	0	50	0	0	9	0	0	0	9	0.408997955
22/07/2015	Jul	2015	Sentinel	minepa	8	0	6	0	0	0	6	0	0	6	0	0	0	6	0.408997955
22/07/2015	Jul	2015	Sentinel	minepa	8	0	78	2	0	0	80	0	0	26	4	0	0	30	0.408997955
22/07/2015	Jul	2015	Random	minepa	8	0	77	0	0	0	77	0	0	14	0	0	0	14	0.408997955
22/07/2015	Jul	2015	Random	minepa	8	0	12	0	0	0	12	0	0	5	0	0	0	5	0.408997955
22/07/2015	Jul	2015	Random	minepa	8	0	75	0	0	0	75	0	0	19	0	0	0	19	0.408997955
22/07/2015	Jul	2015	Random	minepa	8	0	29	0	0	0	29	0	0	3	0	0	0	3	0.408997955
23/07/2015	Jul	2015	Random	minepa	10	6	19	0	0	0	19	0	0	16	0	0	0	16	0.408997955
23/07/2015	Jul	2015	Random	minepa	10	8	58	0	0	0	58	0	0	6	0	0	0	6	0.408997955
23/07/2015	Jul	2015	Random	minepa	10	0	216	8	3	0	227	0	12	0	0	0	0	0	0.408997955
23/07/2015	Jul	2015	Sentinel	minepa	10	1	14	0	0	0	14	0	2	0	0	0	0	0	0.408997955
23/07/2015	Jul	2015	Sentinel	minepa	10	0	4	0	0	0	4	0	0	0	0	0	0	0	0.408997955
23/07/2015	Jul	2015	Sentinel	minepa	10	1	27	0	0	0	27	0	34	0	0	0	0	0	0.408997955
24/07/2015	Jul	2015	Sentinel	mavimba	15	0	3	0	0	0	3	0	4	0	0	0	0	0	0.408997955
24/07/2015	Jul	2015	Sentinel	mavimba	15	1	1	0	0	0	1	0	0	0	0	0	0	0	0.408997955
24/07/2015	Jul	2015	Random	mavimba	15	0	1	0	0	0	1	0	0	0	0	0	0	0	0.408997955
24/07/2015	Jul	2015	Sentinel	mavimba	15	0	4	0	0	0	4	0	0	3	0	0	0	3	0.408997955
24/07/2015	Jul	2015	Random	mavimba	15	0	3	0	0	0	3	0	0	0	0	0	0	0	0.408997955
24/07/2015	Jul	2015	Random	mavimba	15	0	2	0	0	0	2	0	0	0	0	0	0	0	0.408997955
28/07/2015	Jul	2015	Random	mavimba	13	0	0	0	0	0	0	0	1	0	0	0	0	0	0.408997955
28/07/2015	Jul	2015	Random	mavimba	13	0	0	0	0	0	0	0	0	0	0	0	0	0	0.408997955
28/07/2015	Jul	2015	Sentinel	mavimba	13	0	0	0	0	0	0	0	0	0	0	0	0	0	0.408997955
28/07/2015	Jul	2015	Random	mavimba	13	0	0	0	0	0	0	0	0	0	0	0	0	0	0.408997955
28/07/2015	Jul	2015	Sentinel	mavimba	13	0	1	0	0	0	1	0	0	0	0	0	0	0	0.408997955
28/07/2015	Jul	2015	Sentinel	mavimba	13	0	0	0	0	0	0	0	0	1	0	0	0	1	0.408997955
29/07/2015	Jul	2015	Random	kivukoni	2	0	4	0	0	0	4	0	0	0	0	0	0	0	0.408997955
29/07/2015	Jul	2015	Sentinel	kivukoni	2	0	0	0	0	0	0	0	0	0	0	0	0	0	0.408997955
29/07/2015	Jul	2015	Sentinel	kivukoni	2	0	0	0	0	0	0	0	0	2	0	0	0	2	0.408997955
29/07/2015	Jul	2015	Sentinel	kivukoni	2	0	0	0	0	0	0	0	0	0	0	0	0	0	0.408997955
29/07/2015	Jul	2015	Random	kivukoni	2	0	0	0	0	0	0	0	0	0	0	0	0	0	0.408997955
29/07/2015	Jul	2015	Random	kivukoni	2	0	0	0	0	0	0	0	0	1	0	0	0	1	0.408997955
30/07/2015	Jul	2015	Random	minepa	12	6	12	0	0	0	12	0	0	23	0	0	0	23	0.408997955
30/07/2015	Jul	2015	Random	minepa	12	1	9	0	0	0	9	0	0	16	0	0	0	16	0.408997955
30/07/2015	Jul	2015	Random	minepa	12	0	5	0	0	0	5	0	0	3	0	0	0	3	0.408997955
30/07/2015	Jul	2015	Sentinel	minepa	12	0	4	0	0	1	5	0	0	3	0	0	0	3	0.408997955
30/07/2015	Jul	2015	Sentinel	minepa	12	0	30	4	0	0	34	0	0	34	0	0	0	34	0.408997955
30/07/2015	Jul	2015	Sentinel	minepa	12	11	17	0	0	0	17	0	0	18	0	0	0	18	0.408997955
31/07/2015	Jul	2015	Random	minepa	9	0	10	0	0	0	10	0	0	8	0	0	0	8	0.408997955
31/07/2015	Jul	2015	Random	minepa	9	0	17	0	0	0	17	0	0	4	0	0	0	4	0.408997955
31/07/2015	Jul	2015	Sentinel	minepa	9	0	31	4	1	0	36	0	0	11	4	0	0	15	0.408997955
31/07/2015	Jul	2015	Sentinel	minepa	9	1	10	0	0	0	10	0	0	11	0	0	0	11	0.408997955
31/07/2015	Jul	2015	Random	minepa	9	7	46	0	0	0	46	0	0	112	1	0	0	113	0.408997955
31/07/2015	Jul	2015	Sentinel	minepa	9	0	2	0	0	0	2	0	0	0	0	0	0	0	0.408997955
8/11/2015	Aug	2015	Random	minepa	12	0	8	0	0	0	8	0.067658999	0	3	0	0	0	3	0.539083558
8/11/2015	Aug	2015	Sentinel	minepa	12	0	25	0	0	0	25	0.067658999	0	6	0	0	0	6	0.539083558
8/11/2015	Aug	2015	Sentinel	minepa	12	0	0	0	0	0	0	0.067658999	0	0	0	0	0	0	0.539083558
8/11/2015	Aug	2015	Random	minepa	12	0	20	0	0	0	20	0.067658999	0	4	0	0	0	4	0.539083558
8/11/2015	Aug	2015	Random	minepa	12	0	16	0	0	0	16	0.067658999	0	10	0	0	0	10	0.539083558
8/11/2015	Aug	2015	Sentinel	minepa	12	0	43	0	0	0	43	0.067658999	0	10	0	0	0	10	0.539083558
8/12/2015	Aug	2015	Random	minepa	10	4	33	0	0	3	36	0.067658999	0	5	0	0	1	6	0.539083558
8/12/2015	Aug	2015	Random	minepa	10	2	31	0	0	0	31	0.067658999	0	5	0	0	0	5	0.539083558
8/12/2015	Aug	2015	Sentinel	minepa	10	0	30	0	0	0	30	0.067658999	0	8	0	0	0	8	0.539083558
8/12/2015	Aug	2015	Sentinel	minepa	10	3	40	0	0	0	40	0.067658999	0	39	0	0	0	39	0.539083558
8/12/2015	Aug	2015	Sentinel	minepa	10	0	24	2	0	0	26	0.067658999	0	0	0	0	0	0	0.539083558
8/12/2015	Aug	2015	Random	minepa	10	0	186	7	0	0	193	0.067658999	0	43	0	0	0	43	0.539083558
13/08/2015	Aug	2015	Sentinel	kivukoni	4	0	15	0	0	0	15	0.067658999	0	0	0	0	0	0	0.539083558
13/08/2015	Aug	2015	Random	kivukoni	4	0	5	0	0	0	5	0.067658999	0	1	0	0	0	1	0.539083558
13/08/2015	Aug	2015	Random	kivukoni	4	0	1	0	0	0	1	0.067658999	0	0	0	0	0	0	0.539083558
13/08/2015	Aug	2015	Sentinel	kivukoni	4	0	0	0	0	0	0	0.067658999	0	0	0	0	0	0	0.539083558
13/08/2015	Aug	2015	Sentinel	kivukoni	4	0	0	0	0	0	0	0.067658999	0	0	0	0	0	0	0.539083558
13/08/2015	Aug	2015	Random	kivukoni	4	0	3	0	0	0	3	0.067658999	0	0	0	0	0	0	0.539083558
14/08/2015	Aug	2015	Sentinel	mavimba	15	0	1	0	0	0	1	0.067658999	0	0	0	0	0	0	0.539083558
14/08/2015	Aug	2015	Sentinel	mavimba	15	0	2	0	0	0	2	0.067658999	0	2	0	0	0	2	0.539083558
14/08/2015	Aug	2015	Random	mavimba	15	0	0	0	0	0	0	0.067658999	0	0	0	0	0	0	0.539083558
14/08/2015	Aug	2015	Random	mavimba	15	0	2	0	0	0	2	0.067658999	0	3	0	0	0	3	0.539083558
14/08/2015	Aug	2015	Sentinel	mavimba	15	0	14	0	0	0	14	0.067658999	0	1	0	0	0	1	0.539083558
14/08/2015	Aug	2015	Random	mavimba	15	0	24	0	0	0	24	0.067658999	0	6	0	0	0	6	0.539083558
18/08/2015	Aug	2015	Sentinel	minepa	8	0	3	0	0	0	3	0.067658999	0	5	0	0	0	5	0.539083558
18/08/2015	Aug	2015	Random	minepa	8	1	118	0	0	0	118	0.067658999	0	18	0	0	0	18	0.539083558
18/08/2015	Aug	2015	Random	minepa	8	1	6	1	0	1	8	0.067658999	0	6	0	0	0	6	0.539083558
18/08/2015	Aug	2015	Random	minepa	8	0	52	0	0	0	52	0.067658999	0	0	0	0	0	0	0.539083558
18/08/2015	Aug	2015	Sentinel	minepa	8	0	13	0	0	0	13	0.067658999	0	10	0	0	0	10	0.539083558
18/08/2015	Aug	2015	Sentinel	minepa	8	20	69	3	0	0	72	0.067658999	0	56	0	0	0	56	0.539083558
19/08/2015	Aug	2015	Random	kivukoni	5	0	0	0	0	0	0	0.067658999	0	0	0	0	0	0	0.539083558
19/08/2015	Aug	2015	Random	kivukoni	5	0	0	0	0	0	0	0.067658999	0	0	0	0	0	0	0.539083558
19/08/2015	Aug	2015	Random	kivukoni	5	0	7	2	0	0	9	0.067658999	1	1	0	0	0	1	0.539083558
19/08/2015	Aug	2015	Sentinel	kivukoni	5	0	5	0	0	0	5	0.067658999	0	0	0	0	0	0	0.539083558
19/08/2015	Aug	2015	Sentinel	kivukoni	5	0	1	0	0	0	1	0.067658999	0	0	0	0	0	0	0.539083558
19/08/2015	Aug	2015	Sentinel	kivukoni	5	0	0	0	0	0	0	0.067658999	0	0	0	0	0	0	0.539083558
20/08/2015	Aug	2015	Random	mavimba	14	0	6	0	0	0	6	0.067658999	0	3	0	0	0	3	0.539083558
20/08/2015	Aug	2015	Sentinel	mavimba	14	0	1	0	0	0	1	0.067658999	1	1	0	0	0	1	0.539083558
20/08/2015	Aug	2015	Sentinel	mavimba	14	0	14	0	0	0	14	0.067658999	0	1	0	0	0	1	0.539083558
20/08/2015	Aug	2015	Random	mavimba	14	0	0	0	0	0	0	0.067658999	0	0	0	0	0	0	0.539083558
20/08/2015	Aug	2015	Random	mavimba	14	0	5	0	0	0	5	0.067658999	0	3	0	0	0	3	0.539083558
20/08/2015	Aug	2015	Sentinel	mavimba	14	0	2	0	0	0	2	0.067658999	0	0	0	0	0	0	0.539083558
21/08/2015	Aug	2015	Sentinel	kivukoni	3	0	1	0	0	0	1	0.067658999	0	1	0	0	0	1	0.539083558
21/08/2015	Aug	2015	Random	kivukoni	3	0	0	0	0	0	0	0.067658999	0	0	0	0	0	0	0.539083558
21/08/2015	Aug	2015	Random	kivukoni	3	0	1	0	0	0	1	0.067658999	0	1	0	0	0	1	0.539083558
21/08/2015	Aug	2015	Sentinel	kivukoni	3	0	0	0	0	0	0	0.067658999	0	0	0	0	0	0	0.539083558
21/08/2015	Aug	2015	Random	kivukoni	3	0	0	0	0	0	0	0.067658999	0	0	0	0	0	0	0.539083558
21/08/2015	Aug	2015	Sentinel	kivukoni	3	0	0	0	0	0	0	0.067658999	0	1	0	0	0	1	0.539083558
25/08/2015	Aug	2015	Sentinel	minepa	11	2	30	1	0	0	31	0.067658999	0	7	0	0	0	7	0.539083558
25/08/2015	Aug	2015	Random	minepa	11	16	21	0	0	0	21	0.067658999	0	9	0	0	0	9	0.539083558
25/08/2015	Aug	2015	Sentinel	minepa	11	0	8	0	0	0	8	0.067658999	0	0	0	0	0	0	0.539083558
25/08/2015	Aug	2015	Random	minepa	11	1	36	0	0	16	52	0.067658999	0	2	0	0	0	2	0.539083558
25/08/2015	Aug	2015	Random	minepa	11	2	0	0	0	0	0	0.067658999	0	3	0	0	0	3	0.539083558
25/08/2015	Aug	2015	Sentinel	minepa	11	0	19	0	0	19	38	0.067658999	8	0	0	0	0	0	0.539083558
26/08/2015	Aug	2015	Sentinel	kivukoni	1	0	1	0	0	0	1	0.067658999	0	0	0	0	0	0	0.539083558
26/08/2015	Aug	2015	Sentinel	kivukoni	1	0	0	0	0	0	0	0.067658999	0	0	0	0	0	0	0.539083558
26/08/2015	Aug	2015	Sentinel	kivukoni	1	0	0	1	0	0	1	0.067658999	0	0	0	0	0	0	0.539083558
26/08/2015	Aug	2015	Random	kivukoni	1	1	0	0	0	0	0	0.067658999	0	0	0	0	0	0	0.539083558
26/08/2015	Aug	2015	Random	kivukoni	1	0	5	0	0	0	5	0.067658999	0	0	0	0	0	0	0.539083558
26/08/2015	Aug	2015	Random	kivukoni	1	0	2	6	0	0	8	0.067658999	0	0	0	0	0	0	0.539083558
27/08/2015	Aug	2015	Sentinel	kivukoni	6	0	2	0	0	0	2	0.067658999	0	0	0	0	0	0	0.539083558
27/08/2015	Aug	2015	Random	kivukoni	6	0	3	0	0	0	3	0.067658999	0	3	0	0	0	3	0.539083558
27/08/2015	Aug	2015	Random	kivukoni	6	0	9	0	0	0	9	0.067658999	0	2	0	0	0	2	0.539083558
27/08/2015	Aug	2015	Sentinel	kivukoni	6	0	2	0	0	0	2	0.067658999	0	0	0	0	0	0	0.539083558
27/08/2015	Aug	2015	Sentinel	kivukoni	6	0	11	0	0	0	11	0.067658999	0	0	0	0	0	0	0.539083558
27/08/2015	Aug	2015	Random	kivukoni	6	0	3	0	0	0	3	0.067658999	0	1	0	0	0	1	0.539083558
28/08/2015	Aug	2015	Sentinel	minepa	9	0	30	0	0	0	30	0.067658999	0	5	0	0	0	5	0.539083558
28/08/2015	Aug	2015	Random	minepa	9	0	19	0	0	0	19	0.067658999	0	6	0	0	0	6	0.539083558
28/08/2015	Aug	2015	Sentinel	minepa	9	0	21	13	1	0	35	0.067658999	0	3	0	0	0	3	0.539083558
28/08/2015	Aug	2015	Sentinel	minepa	9	0	16	0	0	0	16	0.067658999	0	2	0	0	0	2	0.539083558
28/08/2015	Aug	2015	Random	minepa	9	0	12	0	0	0	12	0.067658999	0	10	0	0	0	10	0.539083558
28/08/2015	Aug	2015	Random	minepa	9	0	47	0	0	0	47	0.067658999	0	3	0	0	0	3	0.539083558
9/1/2015	Aug	2015	Random	mavimba	16	0	29	0	0	0	29	0.067658999	0	6	0	0	0	6	0.539083558
9/1/2015	Aug	2015	Random	mavimba	16	0	1	0	0	0	1	0.067658999	0	0	0	0	0	0	0.539083558
9/1/2015	Aug	2015	Sentinel	mavimba	16	0	2	0	0	0	2	0.067658999	0	0	0	0	0	0	0.539083558
9/1/2015	Aug	2015	Sentinel	mavimba	16	0	1	0	0	0	1	0.067658999	0	0	0	0	0	0	0.539083558
9/1/2015	Aug	2015	Sentinel	mavimba	16	8	17	3	0	0	20	0.067658999	0	5	2	0	0	7	0.539083558
9/1/2015	Aug	2015	Random	mavimba	16	0	13	3	0	0	16	0.067658999	0	2	0	0	0	2	0.539083558
9/2/2015	Aug	2015	Sentinel	kivukoni	2	0	0	0	0	0	0	0.067658999	0	0	0	0	0	0	0.539083558
9/2/2015	Aug	2015	Sentinel	kivukoni	2	0	0	0	0	0	0	0.067658999	0	0	0	0	0	0	0.539083558
9/2/2015	Aug	2015	Random	kivukoni	2	0	6	1	0	0	7	0.067658999	0	2	0	0	0	2	0.539083558
9/2/2015	Aug	2015	Random	kivukoni	2	0	17	0	0	0	17	0.067658999	0	2	0	0	0	2	0.539083558
9/2/2015	Aug	2015	Sentinel	kivukoni	2	1	3	0	0	0	3	0.067658999	0	6	0	0	0	6	0.539083558
9/2/2015	Aug	2015	Random	kivukoni	2	0	2	1	0	0	3	0.067658999	0	1	0	0	0	1	0.539083558
9/3/2015	Aug	2015	Sentinel	mavimba	13	0	1	0	0	0	1	0.067658999	0	7	0	0	0	7	0.539083558
9/3/2015	Aug	2015	Random	mavimba	13	0	3	0	0	0	3	0.067658999	0	0	0	0	0	0	0.539083558
9/3/2015	Aug	2015	Random	mavimba	13	0	20	0	0	0	20	0.067658999	0	0	0	0	0	0	0.539083558
9/3/2015	Aug	2015	Sentinel	mavimba	13	0	9	0	0	0	9	0.067658999	0	0	0	0	0	0	0.539083558
9/3/2015	Aug	2015	Sentinel	mavimba	13	0	2	0	0	0	2	0.067658999	0	1	0	0	0	1	0.539083558
9/3/2015	Aug	2015	Random	mavimba	13	0	1	0	0	0	1	0.067658999	0	12	0	0	0	12	0.539083558
9/4/2015	Aug	2015	Sentinel	kivukoni	7	0	17	0	0	0	17	0.067658999	0	2	0	0	0	2	0.539083558
9/4/2015	Aug	2015	Sentinel	kivukoni	7	0	1	0	0	0	1	0.067658999	0	0	0	0	0	0	0.539083558
9/4/2015	Aug	2015	Sentinel	kivukoni	7	0	60	1	0	0	61	0.067658999	0	6	0	0	0	6	0.539083558
9/4/2015	Aug	2015	Random	kivukoni	7	0	64	4	0	0	68	0.067658999	0	2	0	0	0	2	0.539083558
9/4/2015	Aug	2015	Random	kivukoni	7	0	30	4	0	0	34	0.067658999	0	5	0	0	0	5	0.539083558
9/4/2015	Aug	2015	Random	kivukoni	7	0	0	0	0	0	0	0.067658999	0	0	0	0	0	0	0.539083558
9/8/2015	Sept	2015	Sentinel	minepa	11	0	54	0	0	0	54	0	0	3	0	0	0	3	0
9/8/2015	Sept	2015	Sentinel	minepa	11	3	144	3	0	0	147	0	0	4	0	0	0	4	0
9/8/2015	Sept	2015	Random	minepa	11	0	15	3	0	1	19	0	0	2	0	0	0	2	0
9/8/2015	Sept	2015	Random	minepa	11	0	20	0	0	0	20	0	0	7	0	0	0	7	0
9/8/2015	Sept	2015	Random	minepa	11	10	65	0	0	0	65	0	2	12	0	0	0	12	0
9/8/2015	Sept	2015	Sentinel	minepa	11	0	0	0	0	0	0	0	0	0	0	0	0	0	0
9/9/2015	Sept	2015	Random	kivukoni	4	0	0	0	0	0	0	0	0	0	0	0	0	0	0
9/9/2015	Sept	2015	Random	kivukoni	4	0	0	0	0	0	0	0	0	1	0	0	0	1	0
9/9/2015	Sept	2015	Sentinel	kivukoni	4	0	1	0	0	0	1	0	0	0	0	0	0	0	0
9/9/2015	Sept	2015	Random	kivukoni	4	0	0	0	0	0	0	0	0	0	0	0	0	0	0
9/9/2015	Sept	2015	Sentinel	kivukoni	4	0	3	0	0	0	3	0	0	0	0	0	0	0	0
9/9/2015	Sept	2015	Sentinel	kivukoni	4	0	0	0	0	0	0	0	0	0	0	0	0	0	0
9/10/2015	Sept	2015	Sentinel	kivukoni	5	0	1	0	0	0	1	0	0	0	0	0	0	0	0
9/10/2015	Sept	2015	Random	kivukoni	5	0	4	0	0	0	4	0	0	0	0	0	0	0	0
9/10/2015	Sept	2015	Sentinel	kivukoni	5	0	1	0	0	0	1	0	0	0	0	0	0	0	0
9/10/2015	Sept	2015	Sentinel	kivukoni	5	0	7	0	0	0	7	0	0	1	0	0	0	1	0
9/10/2015	Sept	2015	Random	kivukoni	5	0	2	0	0	0	2	0	0	0	0	0	0	0	0
9/10/2015	Sept	2015	Random	kivukoni	5	0	1	0	0	0	1	0	0	0	0	0	0	0	0
9/11/2015	Sept	2015	Sentinel	mavimba	15	0	1	0	0	0	1	0	0	1	0	0	0	1	0
9/11/2015	Sept	2015	Sentinel	mavimba	15	0	0	0	0	0	0	0	0	0	0	0	0	0	0
9/11/2015	Sept	2015	Sentinel	mavimba	15	0	3	0	0	0	3	0	0	2	0	0	0	2	0
9/11/2015	Sept	2015	Random	mavimba	15	0	0	0	0	0	0	0	0	0	0	0	0	0	0
9/11/2015	Sept	2015	Random	mavimba	15	0	22	1	0	0	23	0	0	2	0	0	0	2	0
9/11/2015	Sept	2015	Random	mavimba	15	0	14	0	0	0	14	0	0	0	0	0	0	0	0
15/09/2015	Sept	2015	Random	kivukoni	6	0	1	0	0	0	1	0	0	0	0	0	0	0	0
15/09/2015	Sept	2015	Sentinel	kivukoni	6	0	0	0	0	0	0	0	0	0	0	0	0	0	0
15/09/2015	Sept	2015	Sentinel	kivukoni	6	0	0	0	0	0	0	0	0	0	0	0	0	0	0
15/09/2015	Sept	2015	Sentinel	kivukoni	6	0	2	0	0	0	2	0	0	0	0	0	0	0	0
15/09/2015	Sept	2015	Random	kivukoni	6	0	6	0	0	0	6	0	0	0	0	0	0	0	0
15/09/2015	Sept	2015	Random	kivukoni	6	0	0	0	0	0	0	0	0	0	0	0	0	0	0
16/09/2015	Sept	2015	Random	kivukoni	2	0	0	0	0	0	0	0	0	0	0	0	0	0	0
16/09/2015	Sept	2015	Sentinel	kivukoni	2	0	0	0	0	0	0	0	0	0	0	0	0	0	0
16/09/2015	Sept	2015	Random	kivukoni	2	0	2	0	0	0	2	0	0	0	0	0	0	0	0
16/09/2015	Sept	2015	Sentinel	kivukoni	2	0	2	0	0	0	2	0	0	1	0	0	0	1	0
16/09/2015	Sept	2015	Sentinel	kivukoni	2	0	0	0	0	0	0	0	0	0	0	0	0	0	0
16/09/2015	Sept	2015	Random	kivukoni	2	0	0	0	0	0	0	0	0	2	0	0	0	2	0
18/09/2015	Sept	2015	Sentinel	mavimba	13	0	1	0	0	0	1	0	0	1	0	0	0	1	0
18/09/2015	Sept	2015	Random	mavimba	13	0	16	0	0	0	16	0	0	2	0	0	0	2	0
18/09/2015	Sept	2015	Random	mavimba	13	0	11	0	0	0	11	0	0	0	0	0	0	0	0
18/09/2015	Sept	2015	Sentinel	mavimba	13	0	3	0	0	0	3	0	0	0	0	0	0	0	0
18/09/2015	Sept	2015	Random	mavimba	13	0	5	0	0	0	5	0	0	0	0	0	0	0	0
18/09/2015	Sept	2015	Sentinel	mavimba	13	0	1	0	0	0	1	0	0	0	0	0	0	0	0
20/09/2015	Sept	2015	Sentinel	kivukoni	3	0	0	0	0	0	0	0	0	0	0	0	0	0	0
20/09/2015	Sept	2015	Sentinel	kivukoni	3	0	0	0	0	0	0	0	0	0	0	0	0	0	0
20/09/2015	Sept	2015	Random	kivukoni	3	0	0	0	0	0	0	0	0	0	0	0	0	0	0
20/09/2015	Sept	2015	Sentinel	kivukoni	3	0	1	0	0	0	1	0	0	2	0	0	0	2	0
20/09/2015	Sept	2015	Random	kivukoni	3	0	0	1	0	0	1	0	0	0	0	0	0	0	0
20/09/2015	Sept	2015	Random	kivukoni	3	0	1	0	0	0	1	0	0	0	0	0	0	0	0
22/09/2015	Sept	2015	Random	minepa	12	0	4	0	0	0	4	0	0	2	0	0	0	2	0
22/09/2015	Sept	2015	Sentinel	minepa	12	4	11	0	0	0	11	0	0	9	0	0	0	9	0
22/09/2015	Sept	2015	Random	minepa	12	0	5	3	0	0	8	0	0	1	0	0	0	1	0
22/09/2015	Sept	2015	Random	minepa	12	0	5	0	0	0	5	0	0	0	0	0	0	0	0
22/09/2015	Sept	2015	Sentinel	minepa	12	2	38	0	0	0	38	0	0	3	0	0	0	3	0
22/09/2015	Sept	2015	Sentinel	minepa	12	0	3	0	0	0	3	0	0	15	0	0	0	15	0
23/09/2015	Sept	2015	Sentinel	mavimba	14	1	4	0	0	0	4	0	0	0	0	0	0	0	0
23/09/2015	Sept	2015	Random	mavimba	14	0	2	0	0	0	2	0	0	0	0	0	0	0	0
23/09/2015	Sept	2015	Sentinel	mavimba	14	0	2	1	0	0	3	0	0	0	0	0	0	0	0
23/09/2015	Sept	2015	Random	mavimba	14	0	11	0	0	0	11	0	0	0	0	0	0	0	0
23/09/2015	Sept	2015	Random	mavimba	14	0	8	0	0	1	9	0	0	2	0	0	0	2	0
23/09/2015	Sept	2015	Sentinel	mavimba	14	0	1	0	0	0	1	0	0	0	0	0	0	0	0
24/09/2015	Sept	2015	Sentinel	minepa	8	0	28	3	0	0	31	0	0	2	0	0	0	2	0
24/09/2015	Sept	2015	Sentinel	minepa	8	1	30	0	0	0	30	0	0	1	0	0	0	1	0
24/09/2015	Sept	2015	Sentinel	minepa	8	0	2	2	0	0	4	0	0	0	0	0	0	0	0
24/09/2015	Sept	2015	Random	minepa	8	0	2	0	0	0	2	0	0	0	0	0	0	0	0
24/09/2015	Sept	2015	Random	minepa	8	0	20	0	0	0	20	0	0	2	0	0	0	2	0
24/09/2015	Sept	2015	Sentinel	minepa	8	0	0	0	0	0	0	0	0	0	0	0	0	0	0
25/09/2015	Sept	2015	Sentinel	mavimba	16	0	0	0	0	0	0	0	0	0	0	0	0	0	0
25/09/2015	Sept	2015	Sentinel	mavimba	16	0	4	3	0	0	7	0	0	0	0	0	0	0	0
25/09/2015	Sept	2015	Random	mavimba	16	0	2	0	0	0	2	0	0	3	0	0	0	3	0
25/09/2015	Sept	2015	Sentinel	mavimba	16	1	8	5	0	0	13	0	0	2	0	0	0	2	0
25/09/2015	Sept	2015	Random	mavimba	16	0	2	0	0	0	2	0	0	0	0	0	0	0	0
25/09/2015	Sept	2015	Sentinel	mavimba	16	0	0	0	0	0	0	0	0	0	0	0	0	0	0
29/09/2015	Sept	2015	Random	minepa	10	4	15	1	0	0	16	0	0	0	0	0	0	0	0
29/09/2015	Sept	2015	Sentinel	minepa	10	2	5	0	1	0	6	0	0	2	0	0	0	2	0
29/09/2015	Sept	2015	Random	minepa	10	0	45	7	0	0	52	0	0	0	0	0	0	0	0
29/09/2015	Sept	2015	Sentinel	minepa	10	8	1	0	0	0	1	0	0	0	0	0	0	0	0
29/09/2015	Sept	2015	Random	minepa	10	0	134	14	0	0	148	0	0	20	0	0	0	20	0
29/09/2015	Sept	2015	Sentinel	minepa	10	0	0	0	0	0	0	0	0	0	0	0	0	0	0
30/09/2015	Sept	2015	Sentinel	kivukoni	1	0	0	0	0	0	0	0	0	0	0	0	0	0	0
30/09/2015	Sept	2015	Sentinel	kivukoni	1	0	3	0	0	0	3	0	0	0	1	0	0	1	0
30/09/2015	Sept	2015	Random	kivukoni	1	0	0	0	0	0	0	0	0	0	0	0	0	0	0
30/09/2015	Sept	2015	Random	kivukoni	1	0	2	0	0	0	2	0	2	1	0	0	0	1	0
30/09/2015	Sept	2015	Random	kivukoni	1	0	3	0	0	0	3	0	0	0	0	0	0	0	0
30/09/2015	Sept	2015	Sentinel	kivukoni	1	0	1	0	0	0	1	0	0	0	0	0	0	0	0
10/1/2015	Oct	2015	Random	minepa	9	0	3	0	0	0	3	0	0	0	0	0	0	0	0
10/1/2015	Oct	2015	Sentinel	minepa	9	1	15	0	0	0	15	0	0	0	0	0	0	0	0
10/1/2015	Oct	2015	Sentinel	minepa	9	0	2	12	0	0	14	0	0	0	3	0	0	3	0
10/1/2015	Oct	2015	Random	minepa	9	0	14	1	0	1	16	0	0	2	0	0	0	2	0
10/1/2015	Oct	2015	Random	minepa	9	0	4	1	0	0	5	0	0	1	0	0	0	1	0
10/1/2015	Oct	2015	Sentinel	minepa	9	0	0	0	0	0	0	0	0	0	0	0	0	0	0
10/2/2015	Oct	2015	Sentinel	kivukoni	7	0	1	1	0	0	2	0	0	1	0	0	0	1	0
10/2/2015	Oct	2015	Random	kivukoni	7	0	8	0	0	0	8	0	0	5	0	0	0	5	0
10/2/2015	Oct	2015	Sentinel	kivukoni	7	0	0	0	0	0	0	0	0	0	0	0	0	0	0
10/2/2015	Oct	2015	Sentinel	kivukoni	7	0	1	2	0	0	3	0	0	0	1	0	0	1	0
10/2/2015	Oct	2015	Sentinel	kivukoni	7	0	0	0	0	0	0	0	0	0	0	0	0	0	0
10/2/2015	Oct	2015	Random	kivukoni	7	0	6	0	0	0	6	0	0	5	0	0	0	5	0
10/6/2015	Oct	2015	Random	kivukoni	4	0	1	0	0	0	1	0	0	0	0	0	0	0	0
10/6/2015	Oct	2015	Random	kivukoni	4	0	2	0	0	0	2	0	0	0	0	0	0	0	0
10/6/2015	Oct	2015	Sentinel	kivukoni	4	0	0	0	0	0	0	0	0	0	0	0	0	0	0
10/6/2015	Oct	2015	Sentinel	kivukoni	4	0	0	0	0	0	0	0	0	0	0	0	0	0	0
10/6/2015	Oct	2015	Random	kivukoni	4	0	0	0	0	0	0	0	0	0	0	0	0	0	0
10/6/2015	Oct	2015	Sentinel	kivukoni	4	0	0	0	0	0	0	0	0	0	0	0	0	0	0
10/7/2015	Oct	2015	Sentinel	minepa	10	0	1	0	0	0	1	0	0	0	0	0	0	0	0
10/7/2015	Oct	2015	Random	minepa	10	0	20	0	1	0	21	0	0	0	0	0	0	0	0
10/7/2015	Oct	2015	Sentinel	minepa	10	0	13	0	0	0	13	0	0	1	0	0	0	1	0
10/7/2015	Oct	2015	Random	minepa	10	0	0	0	0	0	0	0	0	0	0	0	0	0	0
10/7/2015	Oct	2015	Sentinel	minepa	10	0	1	0	0	0	1	0	0	0	0	0	0	0	0
10/7/2015	Oct	2015	Random	minepa	10	33	14	0	7	4	25	0	2	2	2	0	0	4	0
10/8/2015	Oct	2015	Random	minepa	8	0	4	0	0	0	4	0	0	0	0	0	0	0	0
10/8/2015	Oct	2015	Sentinel	minepa	8	0	3	0	1	0	4	0	0	0	0	0	0	0	0
10/8/2015	Oct	2015	Sentinel	minepa	8	0	0	0	0	0	0	0	0	0	0	0	0	0	0
10/8/2015	Oct	2015	Sentinel	minepa	8	0	0	0	0	0	0	0	0	0	0	0	0	0	0
10/8/2015	Oct	2015	Random	minepa	8	0	9	0	1	0	10	0	0	0	0	0	1	1	0
10/8/2015	Oct	2015	Random	minepa	8	0	4	0	0	0	4	0	0	0	0	0	0	0	0
10/9/2015	Oct	2015	Random	mavimba	13	0	0	0	0	0	0	0	0	0	0	0	0	0	0
10/9/2015	Oct	2015	Random	mavimba	13	0	1	0	0	0	1	0	0	0	0	0	0	0	0
10/9/2015	Oct	2015	Sentinel	mavimba	13	0	0	0	0	0	0	0	0	0	0	0	0	0	0
10/9/2015	Oct	2015	Random	mavimba	13	0	0	0	0	0	0	0	0	0	0	0	0	0	0
10/9/2015	Oct	2015	Sentinel	mavimba	13	0	1	0	0	0	1	0	0	0	0	0	0	0	0
10/9/2015	Oct	2015	Sentinel	mavimba	13	0	0	0	0	0	0	0	0	0	0	0	0	0	0
13/10/2015	Oct	2015	Sentinel	kivukoni	5	0	0	0	0	0	0	0	0	0	0	0	0	0	0
13/10/2015	Oct	2015	Random	kivukoni	5	0	0	0	0	0	0	0	0	0	0	0	0	0	0
13/10/2015	Oct	2015	Sentinel	kivukoni	5	0	0	0	0	0	0	0	0	0	0	0	0	0	0
13/10/2015	Oct	2015	Random	kivukoni	5	0	0	0	0	0	0	0	0	0	0	0	0	0	0
13/10/2015	Oct	2015	Random	kivukoni	5	0	0	0	0	0	0	0	0	0	0	0	0	0	0
13/10/2015	Oct	2015	Random	kivukoni	5	0	0	0	0	0	0	0	0	0	0	0	0	0	0
14/10/2015	Oct	2015	Sentinel	minepa	11	0	0	0	0	0	0	0	0	0	0	0	0	0	0
14/10/2015	Oct	2015	Sentinel	minepa	11	0	1	0	2	0	3	0	0	0	0	0	0	0	0
14/10/2015	Oct	2015	Sentinel	minepa	11	0	0	0	0	0	0	0	0	0	0	0	0	0	0
14/10/2015	Oct	2015	Random	minepa	11	0	2	0	0	0	2	0	0	1	0	0	0	1	0
14/10/2015	Oct	2015	Random	minepa	11	0	0	0	0	0	0	0	0	0	0	0	0	0	0
14/10/2015	Oct	2015	Random	minepa	11	0	3	0	0	0	3	0	0	0	0	0	0	0	0
15/10/2015	Oct	2015	Sentinel	minepa	12	1	2	0	0	0	2	0	0	5	0	0	0	5	0
15/10/2015	Oct	2015	Sentinel	minepa	12	0	4	0	0	0	4	0	0	1	0	0	0	1	0
15/10/2015	Oct	2015	Random	minepa	12	1	1	0	0	1	2	0	0	0	0	0	0	0	0
15/10/2015	Oct	2015	Random	minepa	12	0	4	0	0	0	4	0	0	0	0	0	0	0	0
15/10/2015	Oct	2015	Random	minepa	12	0	7	0	1	0	8	0	0	3	0	0	0	3	0
15/10/2015	Oct	2015	Sentinel	minepa	12	0	0	0	0	0	0	0	0	0	0	0	0	0	0
16/10/2015	Oct	2015	Random	minepa	9	0	2	0	1	0	3	0	0	3	0	0	0	3	0
16/10/2015	Oct	2015	Random	minepa	9	0	1	0	0	1	2	0	0	0	0	0	0	0	0
16/10/2015	Oct	2015	Sentinel	minepa	9	0	2	3	0	0	5	0	0	1	0	0	0	1	0
16/10/2015	Oct	2015	Sentinel	minepa	9	0	2	0	0	0	2	0	0	0	0	0	0	0	0
16/10/2015	Oct	2015	Random	minepa	9	1	1	0	0	0	1	0	0	0	0	0	0	0	0
16/10/2015	Oct	2015	Sentinel	minepa	9	0	0	0	0	0	0	0	0	0	0	0	0	0	0
20/10/2015	Oct	2015	Sentinel	kivukoni	1	0	0	0	0	0	0	0	0	0	0	0	0	0	0
20/10/2015	Oct	2015	Random	kivukoni	1	0	0	0	0	0	0	0	0	0	0	0	0	0	0
20/10/2015	Oct	2015	Random	kivukoni	1	0	0	0	0	0	0	0	0	0	0	0	0	0	0
20/10/2015	Oct	2015	Sentinel	kivukoni	1	0	0	0	0	0	0	0	0	0	0	0	0	0	0
20/10/2015	Oct	2015	Random	kivukoni	1	0	1	0	0	0	1	0	0	1	1	0	0	2	0
20/10/2015	Oct	2015	Sentinel	kivukoni	1	0	0	1	0	0	1	0	0	0	0	0	0	0	0
21/10/2015	Oct	2015	Random	mavimba	16	0	0	0	0	0	0	0	0	0	0	0	0	0	0
21/10/2015	Oct	2015	Sentinel	mavimba	16	0	3	0	0	0	3	0	0	0	0	0	1	1	0
21/10/2015	Oct	2015	Sentinel	mavimba	16	0	3	0	0	0	3	0	0	0	0	0	0	0	0
21/10/2015	Oct	2015	Random	mavimba	16	0	1	0	0	0	1	0	0	1	0	0	0	1	0
21/10/2015	Oct	2015	Sentinel	mavimba	16	0	4	0	0	0	4	0	0	0	0	0	0	0	0
21/10/2015	Oct	2015	Sentinel	mavimba	16	0	0	0	0	0	0	0	0	0	0	0	0	0	0
22/10/2015	Oct	2015	Sentinel	mavimba	14	0	0	0	0	0	0	0	0	1	0	0	0	1	0
22/10/2015	Oct	2015	Sentinel	mavimba	14	0	0	0	0	0	0	0	0	0	0	0	0	0	0
22/10/2015	Oct	2015	Random	mavimba	14	0	0	0	0	0	0	0	0	0	0	0	0	0	0
22/10/2015	Oct	2015	Sentinel	mavimba	14	0	0	0	0	0	0	0	0	2	0	2	0	4	0
22/10/2015	Oct	2015	Random	mavimba	14	0	2	0	0	0	2	0	0	0	0	0	0	0	0
22/10/2015	Oct	2015	Random	mavimba	14	0	2	0	0	0	2	0	0	0	0	0	0	0	0
23/10/2015	Oct	2015	Random	kivukoni	6	0	0	0	0	0	0	0	0	0	0	0	0	0	0
23/10/2015	Oct	2015	Sentinel	kivukoni	6	0	0	0	0	0	0	0	0	0	0	0	0	0	0
23/10/2015	Oct	2015	Sentinel	kivukoni	6	1	0	0	0	0	0	0	0	0	0	0	0	0	0
23/10/2015	Oct	2015	Random	kivukoni	6	0	0	0	0	0	0	0	0	0	0	0	0	0	0
23/10/2015	Oct	2015	Sentinel	kivukoni	6	0	0	0	0	0	0	0	0	0	0	0	0	0	0
23/10/2015	Oct	2015	Random	kivukoni	6	0	0	0	0	0	0	0	0	0	0	0	0	0	0
28/10/2015	Oct	2015	Random	kivukoni	3	0	0	0	0	0	0	0	0	0	0	0	0	0	0
28/10/2015	Oct	2015	Random	kivukoni	3	0	0	0	0	0	0	0	0	0	0	0	0	0	0
28/10/2015	Oct	2015	Sentinel	kivukoni	3	0	0	0	0	0	0	0	0	0	0	0	0	0	0
28/10/2015	Oct	2015	Sentinel	kivukoni	3	0	0	0	0	0	0	0	0	0	0	0	0	0	0
28/10/2015	Oct	2015	Random	kivukoni	3	0	0	0	0	0	0	0	0	0	0	0	0	0	0
28/10/2015	Oct	2015	Sentinel	kivukoni	3	0	0	0	0	0	0	0	0	0	0	0	0	0	0
29/10/2015	Oct	2015	Sentinel	kivukoni	2	0	0	0	0	0	0	0	0	0	0	0	0	0	0
29/10/2015	Oct	2015	Sentinel	kivukoni	2	0	0	0	0	0	0	0	0	0	0	0	0	0	0
29/10/2015	Oct	2015	Random	kivukoni	2	0	0	0	0	0	0	0	0	0	0	0	0	0	0
29/10/2015	Oct	2015	Random	kivukoni	2	0	0	0	0	0	0	0	0	0	0	0	0	0	0
29/10/2015	Oct	2015	Sentinel	kivukoni	2	0	0	0	0	0	0	0	0	0	0	0	0	0	0
29/10/2015	Oct	2015	Random	kivukoni	2	0	0	0	0	0	0	0	0	0	0	0	0	0	0
30/10/2015	Oct	2015	Sentinel	mavimba	15	0	0	0	0	0	0	0	0	0	0	0	0	0	0
30/10/2015	Oct	2015	Random	mavimba	15	0	0	0	0	0	0	0	0	0	0	0	0	0	0
30/10/2015	Oct	2015	Random	mavimba	15	0	0	0	0	0	0	0	0	0	0	0	0	0	0
30/10/2015	Oct	2015	Random	mavimba	15	0	0	0	0	0	0	0	0	1	0	0	0	1	0
30/10/2015	Oct	2015	Sentinel	mavimba	15	0	0	0	0	0	0	0	0	0	0	0	0	0	0
30/10/2015	Oct	2015	Sentinel	mavimba	15	0	0	0	0	0	0	0	0	0	0	0	0	0	0
31/10/2015	Oct	2015	Sentinel	kivukoni	7	0	0	0	0	0	0	0	0	0	0	0	0	0	0
31/10/2015	Oct	2015	Sentinel	kivukoni	7	0	0	0	0	0	0	0	0	0	0	0	0	0	0
31/10/2015	Oct	2015	Random	kivukoni	7	0	1	0	0	0	1	0	0	0	0	0	0	0	0
31/10/2015	Oct	2015	Random	kivukoni	7	0	0	0	0	0	0	0	0	0	0	0	0	0	0
31/10/2015	Oct	2015	Sentinel	kivukoni	7	0	0	0	0	0	0	0	0	0	0	0	0	0	0
31/10/2015	Oct	2015	Random	kivukoni	7	0	4	0	0	0	4	0	0	1	0	0	0	1	0
11/3/2015	Nov	2015	Sentinel	minepa	8	0	0	0	0	0	0	0	0	0	0	0	0	0	0
11/3/2015	Nov	2015	Sentinel	minepa	8	0	0	0	0	0	0	0	0	0	0	0	0	0	0
11/3/2015	Nov	2015	Sentinel	minepa	8	0	0	0	0	0	0	0	0	0	0	0	0	0	0
11/3/2015	Nov	2015	Random	minepa	8	0	0	0	0	0	0	0	0	0	0	0	0	0	0
11/3/2015	Nov	2015	Random	minepa	8	0	1	0	0	0	1	0	0	0	0	0	0	0	0
11/3/2015	Nov	2015	Random	minepa	8	0	0	0	0	0	0	0	0	0	0	0	0	0	0
11/4/2015	Nov	2015	Random	kivukoni	2	0	0	1	0	0	1	0	0	0	0	0	0	0	0
11/4/2015	Nov	2015	Random	kivukoni	2	0	1	0	0	0	1	0	0	0	0	0	0	0	0
11/4/2015	Nov	2015	Sentinel	kivukoni	2	0	0	0	0	0	0	0	0	1	0	0	0	1	0
11/4/2015	Nov	2015	Random	kivukoni	2	0	0	0	0	0	0	0	0	0	0	0	0	0	0
11/4/2015	Nov	2015	Sentinel	kivukoni	2	0	0	0	0	0	0	0	0	0	0	0	0	0	0
11/4/2015	Nov	2015	Sentinel	kivukoni	2	0	0	0	0	0	0	0	0	0	0	0	0	0	0
11/5/2015	Nov	2015	Sentinel	mavimba	15	1	1	0	0	0	1	0	0	1	0	0	1	2	0
11/5/2015	Nov	2015	Random	mavimba	15	0	1	0	0	0	1	0	0	0	0	0	0	0	0
11/5/2015	Nov	2015	Sentinel	mavimba	15	0	1	0	0	0	1	0	0	0	0	0	0	0	0
11/5/2015	Nov	2015	Random	mavimba	15	0	0	1	0	0	1	0	0	0	0	0	0	0	0
11/5/2015	Nov	2015	Sentinel	mavimba	15	0	0	0	0	0	0	0	0	0	0	0	0	0	0
11/5/2015	Nov	2015	Random	mavimba	15	0	4	0	1	0	5	0	3	3	0	0	0	3	0
11/6/2015	Nov	2015	Sentinel	kivukoni	1	0	0	0	0	0	0	0	0	0	0	0	0	0	0
11/6/2015	Nov	2015	Random	kivukoni	1	0	0	0	0	0	0	0	0	0	0	0	0	0	0
11/6/2015	Nov	2015	Random	kivukoni	1	0	0	0	0	0	0	0	0	0	0	0	0	0	0
11/6/2015	Nov	2015	Random	kivukoni	1	0	0	0	0	0	0	0	0	0	0	0	0	0	0
11/6/2015	Nov	2015	Sentinel	kivukoni	1	0	1	0	0	0	1	0	0	0	0	0	0	0	0
11/6/2015	Nov	2015	Sentinel	kivukoni	1	0	0	0	0	0	0	0	0	0	0	0	0	0	0
11/10/2015	Nov	2015	Sentinel	minepa	9	0	0	0	0	0	0	0	0	1	0	0	0	1	0
11/10/2015	Nov	2015	Random	minepa	9	0	0	0	0	0	0	0	0	0	0	0	0	0	0
11/10/2015	Nov	2015	Sentinel	minepa	9	0	0	0	0	0	0	0	0	0	0	0	0	0	0
11/10/2015	Nov	2015	Random	minepa	9	0	1	0	0	0	1	0	0	0	0	0	0	0	0
11/10/2015	Nov	2015	Sentinel	minepa	9	0	0	0	0	0	0	0	0	0	0	0	0	0	0
11/10/2015	Nov	2015	Sentinel	minepa	9	0	0	0	0	0	0	0	0	0	0	0	0	0	0
11/11/2015	Nov	2015	Sentinel	minepa	10	0	0	0	0	0	0	0	0	0	0	0	0	0	0
11/11/2015	Nov	2015	Sentinel	minepa	10	0	0	0	0	0	0	0	0	0	0	0	0	0	0
11/11/2015	Nov	2015	Random	minepa	10	0	0	1	0	0	1	0	0	0	0	0	0	0	0
11/11/2015	Nov	2015	Sentinel	minepa	10	0	1	0	0	0	1	0	0	0	0	0	0	0	0
11/11/2015	Nov	2015	Random	minepa	10	0	0	0	1	0	1	0	0	2	0	0	0	2	0
11/11/2015	Nov	2015	Random	minepa	10	0	2	0	0	0	2	0	0	0	0	0	0	0	0
11/12/2015	Nov	2015	Sentinel	kivukoni	4	0	0	0	0	0	0	0	0	0	0	0	0	0	0
11/12/2015	Nov	2015	Sentinel	kivukoni	4	0	0	0	0	0	0	0	0	0	0	0	0	0	0
11/12/2015	Nov	2015	Sentinel	kivukoni	4	0	0	0	0	0	0	0	0	0	0	0	0	0	0
11/12/2015	Nov	2015	Random	kivukoni	4	0	0	0	0	0	0	0	0	0	0	0	0	0	0
11/12/2015	Nov	2015	Random	kivukoni	4	0	0	0	0	0	0	0	0	0	0	0	0	0	0
11/12/2015	Nov	2015	Random	kivukoni	4	0	0	0	0	0	0	0	0	0	0	0	0	0	0
13/11/2015	Nov	2015	Sentinel	mavimba	14	0	0	0	0	0	0	0	0	0	0	0	0	0	0
13/11/2015	Nov	2015	Sentinel	mavimba	14	0	0	0	0	0	0	0	0	0	0	0	0	0	0
13/11/2015	Nov	2015	Random	mavimba	14	0	0	0	0	0	0	0	0	0	0	0	0	0	0
13/11/2015	Nov	2015	Random	mavimba	14	0	0	0	0	0	0	0	0	0	0	0	0	0	0
13/11/2015	Nov	2015	Random	mavimba	14	0	0	0	0	0	0	0	0	0	0	0	0	0	0
13/11/2015	Nov	2015	Sentinel	mavimba	14	0	2	0	0	0	2	0	0	0	0	0	0	0	0
17/11/2015	Nov	2015	Random	mavimba	13	0	0	0	0	0	0	0	0	0	0	0	0	0	0
17/11/2015	Nov	2015	Sentinel	mavimba	13	0	0	0	0	0	0	0	0	0	0	0	0	0	0
17/11/2015	Nov	2015	Sentinel	mavimba	13	0	0	0	0	0	0	0	0	0	0	0	0	0	0
17/11/2015	Nov	2015	Random	mavimba	13	0	0	0	0	0	0	0	0	0	0	0	0	0	0
17/11/2015	Nov	2015	Random	mavimba	13	0	0	0	0	0	0	0	0	0	0	0	0	0	0
17/11/2015	Nov	2015	Sentinel	mavimba	13	0	1	0	0	0	1	0	0	2	0	1	0	3	0
18/11/2015	Nov	2015	Sentinel	minepa	11	0	3	0	0	0	3	0	0	0	0	0	0	0	0
18/11/2015	Nov	2015	Random	minepa	11	1	0	2	0	0	2	0	0	0	0	0	0	0	0
18/11/2015	Nov	2015	Sentinel	minepa	11	0	2	0	0	0	2	0	0	0	0	0	0	0	0
18/11/2015	Nov	2015	Random	minepa	11	0	2	0	0	0	2	0	0	0	0	0	0	0	0
18/11/2015	Nov	2015	Sentinel	minepa	11	0	3	0	0	0	3	0	0	0	0	0	0	0	0
18/11/2015	Nov	2015	Random	minepa	11	0	4	0	0	0	4	0	0	1	0	0	0	1	0
19/11/2015	Nov	2015	Random	kivukoni	5	0	0	1	0	0	1	0	0	0	0	0	0	0	0
19/11/2015	Nov	2015	Sentinel	kivukoni	5	0	0	0	0	0	0	0	0	0	0	0	0	0	0
19/11/2015	Nov	2015	Random	kivukoni	5	0	0	0	0	0	0	0	0	0	0	0	0	0	0
19/11/2015	Nov	2015	Sentinel	kivukoni	5	0	0	0	0	0	0	0	0	0	0	0	0	0	0
19/11/2015	Nov	2015	Random	kivukoni	5	0	0	0	0	0	0	0	0	0	0	0	0	0	0
19/11/2015	Nov	2015	Sentinel	kivukoni	5	0	0	0	0	0	0	0	0	0	0	0	0	0	0
20/11/2015	Nov	2015	Random	kivukoni	6	0	0	0	0	0	0	0	0	0	0	0	0	0	0
20/11/2015	Nov	2015	Random	kivukoni	6	0	0	0	0	0	0	0	0	0	0	0	0	0	0
20/11/2015	Nov	2015	Sentinel	kivukoni	6	0	0	0	0	0	0	0	0	0	0	0	0	0	0
20/11/2015	Nov	2015	Sentinel	kivukoni	6	0	0	0	0	0	0	0	0	0	0	0	0	0	0
20/11/2015	Nov	2015	Sentinel	kivukoni	6	0	0	0	0	0	0	0	0	0	0	0	0	0	0
20/11/2015	Nov	2015	Random	kivukoni	6	0	0	0	0	0	0	0	0	0	0	0	0	0	0
24/11/2015	Nov	2015	Random	minepa	12	0	0	0	0	0	0	0	0	1	0	0	0	1	0
24/11/2015	Nov	2015	Sentinel	minepa	12	0	0	0	0	0	0	0	0	0	0	0	0	0	0
24/11/2015	Nov	2015	Sentinel	minepa	12	0	0	0	0	0	0	0	0	0	0	0	0	0	0
24/11/2015	Nov	2015	Random	minepa	12	0	0	0	0	0	0	0	0	0	0	0	0	0	0
24/11/2015	Nov	2015	Random	minepa	12	0	1	0	0	0	1	0	0	0	0	0	0	0	0
24/11/2015	Nov	2015	Sentinel	minepa	12	0	1	0	1	1	3	0	0	0	0	0	0	0	0
25/11/2015	Nov	2015	Sentinel	mavimba	16	0	1	0	0	0	1	0	0	4	0	0	0	4	0
25/11/2015	Nov	2015	Random	mavimba	16	0	2	0	0	0	2	0	0	0	1	0	5	6	0
25/11/2015	Nov	2015	Sentinel	mavimba	16	0	1	3	0	0	4	0	0	0	0	0	0	0	0
25/11/2015	Nov	2015	Random	mavimba	16	0	0	0	0	0	0	0	0	0	0	0	0	0	0
25/11/2015	Nov	2015	Random	mavimba	16	0	0	0	0	0	0	0	0	1	1	0	0	2	0
25/11/2015	Nov	2015	Random	mavimba	16	0	0	0	0	0	0	0	0	0	0	0	0	0	0
26/11/2015	Nov	2015	Sentinel	kivukoni	7	0	0	0	0	0	0	0	0	0	0	0	0	0	0
26/11/2015	Nov	2015	Sentinel	kivukoni	7	0	0	0	0	0	0	0	0	0	0	0	0	0	0
26/11/2015	Nov	2015	Sentinel	kivukoni	7	0	0	0	0	0	0	0	0	0	0	0	0	0	0
26/11/2015	Nov	2015	Random	kivukoni	7	0	0	0	0	0	0	0	0	0	0	0	0	0	0
26/11/2015	Nov	2015	Random	kivukoni	7	0	0	0	0	0	0	0	0	0	0	0	0	0	0
26/11/2015	Nov	2015	Random	kivukoni	7	0	0	0	0	0	0	0	0	0	0	0	0	0	0
27/11/2015	Nov	2015	Sentinel	kivukoni	3	0	0	0	0	0	0	0	0	0	0	0	0	0	0
27/11/2015	Nov	2015	Random	kivukoni	3	0	0	0	0	0	0	0	0	0	0	0	0	0	0
27/11/2015	Nov	2015	Random	kivukoni	3	0	0	0	1	0	1	0	0	0	0	0	0	0	0
27/11/2015	Nov	2015	Sentinel	kivukoni	3	0	0	0	0	0	0	0	0	0	0	0	0	0	0
27/11/2015	Nov	2015	Random	kivukoni	3	0	0	0	0	0	0	0	0	0	0	0	0	0	0
27/11/2015	Nov	2015	Sentinel	kivukoni	3	0	0	0	0	0	0	0	0	0	0	0	0	0	0
12/2/2015	Dec	2015	Random	kivukoni	4	0	0	0	0	0	0	0	0	0	0	0	0	0	2.816901408
12/2/2015	Dec	2015	Sentinel	kivukoni	4	0	0	0	0	0	0	0	0	0	0	0	0	0	2.816901408
12/2/2015	Dec	2015	Random	kivukoni	4	0	0	0	0	0	0	0	0	0	0	0	0	0	2.816901408
12/2/2015	Dec	2015	Random	kivukoni	4	0	1	1	0	0	2	0	0	0	0	0	0	0	2.816901408
12/2/2015	Dec	2015	Sentinel	kivukoni	4	0	0	0	0	0	0	0	0	0	0	0	0	0	2.816901408
12/2/2015	Dec	2015	Sentinel	kivukoni	4	0	0	0	0	0	0	0	0	0	0	0	0	0	2.816901408
12/3/2015	Dec	2015	Random	mavimba	15	0	4	0	0	0	4	0	0	6	0	0	0	6	2.816901408
12/3/2015	Dec	2015	Sentinel	mavimba	15	0	0	0	0	0	0	0	0	2	0	0	0	2	2.816901408
12/3/2015	Dec	2015	Sentinel	mavimba	15	0	0	0	0	0	0	0	0	0	0	0	0	0	2.816901408
12/3/2015	Dec	2015	Sentinel	mavimba	15	0	0	0	0	0	0	0	0	0	0	0	0	0	2.816901408
12/3/2015	Dec	2015	Random	mavimba	15	0	0	0	0	0	0	0	0	0	0	0	1	1	2.816901408
12/3/2015	Dec	2015	Random	mavimba	15	0	1	0	0	0	1	0	0	0	0	0	0	0	2.816901408
12/4/2015	Dec	2015	Sentinel	minepa	9	0	3	1	0	0	4	0	0	0	0	0	0	0	2.816901408
12/4/2015	Dec	2015	Random	minepa	9	0	9	3	0	0	12	0	0	0	0	0	0	0	2.816901408
12/4/2015	Dec	2015	Sentinel	minepa	9	0	23	4	0	0	27	0	0	2	0	0	0	2	2.816901408
12/4/2015	Dec	2015	Random	minepa	9	1	5	0	0	0	5	0	0	0	0	0	0	0	2.816901408
12/4/2015	Dec	2015	Sentinel	minepa	9	0	0	0	0	0	0	0	0	0	0	0	0	0	2.816901408
12/4/2015	Dec	2015	Random	minepa	9	0	0	0	0	0	0	0	0	0	0	0	0	0	2.816901408
12/5/2015	Dec	2015	Sentinel	minepa	12	2	14	0	0	3	17	0	0	9	0	0	1	10	2.816901408
12/5/2015	Dec	2015	Random	minepa	12	1	6	0	0	0	6	0	0	0	0	0	0	0	2.816901408
12/5/2015	Dec	2015	Sentinel	minepa	12	0	50	2	0	0	52	0	0	2	0	0	0	2	2.816901408
12/5/2015	Dec	2015	Sentinel	minepa	12	6	13	0	0	2	15	0	0	0	0	0	0	0	2.816901408
12/5/2015	Dec	2015	Random	minepa	12	0	13	0	0	0	13	0	0	0	0	0	0	0	2.816901408
12/5/2015	Dec	2015	Random	minepa	12	2	26	2	0	0	28	0	0	1	0	0	1	2	2.816901408
12/8/2015	Dec	2015	Random	mavimba	14	0	0	0	0	0	0	0	0	1	0	0	1	2	2.816901408
12/8/2015	Dec	2015	Sentinel	mavimba	14	0	2	0	0	0	2	0	0	3	11	0	0	14	2.816901408
12/8/2015	Dec	2015	Sentinel	mavimba	14	0	4	0	0	0	4	0	0	2	0	0	0	2	2.816901408
12/8/2015	Dec	2015	Random	mavimba	14	0	5	0	0	0	5	0	0	2	0	0	0	2	2.816901408
12/8/2015	Dec	2015	Sentinel	mavimba	14	0	0	0	0	0	0	0	0	0	0	0	0	0	2.816901408
12/8/2015	Dec	2015	Random	mavimba	14	0	3	0	0	0	3	0	0	1	0	0	0	1	2.816901408
12/9/2015	Dec	2015	Random	kivukoni	5	0	0	0	0	0	0	0	0	0	0	0	0	0	2.816901408
12/9/2015	Dec	2015	Sentinel	kivukoni	5	0	0	0	0	0	0	0	0	0	0	0	0	0	2.816901408
12/9/2015	Dec	2015	Random	kivukoni	5	0	0	0	0	0	0	0	0	0	0	0	0	0	2.816901408
12/9/2015	Dec	2015	Random	kivukoni	5	0	0	0	0	0	0	0	0	0	0	0	0	0	2.816901408
12/9/2015	Dec	2015	Sentinel	kivukoni	5	0	1	0	0	0	1	0	0	0	0	0	0	0	2.816901408
12/9/2015	Dec	2015	Sentinel	kivukoni	5	0	1	0	0	0	1	0	0	1	0	0	0	1	2.816901408
10/12/2015	Dec	2015	Sentinel	kivukoni	2	0	3	0	0	0	3	0	0	0	0	0	0	0	2.816901408
10/12/2015	Dec	2015	Random	kivukoni	2	0	0	0	0	0	0	0	0	1	0	0	0	1	2.816901408
10/12/2015	Dec	2015	Sentinel	kivukoni	2	0	0	0	0	0	0	0	0	0	0	0	0	0	2.816901408
10/12/2015	Dec	2015	Random	kivukoni	2	0	0	0	0	0	0	0	0	0	0	0	0	0	2.816901408
10/12/2015	Dec	2015	Sentinel	kivukoni	2	0	0	0	0	0	0	0	0	0	0	0	0	0	2.816901408
10/12/2015	Dec	2015	Random	kivukoni	2	0	1	0	0	0	1	0	0	0	0	0	0	0	2.816901408
11/12/2015	Dec	2015	Sentinel	kivukoni	1	0	1	0	0	0	1	0	0	0	0	0	0	0	2.816901408
11/12/2015	Dec	2015	Random	kivukoni	1	0	0	0	0	0	0	0	0	0	0	0	0	0	2.816901408
11/12/2015	Dec	2015	Random	kivukoni	1	0	0	0	0	0	0	0	0	0	0	0	0	0	2.816901408
11/12/2015	Dec	2015	Sentinel	kivukoni	1	0	0	0	0	0	0	0	0	0	0	0	0	0	2.816901408
11/12/2015	Dec	2015	Sentinel	kivukoni	1	0	0	0	0	0	0	0	0	0	0	0	0	0	2.816901408
11/12/2015	Dec	2015	Random	kivukoni	1	0	0	0	0	0	0	0	0	0	0	0	0	0	2.816901408
15/12/2015	Dec	2015	Random	minepa	11	0	22	1	0	2	25	0	0	5	0	0	0	5	2.816901408
15/12/2015	Dec	2015	Random	minepa	11	0	15	0	0	0	15	0	0	0	0	0	0	0	2.816901408
15/12/2015	Dec	2015	Sentinel	minepa	11	2	10	0	0	0	10	0	0	0	0	0	0	0	2.816901408
15/12/2015	Dec	2015	Sentinel	minepa	11	3	3	0	1	0	4	0	0	0	0	0	0	0	2.816901408
15/12/2015	Dec	2015	Random	minepa	11	2	5	0	0	0	5	0	0	1	0	0	0	1	2.816901408
15/12/2015	Dec	2015	Sentinel	minepa	11	0	21	0	0	0	21	0	0	1	0	0	0	1	2.816901408
16/12/2015	Dec	2015	Sentinel	minepa	10	0	6	0	0	1	7	0	0	3	0	0	0	3	2.816901408
16/12/2015	Dec	2015	Random	minepa	10	1	27	0	0	0	27	0	0	2	0	0	0	2	2.816901408
16/12/2015	Dec	2015	Sentinel	minepa	10	1	40	2	3	2	47	0	0	0	0	0	0	0	2.816901408
16/12/2015	Dec	2015	Sentinel	minepa	10	0	18	0	0	1	19	0	0	0	0	0	0	0	2.816901408
16/12/2015	Dec	2015	Random	minepa	10	0	7	0	0	1	8	0	0	1	0	0	0	1	2.816901408
16/12/2015	Dec	2015	Random	minepa	10	5	29	0	0	2	31	0	0	0	0	0	0	0	2.816901408
17/12/2015	Dec	2015	Sentinel	kivukoni	3	0	0	0	0	0	0	0	0	0	0	0	0	0	2.816901408
17/12/2015	Dec	2015	Sentinel	kivukoni	3	0	2	0	0	0	2	0	0	0	0	0	0	0	2.816901408
17/12/2015	Dec	2015	Sentinel	kivukoni	3	0	0	0	0	0	0	0	0	0	0	0	0	0	2.816901408
17/12/2015	Dec	2015	Random	kivukoni	3	0	2	0	0	0	2	0	0	0	0	0	0	0	2.816901408
17/12/2015	Dec	2015	Random	kivukoni	3	0	4	0	0	0	4	0	0	0	0	0	0	0	2.816901408
17/12/2015	Dec	2015	Random	kivukoni	3	0	0	0	0	0	0	0	0	0	0	0	0	0	2.816901408
18/12/2015	Dec	2015	Random	minepa	8	0	0	2	0	0	2	0	0	0	0	0	0	0	2.816901408
18/12/2015	Dec	2015	Sentinel	minepa	8	0	1	0	1	0	2	0	0	0	0	0	0	0	2.816901408
18/12/2015	Dec	2015	Sentinel	minepa	8	0	6	0	0	0	6	0	0	0	0	0	0	0	2.816901408
18/12/2015	Dec	2015	Sentinel	minepa	8	0	1	2	0	0	3	0	0	0	0	0	0	0	2.816901408
18/12/2015	Dec	2015	Random	minepa	8	0	1	0	0	0	1	0	0	0	0	0	0	0	2.816901408
18/12/2015	Dec	2015	Random	minepa	8	0	9	0	0	0	9	0	0	1	0	0	0	1	2.816901408
19/12/2015	Dec	2015	Random	mavimba	13	0	0	0	0	0	0	0	0	0	0	0	0	0	2.816901408
19/12/2015	Dec	2015	Sentinel	mavimba	13	0	0	0	0	0	0	0	0	0	0	0	0	0	2.816901408
19/12/2015	Dec	2015	Random	mavimba	13	0	0	0	0	0	0	0	0	0	0	0	0	0	2.816901408
19/12/2015	Dec	2015	Sentinel	mavimba	13	0	0	0	0	0	0	0	0	0	0	0	0	0	2.816901408
19/12/2015	Dec	2015	Random	mavimba	13	0	1	0	0	0	1	0	0	0	0	0	0	0	2.816901408
19/12/2015	Dec	2015	Sentinel	mavimba	13	0	0	0	0	0	0	0	0	0	0	0	0	0	2.816901408
20/12/2015	Dec	2015	Sentinel	kivukoni	7	0	0	0	0	0	0	0	0	0	0	0	0	0	2.816901408
20/12/2015	Dec	2015	Random	kivukoni	7	0	1	0	0	0	1	0	0	0	0	0	0	0	2.816901408
20/12/2015	Dec	2015	Random	kivukoni	7	0	1	0	0	0	1	0	0	0	0	0	0	0	2.816901408
20/12/2015	Dec	2015	Sentinel	kivukoni	7	0	0	0	0	0	0	0	0	0	0	0	0	0	2.816901408
20/12/2015	Dec	2015	Sentinel	kivukoni	7	0	0	0	0	0	0	0	0	0	0	0	0	0	2.816901408
20/12/2015	Dec	2015	Random	kivukoni	7	0	0	0	0	0	0	0	0	0	0	0	0	0	2.816901408
6/1/2016	Jan	2016	Random	kivukoni	6	0	3	0	0	0	3	0	0	1	1	0	0	2	2.816901408
6/1/2016	Jan	2016	Sentinel	kivukoni	6	0	4	0	0	0	4	0	0	0	0	0	0	0	2.816901408
6/1/2016	Jan	2016	Random	kivukoni	6	0	3	0	0	0	3	0	0	0	0	0	0	0	2.816901408
6/1/2016	Jan	2016	Sentinel	kivukoni	6	0	0	0	0	0	0	0	0	0	0	0	0	0	2.816901408
6/1/2016	Jan	2016	Random	kivukoni	6	2	7	4	0	0	11	0	0	0	0	0	0	0	2.816901408
6/1/2016	Jan	2016	Sentinel	kivukoni	6	0	3	8	0	0	11	0	0	0	0	0	0	0	2.816901408
7/1/2016	Jan	2016	Sentinel	mavimba	16	0	0	0	0	0	0	0	0	0	0	0	0	0	2.816901408
7/1/2016	Jan	2016	Sentinel	mavimba	16	0	7	1	0	0	8	0	0	1	0	0	0	1	2.816901408
7/1/2016	Jan	2016	Sentinel	mavimba	16	0	2	0	0	0	2	0	0	3	0	0	0	3	2.816901408
7/1/2016	Jan	2016	Random	mavimba	16	0	1	0	0	0	1	0	0	0	0	0	0	0	2.816901408
7/1/2016	Jan	2016	Random	mavimba	16	0	0	0	0	0	0	0	0	3	0	0	0	3	2.816901408
7/1/2016	Jan	2016	Random	mavimba	16	0	0	0	0	0	0	0	0	0	0	0	0	0	2.816901408
3/3/2015	Mar	2015	Sentinel	minepa	12	6	1	0	0	5	6	0	0	0	0	0	0	0	0.401606426
3/3/2015	Mar	2015	Sentinel	minepa	12	0	0	0	0	0	0	0	0	0	0	0	0	0	0.401606426
3/3/2015	Mar	2015	Random	minepa	12	0	1	0	0	0	1	0	0	0	0	0	0	0	0.401606426
3/3/2015	Mar	2015	Random	minepa	12	0	16	3	0	0	19	0	0	1	0	0	0	1	0.401606426
3/3/2015	Mar	2015	Sentinel	minepa	12	0	0	0	0	0	0	0	0	0	0	0	0	0	0.401606426
3/3/2015	Mar	2015	Random	minepa	12	1	1	1	0	0	2	0	1	1	0	0	0	1	0.401606426
3/4/2015	Mar	2015	Sentinel	mavimba	16	0	2	0	0	0	2	0	0	6	0	0	0	6	0.401606426
3/4/2015	Mar	2015	Sentinel	mavimba	16	0	0	0	0	0	0	0	0	0	0	0	0	0	0.401606426
3/4/2015	Mar	2015	Random	mavimba	16	0	0	0	0	0	0	0	1	0	0	0	0	0	0.401606426
3/4/2015	Mar	2015	Random	mavimba	16	0	0	0	0	0	0	0	0	0	0	0	0	0	0.401606426
3/4/2015	Mar	2015	Sentinel	mavimba	16	0	0	0	0	0	0	0	0	0	0	0	0	0	0.401606426
3/4/2015	Mar	2015	Random	mavimba	16	0	0	0	0	0	0	0	1	0	0	0	0	0	0.401606426
3/5/2015	Mar	2015	Random	minepa	9	0	0	0	0	0	0	0	0	0	0	0	0	0	0.401606426
3/5/2015	Mar	2015	Random	minepa	9	0	0	0	0	0	0	0	0	0	0	0	0	0	0.401606426
3/5/2015	Mar	2015	Sentinel	minepa	9	1	0	0	0	0	0	0	0	0	0	0	0	0	0.401606426
3/5/2015	Mar	2015	Sentinel	minepa	9	0	0	0	0	0	0	0	0	0	0	0	0	0	0.401606426
3/5/2015	Mar	2015	Sentinel	minepa	9	0	0	0	0	0	0	0	0	0	0	0	0	0	0.401606426
3/5/2015	Mar	2015	Random	minepa	9	0	0	0	0	0	0	0	0	0	0	0	0	0	0.401606426
3/6/2015	Mar	2015	Random	minepa	10	0	0	0	0	0	0	0	0	0	0	0	0	0	0.401606426
3/6/2015	Mar	2015	Random	minepa	10	0	0	0	0	0	0	0	0	0	0	0	0	0	0.401606426
3/6/2015	Mar	2015	Random	minepa	10	1	2	1	0	0	3	0	0	0	0	0	0	0	0.401606426
3/6/2015	Mar	2015	Sentinel	minepa	10	0	0	0	0	0	0	0	0	0	0	0	0	0	0.401606426
3/6/2015	Mar	2015	Sentinel	minepa	10	0	1	0	0	0	1	0	0	0	0	0	0	0	0.401606426
3/6/2015	Mar	2015	Sentinel	minepa	10	0	0	0	0	0	0	0	0	0	0	0	0	0	0.401606426
3/10/2015	Mar	2015	Random	kivukoni	3	0	0	0	0	0	0	0	0	0	0	0	0	0	0.401606426
3/10/2015	Mar	2015	Random	kivukoni	3	0	0	0	0	0	0	0	0	0	0	0	0	0	0.401606426
3/10/2015	Mar	2015	Sentinel	kivukoni	3	0	0	0	0	0	0	0	0	0	0	0	0	0	0.401606426
3/10/2015	Mar	2015	Sentinel	kivukoni	3	0	0	0	0	0	0	0	0	0	0	0	0	0	0.401606426
3/10/2015	Mar	2015	Random	kivukoni	3	0	0	0	0	0	0	0	0	0	0	0	0	0	0.401606426
3/10/2015	Mar	2015	Random	kivukoni	3	0	0	0	0	0	0	0	0	0	0	0	0	0	0.401606426
3/11/2015	Mar	2015	Sentinel	kivukoni	5	0	0	0	0	0	0	0	0	0	0	0	0	0	0.401606426
3/11/2015	Mar	2015	Random	kivukoni	5	0	0	0	0	0	0	0	0	0	0	0	0	0	0.401606426
3/11/2015	Mar	2015	Random	kivukoni	5	0	0	0	0	0	0	0	0	0	0	0	0	0	0.401606426
3/11/2015	Mar	2015	Sentinel	kivukoni	5	0	0	0	0	0	0	0	0	0	0	0	0	0	0.401606426
3/11/2015	Mar	2015	Sentinel	kivukoni	5	0	0	0	0	0	0	0	0	0	0	0	0	0	0.401606426
3/11/2015	Mar	2015	Sentinel	kivukoni	5	0	0	0	0	0	0	0	0	0	0	0	0	0	0.401606426
3/12/2105	Mar	2015	Sentinel	mavimba	14	0	1	0	0	0	1	0	0	0	0	0	0	0	0.401606426
3/12/2105	Mar	2015	Random	mavimba	14	0	0	0	0	0	0	0	0	0	0	0	0	0	0.401606426
3/12/2105	Mar	2015	Random	mavimba	14	0	0	0	0	0	0	0	0	0	0	0	0	0	0.401606426
3/12/2105	Mar	2015	Sentinel	mavimba	14	0	0	0	0	0	0	0	0	0	0	0	0	0	0.401606426
3/12/2105	Mar	2015	Sentinel	mavimba	14	0	0	0	0	0	0	0	0	0	0	0	0	0	0.401606426
3/12/2105	Mar	2015	Random	mavimba	14	0	0	0	0	0	0	0	0	0	0	0	0	0	0.401606426
13/03/2015	Mar	2015	Random	mavimba	7	0	0	0	0	0	0	0	0	0	0	0	0	0	0.401606426
13/03/2015	Mar	2015	Random	kivukoni	7	0	1	0	0	0	1	0	0	0	0	0	0	0	0.401606426
13/03/2015	Mar	2015	Sentinel	kivukoni	7	0	0	0	0	0	0	0	0	0	0	0	0	0	0.401606426
13/03/2015	Mar	2015	Sentinel	kivukoni	7	0	0	0	0	0	0	0	0	0	0	0	0	0	0.401606426
13/03/2015	Mar	2015	Random	kivukoni	7	0	0	0	0	0	0	0	0	0	0	0	0	0	0.401606426
13/03/2015	Mar	2015	Sentinel	kivukoni	7	0	0	0	0	0	0	0	0	0	0	0	0	0	0.401606426
17/03/2015	Mar	2015	Sentinel	mavimba	13	0	0	0	0	0	0	0	0	0	0	0	0	0	0.401606426
17/03/2015	Mar	2015	Random	mavimba	13	0	0	0	0	0	0	0	0	0	0	0	0	0	0.401606426
17/03/2015	Mar	2015	Random	mavimba	13	0	0	0	0	0	0	0	0	1	0	0	0	1	0.401606426
17/03/2015	Mar	2015	Sentinel	mavimba	13	0	0	0	0	0	0	0	0	0	0	0	0	0	0.401606426
17/03/2015	Mar	2015	Sentinel	mavimba	13	0	0	0	0	0	0	0	0	0	0	0	0	0	0.401606426
17/03/2015	Mar	2015	Random	mavimba	13	0	0	0	0	0	0	0	0	0	0	0	0	0	0.401606426
19/03/2015	Mar	2015	Sentinel	kivukoni	6	1	0	0	0	0	0	0	0	0	0	0	0	0	0.401606426
19/03/2015	Mar	2015	Random	kivukoni	6	0	0	0	0	0	0	0	0	0	0	0	0	0	0.401606426
19/03/2015	Mar	2015	Random	kivukoni	6	0	0	0	0	0	0	0	0	0	0	0	0	0	0.401606426
19/03/2015	Mar	2015	Random	kivukoni	6	0	0	0	0	0	0	0	0	0	0	0	0	0	0.401606426
19/03/2015	Mar	2015	Sentinel	kivukoni	6	0	0	0	0	0	0	0	0	0	0	0	0	0	0.401606426
19/03/2015	Mar	2015	Sentinel	kivukoni	6	0	0	0	0	0	0	0	0	0	0	0	0	0	0.401606426
20/03/2015	Mar	2015	Random	minepa	8	0	0	0	0	0	0	0	0	0	0	0	0	0	0.401606426
20/03/2015	Mar	2015	Random	minepa	8	0	0	0	0	0	0	0	0	0	0	0	0	0	0.401606426
20/03/2015	Mar	2015	Sentinel	minepa	8	0	0	0	0	0	0	0	0	0	0	0	0	0	0.401606426
20/03/2015	Mar	2015	Random	minepa	8	0	0	0	0	0	0	0	0	0	1	0	1	2	0.401606426
20/03/2015	Mar	2015	Sentinel	minepa	8	0	0	0	0	0	0	0	0	0	0	0	0	0	0.401606426
20/03/2015	Mar	2015	Sentinel	minepa	8	0	0	0	0	0	0	0	0	0	0	0	0	0	0.401606426
21/03/2015	Mar	2015	Random	kivukoni	1	0	0	0	0	0	0	0	0	0	0	0	0	0	0.401606426
21/03/2015	Mar	2015	Sentinel	kivukoni	1	0	0	0	0	0	0	0	0	0	0	0	0	0	0.401606426
21/03/2015	Mar	2015	Sentinel	kivukoni	1	0	0	0	0	0	0	0	0	0	0	0	0	0	0.401606426
21/03/2015	Mar	2015	Random	kivukoni	1	0	0	0	0	0	0	0	0	0	0	0	0	0	0.401606426
21/03/2015	Mar	2015	Random	kivukoni	1	0	0	0	0	0	0	0	0	0	0	0	0	0	0.401606426
23/03/2015	Mar	2015	Random	mavimba	15	0	0	0	0	0	0	0	0	0	0	0	0	0	0.401606426
23/03/2015	Mar	2015	Random	mavimba	15	0	0	0	0	0	0	0	0	0	0	0	0	0	0.401606426
23/03/2015	Mar	2015	Sentinel	mavimba	15	0	0	0	0	0	0	0	0	0	0	0	0	0	0.401606426
23/03/2015	Mar	2015	Random	mavimba	15	0	0	0	0	0	0	0	0	0	0	0	0	0	0.401606426
23/03/2015	Mar	2015	Sentinel	mavimba	15	0	0	0	0	0	0	0	0	0	0	0	0	0	0.401606426
23/03/2015	Mar	2015	Sentinel	mavimba	15	0	0	0	0	0	0	0	0	0	0	0	0	0	0.401606426
24/03/2015	Mar	2015	Sentinel	minepa	11	0	0	0	0	0	0	0	0	0	0	0	0	0	0.401606426
24/03/2015	Mar	2015	Random	minepa	11	0	0	0	0	0	0	0	0	0	0	0	0	0	0.401606426
24/03/2015	Mar	2015	Random	minepa	11	0	0	0	0	0	0	0	0	0	0	0	0	0	0.401606426
24/03/2015	Mar	2015	Random	minepa	11	0	0	0	0	0	0	0	0	0	0	0	0	0	0.401606426
24/03/2015	Mar	2015	Random	minepa	11	0	0	0	0	0	0	0	0	0	0	0	0	0	0.401606426
24/03/2015	Mar	2015	Sentinel	minepa	11	0	0	0	0	0	0	0	0	0	0	0	0	0	0.401606426
26/03/2015	Mar	2015	Sentinel	kivukoni	2	0	0	0	0	0	0	0	0	0	0	0	0	0	0.401606426
26/03/2015	Mar	2015	Random	kivukoni	2	1	3	0	0	0	3	0	0	0	0	0	0	0	0.401606426
26/03/2015	Mar	2015	Random	kivukoni	2	0	0	0	0	0	0	0	0	0	0	0	0	0	0.401606426
26/03/2015	Mar	2015	Sentinel	kivukoni	2	0	0	0	0	0	0	0	0	0	0	0	0	0	0.401606426
26/03/2015	Mar	2015	Random	kivukoni	2	0	0	0	0	0	0	0	0	0	0	0	0	0	0.401606426
26/03/2015	Mar	2015	Sentinel	kivukoni	2	0	0	0	0	0	0	0	0	0	0	0	0	0	0.401606426
28/03/2015	Mar	2015	Sentinel	kivukoni	4	0	0	0	0	0	0	0	0	0	0	0	0	0	0.401606426
28/03/2015	Mar	2015	Random	kivukoni	4	0	0	0	0	0	0	0	0	0	0	0	0	0	0.401606426
28/03/2015	Mar	2015	Random	kivukoni	4	0	0	0	0	0	0	0	0	0	0	0	0	0	0.401606426
28/03/2015	Mar	2015	Random	kivukoni	4	0	0	0	0	0	0	0	0	0	0	0	0	0	0.401606426
28/03/2015	Mar	2015	Sentinel	kivukoni	4	0	0	0	0	0	0	0	0	0	0	0	0	0	0.401606426
28/03/2015	Mar	2015	Sentinel	kivukoni	4	0	0	0	0	0	0	0	0	0	0	0	0	0	0.401606426
31/03/2015	Mar	2015	Sentinel	kivukoni	6	0	0	0	0	0	0	0	0	0	0	0	0	0	0.401606426
31/03/2015	Mar	2015	Random	kivukoni	6	0	0	0	0	0	0	0	0	0	0	0	0	0	0.401606426
31/03/2015	Mar	2015	Random	kivukoni	6	0	0	0	0	0	0	0	0	0	0	0	0	0	0.401606426
31/03/2015	Mar	2015	Random	kivukoni	6	0	0	0	0	0	0	0	0	0	0	0	0	0	0.401606426
31/03/2015	Mar	2015	Sentinel	kivukoni	6	0	0	0	0	0	0	0	0	0	0	0	0	0	0.401606426
31/03/2015	Mar	2015	Sentinel	kivukoni	6	0	0	0	0	0	0	0	0	0	0	0	0	0	0.401606426
4/1/2015	Apr	2015	Sentinel	mavimba	15	0	0	0	0	0	0	0	0	0	0	0	0	0	1.243339254
4/1/2015	Apr	2015	Sentinel	mavimba	15	4	0	0	0	0	0	0	0	0	0	0	0	0	1.243339254
4/1/2015	Apr	2015	Random	mavimba	15	3	0	0	0	0	0	0	0	0	0	0	0	0	1.243339254
4/1/2015	Apr	2015	Random	mavimba	15	0	0	0	0	0	0	0	0	0	0	0	0	0	1.243339254
4/1/2015	Apr	2015	Random	mavimba	15	0	0	0	0	0	0	0	0	0	0	0	0	0	1.243339254
4/1/2015	Apr	2015	Sentinel	mavimba	15	0	0	0	0	0	0	0	0	0	0	0	0	0	1.243339254
4/2/2015	Apr	2015	Sentinel	kivukoni	5	0	0	0	0	0	0	0	0	0	0	0	0	0	1.243339254
4/2/2015	Apr	2015	Sentinel	kivukoni	5	0	0	0	0	0	0	0	0	0	0	0	0	0	1.243339254
4/2/2015	Apr	2015	Sentinel	kivukoni	5	0	0	0	0	0	0	0	0	0	0	0	0	0	1.243339254
4/2/2015	Apr	2015	Random	kivukoni	5	0	0	0	0	0	0	0	0	0	0	0	0	0	1.243339254
4/2/2015	Apr	2015	Random	kivukoni	5	0	0	0	0	0	0	0	0	0	0	0	0	0	1.243339254
4/2/2015	Apr	2015	Random	kivukoni	5	0	0	0	0	0	0	0	0	0	0	0	0	0	1.243339254
4/3/2015	Apr	2015	Random	minepa	10	2	0	0	0	0	0	0	0	0	0	0	0	0	1.243339254
4/3/2015	Apr	2015	Sentinel	minepa	10	0	0	0	0	0	0	0	0	0	0	0	0	0	1.243339254
4/3/2015	Apr	2015	Sentinel	minepa	10	0	0	0	0	0	0	0	0	0	0	0	0	0	1.243339254
4/3/2015	Apr	2015	Random	minepa	10	0	0	0	0	0	0	0	0	0	0	0	0	0	1.243339254
4/3/2015	Apr	2015	Random	minepa	10	0	1	0	0	0	1	0	0	0	0	0	0	0	1.243339254
4/3/2015	Apr	2015	Sentinel	minepa	10	0	0	0	0	0	0	0	0	0	0	0	0	0	1.243339254
4/7/2015	Apr	2015	Sentinel	kivukoni	6	0	0	0	0	0	0	0	0	0	0	0	0	0	1.243339254
4/7/2015	Apr	2015	Random	kivukoni	6	0	0	0	0	0	0	0	0	0	0	0	0	0	1.243339254
4/7/2015	Apr	2015	Random	kivukoni	6	0	0	0	0	0	0	0	0	0	0	0	0	0	1.243339254
4/7/2015	Apr	2015	Sentinel	kivukoni	6	0	0	0	0	0	0	0	0	0	0	0	0	0	1.243339254
4/7/2015	Apr	2015	Sentinel	kivukoni	6	0	0	0	0	0	0	0	0	0	0	0	0	0	1.243339254
4/7/2015	Apr	2015	Random	kivukoni	6	0	0	0	0	0	0	0	0	0	0	0	0	0	1.243339254
4/8/2015	Apr	2015	Sentinel	minepa	12	0	0	0	0	0	0	0	0	0	0	0	0	0	1.243339254
4/8/2015	Apr	2015	Sentinel	minepa	12	0	0	0	0	0	0	0	0	0	0	0	0	0	1.243339254
4/8/2015	Apr	2015	Random	minepa	12	0	0	0	0	0	0	0	0	0	0	0	0	0	1.243339254
4/8/2015	Apr	2015	Sentinel	minepa	12	0	0	0	0	0	0	0	0	0	0	0	0	0	1.243339254
4/8/2015	Apr	2015	Random	minepa	12	0	0	0	0	0	0	0	0	0	0	0	0	0	1.243339254
4/8/2015	Apr	2015	Random	minepa	12	0	0	0	0	0	0	0	0	0	0	0	0	0	1.243339254
4/9/2015	Apr	2015	Sentinel	minepa	9	0	0	0	0	0	0	0	0	0	0	0	0	0	1.243339254
4/9/2015	Apr	2015	Sentinel	minepa	9	0	0	0	0	0	0	0	0	0	0	0	0	0	1.243339254
4/9/2015	Apr	2015	Sentinel	minepa	9	0	0	0	0	0	0	0	0	0	0	0	0	0	1.243339254
4/9/2015	Apr	2015	Random	minepa	9	0	0	0	0	0	0	0	0	0	0	0	0	0	1.243339254
4/9/2015	Apr	2015	Random	minepa	9	0	0	0	0	0	0	0	0	1	0	0	0	1	1.243339254
4/9/2015	Apr	2015	Random	minepa	9	0	0	0	0	0	0	0	0	0	0	0	0	0	1.243339254
4/10/2015	Apr	2015	Sentinel	mavimba	14	0	0	0	0	0	0	0	0	0	0	0	0	0	1.243339254
4/10/2015	Apr	2015	Random	mavimba	14	0	0	0	0	0	0	0	0	0	0	0	0	0	1.243339254
4/10/2015	Apr	2015	Sentinel	mavimba	14	0	0	0	0	0	0	0	0	0	0	0	0	0	1.243339254
4/10/2015	Apr	2015	Sentinel	mavimba	14	0	0	0	0	0	0	0	0	0	0	0	0	0	1.243339254
4/10/2015	Apr	2015	Random	mavimba	14	0	0	0	0	0	0	0	0	0	0	0	0	0	1.243339254
4/10/2015	Apr	2015	Random	mavimba	14	0	0	0	0	0	0	0	0	0	0	0	0	0	1.243339254
14/04/2015	Apr	2015	Random	mavimba	13	0	0	0	0	0	0	0	0	0	0	0	0	0	1.243339254
14/04/2015	Apr	2015	Sentinel	mavimba	13	0	0	0	0	0	0	0	0	1	0	0	0	1	1.243339254
14/04/2015	Apr	2015	Sentinel	mavimba	13	0	0	0	0	0	0	0	0	0	0	0	0	0	1.243339254
14/04/2015	Apr	2015	Random	mavimba	13	0	0	0	0	0	0	0	0	0	0	0	0	0	1.243339254
14/04/2015	Apr	2015	Random	mavimba	13	0	0	0	0	0	0	0	0	0	0	0	0	0	1.243339254
14/04/2015	Apr	2015	Sentinel	mavimba	13	0	0	0	0	0	0	0	0	0	0	0	0	0	1.243339254
15/04/2015	Apr	2015	Sentinel	kivukoni	1	0	0	0	0	0	0	0	0	0	0	0	0	0	1.243339254
15/04/2015	Apr	2015	Sentinel	kivukoni	1	0	0	0	0	0	0	0	0	0	0	0	0	0	1.243339254
15/04/2015	Apr	2015	Random	kivukoni	1	0	0	0	0	0	0	0	0	0	0	0	0	0	1.243339254
15/04/2015	Apr	2015	Sentinel	kivukoni	1	0	0	0	0	0	0	0	0	0	0	0	0	0	1.243339254
15/04/2015	Apr	2015	Random	kivukoni	1	0	0	0	0	0	0	0	0	0	0	0	0	0	1.243339254
15/04/2015	Apr	2015	Random	kivukoni	1	0	0	1	0	0	1	0	0	0	1	0	0	1	1.243339254
16/04/2015	Apr	2015	Sentinel	minepa	11	0	0	0	0	0	0	0	0	0	0	0	0	0	1.243339254
16/04/2015	Apr	2015	Random	minepa	11	0	0	0	0	0	0	0	0	0	0	0	0	0	1.243339254
16/04/2015	Apr	2015	Sentinel	minepa	11	0	0	0	0	0	0	0	0	0	0	0	0	0	1.243339254
16/04/2015	Apr	2015	Random	minepa	11	0	0	0	0	0	0	0	0	0	0	0	0	0	1.243339254
16/04/2015	Apr	2015	Random	minepa	11	0	0	0	0	0	0	0	0	0	0	0	0	0	1.243339254
16/04/2015	Apr	2015	Sentinel	minepa	11	0	0	0	0	0	0	0	0	1	0	0	0	1	1.243339254
17/04/2015	Apr	2015	Sentinel	mavimba	16	0	0	0	0	0	0	0	0	0	0	0	0	0	1.243339254
17/04/2015	Apr	2015	Random	mavimba	16	0	0	0	0	0	0	0	0	0	0	0	0	0	1.243339254
17/04/2015	Apr	2015	Sentinel	mavimba	16	0	1	0	0	0	1	0	0	0	0	0	0	0	1.243339254
17/04/2015	Apr	2015	Random	mavimba	16	0	0	0	0	0	0	0	0	0	0	0	0	0	1.243339254
17/04/2015	Apr	2015	Sentinel	mavimba	16	0	0	0	0	0	0	0	0	0	0	0	0	0	1.243339254
17/04/2015	Apr	2015	Random	mavimba	16	0	0	0	0	0	0	0	0	0	0	0	0	0	1.243339254
21/4/205	Apr	2015	Random	minepa	8	0	0	0	0	0	0	0	0	0	0	0	0	0	1.243339254
21/4/205	Apr	2015	Sentinel	minepa	8	0	1	0	0	0	1	0	1	0	0	0	0	0	1.243339254
21/4/205	Apr	2015	Random	minepa	8	0	0	0	0	0	0	0	0	0	0	0	0	0	1.243339254
21/4/205	Apr	2015	Sentinel	minepa	8	0	0	0	0	0	0	0	0	0	0	0	0	0	1.243339254
21/4/205	Apr	2015	Sentinel	minepa	8	0	0	0	0	0	0	0	0	0	0	0	0	0	1.243339254
21/4/205	Apr	2015	Random	minepa	8	1	0	0	0	0	0	0	1	0	0	0	0	0	1.243339254
22/04/2015	Apr	2015	Random	kivukoni	7	0	0	0	0	0	0	0	0	0	0	0	0	0	1.243339254
22/04/2015	Apr	2015	Random	kivukoni	7	0	1	0	0	0	1	0	0	0	0	0	0	0	1.243339254
22/04/2015	Apr	2015	Sentinel	kivukoni	7	0	0	0	0	0	0	0	0	0	0	0	0	0	1.243339254
22/04/2015	Apr	2015	Sentinel	kivukoni	7	0	0	0	0	0	0	0	0	0	0	0	0	0	1.243339254
22/04/2015	Apr	2015	Random	kivukoni	7	0	0	0	0	0	0	0	0	0	0	0	0	0	1.243339254
22/04/2015	Apr	2015	Sentinel	kivukoni	7	0	1	0	0	0	1	0	0	0	0	0	0	0	1.243339254
23/04/2015	Apr	2015	Random	kivukoni	4	0	0	0	0	0	0	0	0	0	0	0	0	0	1.243339254
23/04/2015	Apr	2015	Random	kivukoni	4	0	0	0	0	0	0	0	0	0	0	0	0	0	1.243339254
23/04/2015	Apr	2015	Sentinel	kivukoni	4	0	0	0	0	0	0	0	0	0	0	0	0	0	1.243339254
23/04/2015	Apr	2015	Random	kivukoni	4	0	0	0	0	0	0	0	0	0	0	0	0	0	1.243339254
23/04/2015	Apr	2015	Sentinel	kivukoni	4	0	0	0	0	0	0	0	0	0	0	0	0	0	1.243339254
23/04/2015	Apr	2015	Sentinel	kivukoni	4	0	0	0	0	0	0	0	0	0	0	0	0	0	1.243339254
24/04/2015	Apr	2015	Random	kivukoni	2	0	0	0	0	0	0	0	0	0	0	0	0	0	1.243339254
24/04/2015	Apr	2015	Sentinel	kivukoni	2	0	3	0	0	0	3	0	0	1	0	0	1	2	1.243339254
24/04/2015	Apr	2015	Sentinel	kivukoni	2	0	0	0	0	0	0	0	0	0	0	0	0	0	1.243339254
24/04/2015	Apr	2015	Random	kivukoni	2	0	0	0	0	0	0	0	0	0	0	0	0	0	1.243339254
24/04/2015	Apr	2015	Random	kivukoni	2	0	1	0	0	0	1	0	0	0	0	0	0	0	1.243339254
24/04/2015	Apr	2015	Random	kivukoni	2	0	0	0	0	0	0	0	0	0	0	0	0	0	1.243339254
5/5/2015	May	2015	Random	minepa	11	0	0	0	0	0	0	0.01435132	0	0	0	0	0	0	0.348432056
5/5/2015	May	2015	Sentinel	minepa	11	0	0	0	0	0	0	0.01435132	0	0	0	0	0	0	0.348432056
5/5/2015	May	2015	Random	minepa	11	0	0	0	0	0	0	0.01435132	0	0	0	0	0	0	0.348432056
5/5/2015	May	2015	Random	minepa	11	0	0	0	0	0	0	0.01435132	0	0	0	0	0	0	0.348432056
5/5/2015	May	2015	Sentinel	minepa	11	0	0	0	0	0	0	0.01435132	0	0	0	0	0	0	0.348432056
5/5/2015	May	2015	Sentinel	minepa	11	0	0	0	0	0	0	0.01435132	0	0	0	0	0	0	0.348432056
5/6/2015	May	2015	Random	kivukoni	5	0	0	0	0	0	0	0.01435132	0	0	0	0	0	0	0.348432056
5/6/2015	May	2015	Sentinel	kivukoni	5	0	0	0	0	0	0	0.01435132	0	0	0	0	0	0	0.348432056
5/6/2015	May	2015	Sentinel	kivukoni	5	0	0	0	0	0	0	0.01435132	0	0	0	0	0	0	0.348432056
5/6/2015	May	2015	Random	kivukoni	5	0	0	0	0	0	0	0.01435132	0	0	0	0	0	0	0.348432056
5/6/2015	May	2015	Random	kivukoni	5	0	0	0	0	0	0	0.01435132	0	0	0	0	0	0	0.348432056
5/6/2015	May	2015	Sentinel	kivukoni	5	0	0	0	0	0	0	0.01435132	0	0	0	0	0	0	0.348432056
5/7/2015	May	2015	Random	kivukoni	6	0	0	0	0	0	0	0.01435132	0	0	0	0	0	0	0.348432056
5/7/2015	May	2015	Random	kivukoni	6	0	0	0	0	0	0	0.01435132	0	0	0	0	0	0	0.348432056
5/7/2015	May	2015	Sentinel	kivukoni	6	0	0	0	0	0	0	0.01435132	0	0	0	0	0	0	0.348432056
5/7/2015	May	2015	Sentinel	kivukoni	6	0	0	0	0	0	0	0.01435132	0	0	0	0	0	0	0.348432056
5/7/2015	May	2015	Random	kivukoni	6	0	0	0	0	0	0	0.01435132	0	0	0	0	0	0	0.348432056
5/7/2015	May	2015	Sentinel	kivukoni	6	0	0	0	0	0	0	0.01435132	0	0	0	0	0	0	0.348432056
5/8/2015	May	2015	Sentinel	mavimba	15	0	0	0	0	0	0	0.01435132	0	0	0	0	0	0	0.348432056
5/8/2015	May	2015	Random	mavimba	15	0	0	0	0	0	0	0.01435132	0	0	0	0	0	0	0.348432056
5/8/2015	May	2015	Random	mavimba	15	0	0	0	0	0	0	0.01435132	0	0	0	0	0	0	0.348432056
5/8/2015	May	2015	Sentinel	mavimba	15	0	0	0	0	0	0	0.01435132	0	0	0	0	0	0	0.348432056
5/8/2015	May	2015	Sentinel	mavimba	15	0	0	0	0	0	0	0.01435132	0	0	0	0	0	0	0.348432056
5/8/2015	May	2015	Random	mavimba	15	0	0	0	0	0	0	0.01435132	0	0	0	0	0	0	0.348432056
5/12/2015	May	2015	Random	minepa	12	0	0	0	0	0	0	0.01435132	0	0	0	0	0	0	0.348432056
5/12/2015	May	2015	Sentinel	minepa	12	0	0	0	0	0	0	0.01435132	0	0	0	0	0	0	0.348432056
5/12/2015	May	2015	Sentinel	minepa	12	0	0	0	0	0	0	0.01435132	0	0	0	0	0	0	0.348432056
5/12/2015	May	2015	Random	minepa	12	0	0	0	0	0	0	0.01435132	0	0	0	0	0	0	0.348432056
5/12/2015	May	2015	Sentinel	minepa	12	0	0	0	0	0	0	0.01435132	0	0	0	0	0	0	0.348432056
5/12/2015	May	2015	Random	minepa	12	0	0	0	0	0	0	0.01435132	0	0	0	0	0	0	0.348432056
13/05/2015	May	2015	Random	kivukoni	7	0	0	0	0	0	0	0.01435132	0	0	0	0	0	0	0.348432056
13/05/2015	May	2015	Sentinel	kivukoni	7	0	0	0	0	0	0	0.01435132	0	0	0	0	0	0	0.348432056
13/05/2015	May	2015	Sentinel	kivukoni	7	0	0	0	0	0	0	0.01435132	0	0	0	0	0	0	0.348432056
13/05/2015	May	2015	Random	kivukoni	7	0	0	0	0	0	0	0.01435132	0	0	0	0	0	0	0.348432056
13/05/2015	May	2015	Random	kivukoni	7	0	0	0	0	0	0	0.01435132	0	0	0	0	0	0	0.348432056
13/05/2015	May	2015	Sentinel	kivukoni	7	0	0	0	0	0	0	0.01435132	0	0	0	0	0	0	0.348432056
14/05/2015	May	2015	Sentinel	mavimba	13	0	0	0	0	0	0	0.01435132	0	0	0	0	0	0	0.348432056
14/05/2015	May	2015	Random	mavimba	13	0	0	0	0	0	0	0.01435132	0	0	0	0	0	0	0.348432056
14/05/2015	May	2015	Random	mavimba	13	0	0	0	0	0	0	0.01435132	0	0	0	0	0	0	0.348432056
14/05/2015	May	2015	Sentinel	mavimba	13	0	0	0	0	0	0	0.01435132	0	0	0	0	0	0	0.348432056
14/05/2015	May	2015	Sentinel	mavimba	13	0	0	0	0	0	0	0.01435132	0	0	0	0	0	0	0.348432056
14/05/2015	May	2015	Random	mavimba	13	0	0	0	0	0	0	0.01435132	0	0	0	0	0	0	0.348432056
15/05/2015	May	2015	Random	kivukoni	2	0	0	0	0	0	0	0.01435132	0	0	0	0	0	0	0.348432056
15/05/2015	May	2015	Sentinel	kivukoni	2	0	0	0	0	0	0	0.01435132	0	0	0	0	0	0	0.348432056
15/05/2015	May	2015	Sentinel	kivukoni	2	0	0	0	0	0	0	0.01435132	0	0	0	0	0	0	0.348432056
15/05/2015	May	2015	Sentinel	kivukoni	2	1	0	0	0	0	0	0.01435132	0	0	0	0	0	0	0.348432056
15/05/2015	May	2015	Random	kivukoni	2	0	0	0	0	0	0	0.01435132	0	0	0	0	0	0	0.348432056
15/05/2015	May	2015	Random	kivukoni	2	0	0	0	0	0	0	0.01435132	0	0	0	0	0	0	0.348432056
19/05/2015	May	2015	Sentinel	kivukoni	3	0	0	0	0	0	0	0.01435132	0	0	0	0	0	0	0.348432056
19/05/2015	May	2015	Random	kivukoni	3	0	0	0	0	0	0	0.01435132	0	0	0	0	0	0	0.348432056
19/05/2015	May	2015	Sentinel	kivukoni	3	0	0	0	0	0	0	0.01435132	0	0	0	0	0	0	0.348432056
19/05/2015	May	2015	Random	kivukoni	3	0	0	0	0	0	0	0.01435132	0	0	0	0	0	0	0.348432056
19/05/2015	May	2015	Random	kivukoni	3	0	0	0	0	0	0	0.01435132	0	0	0	0	0	0	0.348432056
19/05/2015	May	2015	Sentinel	kivukoni	3	0	0	0	0	0	0	0.01435132	0	0	0	0	0	0	0.348432056
20/05/2015	May	2015	Sentinel	mavimba	14	0	0	0	0	0	0	0.01435132	0	0	0	0	0	0	0.348432056
20/05/2015	May	2015	Random	mavimba	14	0	0	0	0	0	0	0.01435132	0	0	0	0	0	0	0.348432056
20/05/2015	May	2015	Sentinel	mavimba	14	0	0	0	0	0	0	0.01435132	0	0	0	0	0	0	0.348432056
20/05/2015	May	2015	Random	mavimba	14	0	0	0	0	0	0	0.01435132	0	0	0	0	0	0	0.348432056
20/05/2015	May	2015	Sentinel	mavimba	14	1	0	0	0	0	0	0.01435132	1	1	0	0	0	1	0.348432056
20/05/2015	May	2015	Random	mavimba	14	0	0	0	0	0	0	0.01435132	0	0	0	0	0	0	0.348432056
21/05/2015	May	2015	Random	mavimba	16	0	0	0	0	0	0	0.01435132	0	0	0	0	0	0	0.348432056
21/05/2015	May	2015	Sentinel	mavimba	16	0	0	0	0	0	0	0.01435132	0	0	0	0	0	0	0.348432056
21/05/2015	May	2015	Random	mavimba	16	0	0	0	0	0	0	0.01435132	0	0	0	0	0	0	0.348432056
21/05/2015	May	2015	Sentinel	mavimba	16	0	0	0	0	0	0	0.01435132	0	0	0	0	0	0	0.348432056
21/05/2015	May	2015	Random	mavimba	16	0	0	0	0	0	0	0.01435132	0	0	0	0	0	0	0.348432056
21/05/2015	May	2015	Sentinel	mavimba	16	0	0	0	0	0	0	0.01435132	0	0	0	0	0	0	0.348432056
22/05/2015	May	2015	Random	kivukoni	4	0	0	0	0	0	0	0.01435132	0	0	0	0	0	0	0.348432056
22/05/2015	May	2015	Sentinel	kivukoni	4	0	0	0	0	0	0	0.01435132	0	0	0	0	0	0	0.348432056
22/05/2015	May	2015	Random	kivukoni	4	0	0	0	0	0	0	0.01435132	0	0	0	0	0	0	0.348432056
22/05/2015	May	2015	Random	kivukoni	4	0	0	0	0	0	0	0.01435132	0	0	0	0	0	0	0.348432056
22/05/2015	May	2015	Sentinel	kivukoni	4	0	0	0	0	0	0	0.01435132	0	0	0	0	0	0	0.348432056
22/05/2015	May	2015	Sentinel	kivukoni	4	0	0	0	0	0	0	0.01435132	0	0	0	0	0	0	0.348432056
26/05/2015	May	2015	Random	kivukoni	1	0	0	0	0	0	0	0.01435132	0	0	0	0	0	0	0.348432056
26/05/2015	May	2015	Sentinel	kivukoni	1	0	0	0	0	0	0	0.01435132	0	0	0	0	0	0	0.348432056
26/05/2015	May	2015	Random	kivukoni	1	0	0	0	0	0	0	0.01435132	0	0	0	0	0	0	0.348432056
26/05/2015	May	2015	Random	kivukoni	1	0	1	0	0	0	1	0.01435132	0	0	0	0	0	0	0.348432056
26/05/2015	May	2015	Sentinel	kivukoni	1	0	0	0	0	0	0	0.01435132	0	0	2	0	0	2	0.348432056
26/05/2015	May	2015	Sentinel	kivukoni	1	0	0	0	0	0	0	0.01435132	0	0	0	0	0	0	0.348432056
27/05/2015	May	2015	Sentinel	minepa	10	0	0	0	0	0	0	0.01435132	0	0	0	0	0	0	0.348432056
27/05/2015	May	2015	Random	minepa	10	0	0	0	0	0	0	0.01435132	0	0	0	0	0	0	0.348432056
27/05/2015	May	2015	Random	minepa	10	0	0	0	0	0	0	0.01435132	0	0	0	0	0	0	0.348432056
27/05/2015	May	2015	Sentinel	minepa	10	0	1	0	0	0	1	0.01435132	0	1	0	0	0	1	0.348432056
27/05/2015	May	2015	Random	minepa	10	0	0	0	0	0	0	0.01435132	0	0	0	0	0	0	0.348432056
27/05/2015	May	2015	Sentinel	minepa	10	0	0	1	0	0	1	0.01435132	0	0	0	0	0	0	0.348432056
28/05/2015	May	2015	Sentinel	minepa	9	0	0	0	0	0	0	0.01435132	0	0	0	0	0	0	0.348432056
28/05/2015	May	2015	Random	minepa	9	0	0	0	0	0	0	0.01435132	0	0	0	0	0	0	0.348432056
28/05/2015	May	2015	Random	minepa	9	0	0	0	0	0	0	0.01435132	0	0	0	0	0	0	0.348432056
28/05/2015	May	2015	Sentinel	minepa	9	0	0	0	0	0	0	0.01435132	0	0	0	0	0	0	0.348432056
28/05/2015	May	2015	Sentinel	minepa	9	0	0	0	0	0	0	0.01435132	0	0	0	0	0	0	0.348432056
28/05/2015	May	2015	Random	minepa	9	0	0	0	0	0	0	0.01435132	0	0	0	0	0	0	0.348432056
29/05/2015	May	2015	Random	minepa	8	0	0	0	0	0	0	0.01435132	0	0	0	0	0	0	0.348432056
29/05/2015	May	2015	Sentinel	minepa	8	0	0	0	0	0	0	0.01435132	0	0	0	0	0	0	0.348432056
29/05/2015	May	2015	Sentinel	minepa	8	0	0	0	0	0	0	0.01435132	0	0	0	0	0	0	0.348432056
29/05/2015	May	2015	Random	minepa	8	0	0	0	0	0	0	0.01435132	0	1	0	0	0	1	0.348432056
29/05/2015	May	2015	Random	minepa	8	0	0	1	0	0	1	0.01435132	0	2	0	0	0	2	0.348432056
29/05/2015	May	2015	Sentinel	minepa	8	0	0	0	0	0	0	0.01435132	0	2	1	0	0	3	0.348432056
6/2/2015	Jun	2015	Random	minepa	8	0	0	0	0	0	0	0	0	0	0	0	0	0	0.455062571
6/2/2015	Jun	2015	Sentinel	minepa	8	0	0	0	0	0	0	0	0	0	0	0	0	0	0.455062571
6/2/2015	Jun	2015	Random	minepa	8	0	1	0	0	0	1	0	0	2	0	0	0	2	0.455062571
6/2/2015	Jun	2015	Sentinel	minepa	8	0	0	0	0	0	0	0	0	0	0	0	0	0	0.455062571
6/2/2015	Jun	2015	Sentinel	minepa	8	0	0	0	0	0	0	0	0	0	0	0	0	0	0.455062571
6/2/2015	Jun	2015	Random	minepa	8	0	1	1	0	0	2	0	0	0	0	0	0	0	0.455062571
6/3/2015	Jun	2015	Sentinel	kivukoni	6	0	0	0	0	0	0	0	0	0	0	0	0	0	0.455062571
6/3/2015	Jun	2015	Random	kivukoni	6	0	0	0	0	0	0	0	0	0	0	0	0	0	0.455062571
6/3/2015	Jun	2015	Random	kivukoni	6	0	1	0	0	0	1	0	0	0	0	0	0	0	0.455062571
6/3/2015	Jun	2015	Sentinel	kivukoni	6	0	0	0	0	0	0	0	1	0	0	0	0	0	0.455062571
6/3/2015	Jun	2015	Random	kivukoni	6	0	1	1	0	0	2	0	0	1	0	0	0	1	0.455062571
6/3/2015	Jun	2015	Sentinel	kivukoni	6	0	0	0	0	0	0	0	0	0	0	0	0	0	0.455062571
6/4/2015	Jun	2015	Random	kivukoni	1	0	0	0	0	0	0	0	0	0	0	0	0	0	0.455062571
6/4/2015	Jun	2015	Sentinel	kivukoni	1	0	0	0	0	0	0	0	0	0	0	0	0	0	0.455062571
6/4/2015	Jun	2015	Random	kivukoni	1	0	0	0	0	0	0	0	0	0	0	0	0	0	0.455062571
6/4/2015	Jun	2015	Sentinel	kivukoni	1	0	0	0	0	0	0	0	0	0	0	0	0	0	0.455062571
6/4/2015	Jun	2015	Random	kivukoni	1	0	0	0	0	0	0	0	0	0	0	0	0	0	0.455062571
6/4/2015	Jun	2015	Sentinel	kivukoni	1	0	0	0	0	0	0	0	0	0	0	0	0	0	0.455062571
6/5/2015	Jun	2015	Random	mavimba	16	0	0	0	0	0	0	0	0	0	0	0	0	0	0.455062571
6/5/2015	Jun	2015	Sentinel	mavimba	16	0	0	0	0	0	0	0	0	0	0	0	0	0	0.455062571
6/5/2015	Jun	2015	Random	mavimba	16	0	0	0	0	0	0	0	0	0	0	0	0	0	0.455062571
6/5/2015	Jun	2015	Random	mavimba	16	0	0	0	0	0	0	0	0	0	0	0	0	0	0.455062571
6/5/2015	Jun	2015	Sentinel	mavimba	16	0	0	0	0	0	0	0	0	0	0	0	0	0	0.455062571
6/5/2015	Jun	2015	Sentinel	mavimba	16	0	0	0	0	0	0	0	0	0	0	0	0	0	0.455062571
6/9/2015	Jun	2015	Random	kivukoni	3	0	0	0	0	0	0	0	0	0	0	0	0	0	0.455062571
6/9/2015	Jun	2015	Sentinel	kivukoni	3	0	0	0	0	0	0	0	0	0	0	0	0	0	0.455062571
6/9/2015	Jun	2015	Sentinel	kivukoni	3	0	0	0	0	0	0	0	0	0	0	0	0	0	0.455062571
6/9/2015	Jun	2015	Sentinel	kivukoni	3	0	0	0	0	0	0	0	0	0	0	0	0	0	0.455062571
6/9/2015	Jun	2015	Random	kivukoni	3	0	0	0	0	0	0	0	0	0	0	0	0	0	0.455062571
6/9/2015	Jun	2015	Random	kivukoni	3	0	0	0	0	0	0	0	0	0	0	0	0	0	0.455062571
6/10/2015	Jun	2015	Sentinel	minepa	12	0	2	0	0	0	2	0	0	0	0	0	0	0	0.455062571
6/10/2015	Jun	2015	Sentinel	minepa	12	0	0	0	0	0	0	0	0	0	0	0	0	0	0.455062571
6/10/2015	Jun	2015	Sentinel	minepa	12	0	0	0	0	0	0	0	0	0	0	0	0	0	0.455062571
6/10/2015	Jun	2015	Random	minepa	12	0	0	0	0	0	0	0	0	0	0	0	0	0	0.455062571
6/10/2015	Jun	2015	Random	minepa	12	0	0	0	0	0	0	0	0	0	0	0	0	0	0.455062571
6/10/2015	Jun	2015	Random	minepa	12	0	0	0	0	0	0	0	0	0	0	0	0	0	0.455062571
6/11/2015	Jun	2015	Sentinel	kivukoni	2	0	0	0	0	0	0	0	0	0	0	0	0	0	0.455062571
6/11/2015	Jun	2015	Random	kivukoni	2	0	0	0	0	0	0	0	0	0	0	0	0	0	0.455062571
6/11/2015	Jun	2015	Sentinel	kivukoni	2	0	0	0	0	0	0	0	0	0	0	0	0	0	0.455062571
6/11/2015	Jun	2015	Sentinel	kivukoni	2	0	0	0	0	0	0	0	0	0	0	0	0	0	0.455062571
6/11/2015	Jun	2015	Random	kivukoni	2	0	4	1	0	0	5	0	0	1	0	0	0	1	0.455062571
6/11/2015	Jun	2015	Random	kivukoni	2	0	2	0	0	0	2	0	0	0	0	0	0	0	0.455062571
6/12/2015	Jun	2015	Sentinel	mavimba	14	0	0	0	0	0	0	0	0	0	0	0	0	0	0.455062571
6/12/2015	Jun	2015	Random	mavimba	14	0	0	0	0	0	0	0	0	0	0	0	0	0	0.455062571
6/12/2015	Jun	2015	Sentinel	mavimba	14	0	0	0	0	0	0	0	0	0	0	0	0	0	0.455062571
6/12/2015	Jun	2015	Random	mavimba	14	0	0	0	0	0	0	0	0	0	0	0	0	0	0.455062571
6/12/2015	Jun	2015	Random	mavimba	14	0	0	0	0	0	0	0	0	0	0	0	0	0	0.455062571
6/12/2015	Jun	2015	Sentinel	mavimba	14	0	0	0	0	0	0	0	0	0	0	0	0	0	0.455062571
16/06/2015	Jun	2015	Random	kivukoni	5	0	0	0	0	0	0	0	0	0	0	0	0	0	0.455062571
16/06/2015	Jun	2015	Sentinel	kivukoni	5	0	0	0	0	0	0	0	0	0	0	0	0	0	0.455062571
16/06/2015	Jun	2015	Sentinel	kivukoni	5	0	0	0	0	0	0	0	0	0	0	0	0	0	0.455062571
16/06/2015	Jun	2015	Sentinel	kivukoni	5	0	0	0	0	0	0	0	0	0	0	0	0	0	0.455062571
16/06/2015	Jun	2015	Random	kivukoni	5	0	0	0	0	0	0	0	0	0	0	0	0	0	0.455062571
16/06/2015	Jun	2015	Random	kivukoni	5	0	0	0	0	0	0	0	0	0	0	0	0	0	0.455062571
17/06/2015	Jun	2015	Sentinel	minepa	9	0	0	0	0	0	0	0	0	0	0	0	0	0	0.455062571
17/06/2015	Jun	2015	Sentinel	minepa	9	0	0	0	0	0	0	0	0	0	0	0	0	0	0.455062571
17/06/2015	Jun	2015	Random	minepa	9	0	0	0	0	0	0	0	0	1	0	0	0	1	0.455062571
17/06/2015	Jun	2015	Sentinel	minepa	9	0	1	1	0	0	2	0	0	0	0	0	0	0	0.455062571
17/06/2015	Jun	2015	Random	minepa	9	0	0	1	0	0	1	0	0	0	0	0	0	0	0.455062571
17/06/2015	Jun	2015	Random	minepa	9	2	1	0	0	0	1	0	0	0	0	0	0	0	0.455062571
18/06/2015	Jun	2015	Sentinel	kivukoni	4	0	0	0	0	0	0	0	0	0	0	0	0	0	0.455062571
18/06/2015	Jun	2015	Random	kivukoni	4	0	0	0	0	0	0	0	0	0	0	0	0	0	0.455062571
18/06/2015	Jun	2015	Random	kivukoni	4	0	0	0	0	0	0	0	0	0	0	0	0	0	0.455062571
18/06/2015	Jun	2015	Sentinel	kivukoni	4	0	0	0	0	0	0	0	0	0	0	0	0	0	0.455062571
18/06/2015	Jun	2015	Random	kivukoni	4	0	0	0	0	0	0	0	0	0	0	0	0	0	0.455062571
18/06/2015	Jun	2015	Sentinel	kivukoni	4	0	0	0	0	0	0	0	0	0	0	0	0	0	0.455062571
19/06/2015	Jun	2015	Sentinel	minepa	10	0	0	0	0	0	0	0	0	1	0	0	0	1	0.455062571
19/06/2015	Jun	2015	Sentinel	minepa	10	0	0	0	0	0	0	0	0	0	0	0	0	0	0.455062571
19/06/2015	Jun	2015	Random	minepa	10	2	0	0	0	0	0	0	0	0	0	0	0	0	0.455062571
19/06/2015	Jun	2015	Sentinel	minepa	10	0	0	0	0	0	0	0	0	1	0	0	0	1	0.455062571
19/06/2015	Jun	2015	Random	minepa	10	0	0	0	0	0	0	0	0	0	0	0	0	0	0.455062571
19/06/2015	Jun	2015	Random	minepa	10	0	1	0	0	0	1	0	0	0	1	0	1	2	0.455062571
23/06/2015	Jun	2015	Sentinel	mavimba	15	0	0	0	0	0	0	0	0	0	0	0	0	0	0.455062571
23/06/2015	Jun	2015	Sentinel	mavimba	15	0	0	0	0	0	0	0	0	0	0	0	0	0	0.455062571
23/06/2015	Jun	2015	Random	mavimba	15	0	0	0	0	0	0	0	0	0	0	0	0	0	0.455062571
23/06/2015	Jun	2015	Random	mavimba	15	0	0	0	0	0	0	0	0	0	0	0	0	0	0.455062571
23/06/2015	Jun	2015	Random	mavimba	15	0	0	0	0	0	0	0	0	0	0	0	0	0	0.455062571
23/06/2015	Jun	2015	Sentinel	mavimba	15	0	0	0	0	0	0	0	0	0	0	0	0	0	0.455062571
24/06/2015	Jun	2015	Sentinel	minepa	11	0	0	0	0	0	0	0	0	0	0	0	0	0	0.455062571
24/06/2015	Jun	2015	Sentinel	minepa	11	0	0	0	0	0	0	0	0	0	0	0	0	0	0.455062571
24/06/2015	Jun	2015	Random	minepa	11	0	0	0	0	0	0	0	0	0	0	0	0	0	0.455062571
24/06/2015	Jun	2015	Random	minepa	11	0	0	0	0	0	0	0	0	0	0	0	0	0	0.455062571
24/06/2015	Jun	2015	Sentinel	minepa	11	0	0	0	0	0	0	0	0	0	0	0	0	0	0.455062571
24/06/2015	Jun	2015	Random	minepa	11	0	0	0	0	0	0	0	0	0	0	0	0	0	0.455062571
25/06/2015	Jun	2015	Sentinel	mavimba	13	0	0	0	0	0	0	0	0	0	0	0	0	0	0.455062571
25/06/2015	Jun	2015	Random	mavimba	13	0	0	0	0	0	0	0	0	0	0	0	0	0	0.455062571
25/06/2015	Jun	2015	Sentinel	mavimba	13	0	0	0	0	0	0	0	0	0	0	0	0	0	0.455062571
25/06/2015	Jun	2015	Random	mavimba	13	0	0	0	0	0	0	0	0	0	0	0	0	0	0.455062571
25/06/2015	Jun	2015	Sentinel	mavimba	13	0	0	0	0	0	0	0	0	0	0	0	0	0	0.455062571
25/06/2015	Jun	2015	Random	mavimba	13	0	0	0	0	0	0	0	0	0	0	0	0	0	0.455062571
26/06/2015	Jun	2015	Sentinel	kivukoni	7	0	1	0	0	0	1	0	0	0	0	0	0	0	0.455062571
26/06/2015	Jun	2015	Random	kivukoni	7	0	0	0	0	0	0	0	1	0	0	0	0	0	0.455062571
26/06/2015	Jun	2015	Sentinel	kivukoni	7	0	0	0	0	0	0	0	0	0	0	0	0	0	0.455062571
26/06/2015	Jun	2015	Random	kivukoni	7	0	0	0	0	0	0	0	0	0	0	0	0	0	0.455062571
26/06/2015	Jun	2015	Sentinel	kivukoni	7	0	0	0	0	0	0	0	0	0	0	0	0	0	0.455062571
26/06/2015	Jun	2015	Random	kivukoni	7	0	0	0	0	0	0	0	0	0	0	0	0	0	0.455062571
7/7/2015	Jul	2015	Sentinel	minepa	11	0	0	0	0	0	0	0	0	0	0	0	0	0	0.408997955
7/7/2015	Jul	2015	Random	minepa	11	0	0	0	0	0	0	0	0	0	0	0	0	0	0.408997955
7/7/2015	Jul	2015	Sentinel	minepa	11	0	0	0	0	0	0	0	0	0	0	0	0	0	0.408997955
7/7/2015	Jul	2015	Random	minepa	11	0	0	0	0	0	0	0	0	0	0	0	0	0	0.408997955
7/7/2015	Jul	2015	Random	minepa	11	0	0	0	0	0	0	0	0	0	0	0	0	0	0.408997955
7/7/2015	Jul	2015	Sentinel	minepa	11	0	0	0	0	0	0	0	0	0	0	0	0	0	0.408997955
7/8/2015	Jul	2015	Sentinel	mavimba	16	0	0	0	0	0	0	0	0	0	0	0	0	0	0.408997955
7/8/2015	Jul	2015	Sentinel	mavimba	16	0	0	0	0	0	0	0	0	0	0	0	0	0	0.408997955
7/8/2015	Jul	2015	Sentinel	mavimba	16	0	0	0	0	0	0	0	0	0	0	0	0	0	0.408997955
7/8/2015	Jul	2015	Random	mavimba	16	0	0	0	0	0	0	0	0	0	0	0	0	0	0.408997955
7/8/2015	Jul	2015	Random	mavimba	16	0	0	0	0	0	0	0	0	0	0	0	0	0	0.408997955
7/8/2015	Jul	2015	Random	mavimba	16	0	0	0	0	0	0	0	0	0	0	0	0	0	0.408997955
7/9/2015	Jul	2015	Sentinel	kivukoni	1	0	0	0	0	0	0	0	0	0	0	0	0	0	0.408997955
7/9/2015	Jul	2015	Random	kivukoni	1	0	0	0	0	0	0	0	0	0	0	0	0	0	0.408997955
7/9/2015	Jul	2015	Sentinel	kivukoni	1	0	0	0	0	0	0	0	0	0	0	0	0	0	0.408997955
7/9/2015	Jul	2015	Random	kivukoni	1	0	0	0	0	0	0	0	0	0	0	0	0	0	0.408997955
7/9/2015	Jul	2015	Random	kivukoni	1	0	0	0	0	0	0	0	0	0	0	0	0	0	0.408997955
7/9/2015	Jul	2015	Sentinel	kivukoni	1	0	0	0	0	0	0	0	0	0	0	0	0	0	0.408997955
7/10/2015	Jul	2015	Random	mavimba	14	0	0	0	0	0	0	0	0	0	0	0	0	0	0.408997955
7/10/2015	Jul	2015	Sentinel	mavimba	14	0	0	0	0	0	0	0	0	0	0	0	0	0	0.408997955
7/10/2015	Jul	2015	Sentinel	mavimba	14	0	0	0	0	0	0	0	0	0	0	0	0	0	0.408997955
7/10/2015	Jul	2015	Random	mavimba	14	0	0	0	0	0	0	0	0	0	0	0	0	0	0.408997955
7/10/2015	Jul	2015	Random	mavimba	14	0	0	0	0	0	0	0	0	0	0	0	0	0	0.408997955
7/10/2015	Jul	2015	Sentinel	mavimba	14	0	0	0	0	0	0	0	0	0	0	0	0	0	0.408997955
14/07/2015	Jul	2015	Sentinel	kivukoni	3	0	0	0	0	0	0	0	0	0	0	0	0	0	0.408997955
14/07/2015	Jul	2015	Random	kivukoni	3	0	0	0	0	0	0	0	0	0	0	0	0	0	0.408997955
14/07/2015	Jul	2015	Sentinel	kivukoni	3	0	0	0	0	0	0	0	0	0	0	0	0	0	0.408997955
14/07/2015	Jul	2015	Sentinel	kivukoni	3	0	0	0	0	0	0	0	0	0	0	0	0	0	0.408997955
14/07/2015	Jul	2015	Random	kivukoni	3	0	0	0	0	0	0	0	0	0	0	0	0	0	0.408997955
14/07/2015	Jul	2015	Random	kivukoni	3	0	0	0	0	0	0	0	0	0	0	0	0	0	0.408997955
15/07/2015	Jul	2015	Sentinel	kivukoni	5	0	0	0	0	0	0	0	0	0	0	0	0	0	0.408997955
15/07/2015	Jul	2015	Sentinel	kivukoni	5	0	0	0	0	0	0	0	0	0	0	0	0	0	0.408997955
15/07/2015	Jul	2015	Random	kivukoni	5	0	0	0	0	0	0	0	0	0	0	0	0	0	0.408997955
15/07/2015	Jul	2015	Sentinel	kivukoni	5	0	0	0	0	0	0	0	0	0	0	0	0	0	0.408997955
15/07/2015	Jul	2015	Random	kivukoni	5	0	0	0	0	0	0	0	0	0	0	0	0	0	0.408997955
15/07/2015	Jul	2015	Sentinel	kivukoni	5	0	0	0	0	0	0	0	0	0	0	0	0	0	0.408997955
16/07/2015	Jul	2015	Sentinel	kivukoni	4	0	0	0	0	0	0	0	0	0	0	0	0	0	0.408997955
16/07/2015	Jul	2015	Random	kivukoni	4	0	0	0	0	0	0	0	0	0	0	0	0	0	0.408997955
16/07/2015	Jul	2015	Sentinel	kivukoni	4	0	0	0	0	0	0	0	0	0	0	0	0	0	0.408997955
16/07/2015	Jul	2015	Random	kivukoni	4	0	0	0	0	0	0	0	0	0	0	0	0	0	0.408997955
16/07/2015	Jul	2015	Sentinel	kivukoni	4	0	0	0	0	0	0	0	0	0	0	0	0	0	0.408997955
16/07/2015	Jul	2015	Random	kivukoni	4	0	0	0	0	0	0	0	0	0	0	0	0	0	0.408997955
17/07/2015	Jul	2015	Random	kivukoni	6	0	0	0	0	0	0	0	0	0	0	0	0	0	0.408997955
17/07/2015	Jul	2015	Random	kivukoni	6	0	0	0	0	0	0	0	0	0	0	0	0	0	0.408997955
17/07/2015	Jul	2015	Sentinel	kivukoni	6	0	0	0	0	0	0	0	0	0	0	0	0	0	0.408997955
17/07/2015	Jul	2015	Sentinel	kivukoni	6	0	0	0	0	0	0	0	0	0	0	0	0	0	0.408997955
17/07/2015	Jul	2015	Random	kivukoni	6	0	0	0	0	0	0	0	0	0	0	0	0	0	0.408997955
17/07/2015	Jul	2015	Sentinel	kivukoni	6	0	0	0	0	0	0	0	0	0	0	0	0	0	0.408997955
21/07/2015	Jul	2015	Random	kivukoni	7	0	0	0	0	0	0	0	0	0	1	0	0	1	0.408997955
21/07/2015	Jul	2015	Random	kivukoni	7	0	0	0	0	0	0	0	0	0	0	0	0	0	0.408997955
21/07/2015	Jul	2015	Sentinel	kivukoni	7	0	0	0	0	0	0	0	0	0	0	0	0	0	0.408997955
21/07/2015	Jul	2015	Sentinel	kivukoni	7	0	0	0	0	0	0	0	0	0	0	0	0	0	0.408997955
21/07/2015	Jul	2015	Random	kivukoni	7	0	0	0	0	0	0	0	0	0	0	0	0	0	0.408997955
21/07/2015	Jul	2015	Sentinel	kivukoni	7	0	1	0	0	0	1	0	0	0	0	0	0	0	0.408997955
22/07/2015	Jul	2015	Sentinel	minepa	8	0	0	0	0	0	0	0	0	0	0	0	0	0	0.408997955
22/07/2015	Jul	2015	Sentinel	minepa	8	0	0	1	0	0	1	0	0	0	0	0	0	0	0.408997955
22/07/2015	Jul	2015	Random	minepa	8	0	0	0	0	0	0	0	0	0	0	0	0	0	0.408997955
22/07/2015	Jul	2015	Random	minepa	8	0	0	0	0	0	0	0	0	0	0	0	0	0	0.408997955
22/07/2015	Jul	2015	Random	minepa	8	0	0	0	0	0	0	0	0	0	0	0	0	0	0.408997955
22/07/2015	Jul	2015	Random	minepa	8	0	1	0	0	0	1	0	0	0	0	0	0	0	0.408997955
23/07/2015	Jul	2015	Random	minepa	10	0	0	0	0	0	0	0	0	0	0	0	0	0	0.408997955
23/07/2015	Jul	2015	Random	minepa	10	1	2	0	0	0	2	0	0	0	0	0	0	0	0.408997955
23/07/2015	Jul	2015	Random	minepa	10	0	0	0	0	1	1	0	0	0	0	0	0	0	0.408997955
23/07/2015	Jul	2015	Sentinel	minepa	10	3	0	0	0	0	0	0	0	1	0	0	0	1	0.408997955
23/07/2015	Jul	2015	Sentinel	minepa	10	0	0	0	0	0	0	0	0	0	0	0	0	0	0.408997955
23/07/2015	Jul	2015	Sentinel	minepa	10	1	2	0	0	0	2	0	0	0	0	0	0	0	0.408997955
24/07/2015	Jul	2015	Sentinel	mavimba	15	0	0	0	0	0	0	0	0	0	0	0	0	0	0.408997955
24/07/2015	Jul	2015	Sentinel	mavimba	15	0	0	0	0	0	0	0	0	0	0	0	0	0	0.408997955
24/07/2015	Jul	2015	Random	mavimba	15	0	0	0	0	0	0	0	0	0	0	0	0	0	0.408997955
24/07/2015	Jul	2015	Sentinel	mavimba	15	0	0	0	0	0	0	0	0	0	0	0	0	0	0.408997955
24/07/2015	Jul	2015	Random	mavimba	15	0	0	0	0	0	0	0	0	0	0	0	0	0	0.408997955
24/07/2015	Jul	2015	Random	mavimba	15	0	1	0	0	0	1	0	0	0	0	0	0	0	0.408997955
28/07/2015	Jul	2015	Random	mavimba	13	0	0	0	0	0	0	0	0	0	0	0	0	0	0.408997955
28/07/2015	Jul	2015	Random	mavimba	13	0	0	0	0	0	0	0	0	0	0	0	0	0	0.408997955
28/07/2015	Jul	2015	Sentinel	mavimba	13	0	1	0	0	0	1	0	0	1	0	0	0	1	0.408997955
28/07/2015	Jul	2015	Random	mavimba	13	0	0	0	0	0	0	0	0	0	0	0	0	0	0.408997955
28/07/2015	Jul	2015	Sentinel	mavimba	13	0	0	0	0	0	0	0	0	0	0	0	0	0	0.408997955
28/07/2015	Jul	2015	Sentinel	mavimba	13	0	0	0	0	0	0	0	0	0	0	0	0	0	0.408997955
29/07/2015	Jul	2015	Random	kivukoni	2	0	0	0	0	0	0	0	0	0	0	0	0	0	0.408997955
29/07/2015	Jul	2015	Sentinel	kivukoni	2	0	0	0	0	0	0	0	0	0	0	0	0	0	0.408997955
29/07/2015	Jul	2015	Sentinel	kivukoni	2	0	0	0	0	0	0	0	0	0	0	0	0	0	0.408997955
29/07/2015	Jul	2015	Sentinel	kivukoni	2	0	0	0	0	0	0	0	0	0	0	0	0	0	0.408997955
29/07/2015	Jul	2015	Random	kivukoni	2	0	0	0	0	0	0	0	0	0	0	0	0	0	0.408997955
29/07/2015	Jul	2015	Random	kivukoni	2	0	0	0	0	0	0	0	0	0	0	0	0	0	0.408997955
30/07/2015	Jul	2015	Random	minepa	12	0	0	0	0	0	0	0	0	0	1	0	0	1	0.408997955
30/07/2015	Jul	2015	Random	minepa	12	0	0	0	0	0	0	0	0	0	0	0	0	0	0.408997955
30/07/2015	Jul	2015	Random	minepa	12	0	0	0	0	0	0	0	0	0	0	0	0	0	0.408997955
30/07/2015	Jul	2015	Sentinel	minepa	12	0	0	1	0	0	1	0	0	0	0	0	0	0	0.408997955
30/07/2015	Jul	2015	Sentinel	minepa	12	1	0	0	0	0	0	0	0	0	0	0	0	0	0.408997955
30/07/2015	Jul	2015	Sentinel	minepa	12	2	1	0	0	0	1	0	0	0	0	0	0	0	0.408997955
31/07/2015	Jul	2015	Random	minepa	9	0	0	0	0	0	0	0	0	0	0	0	0	0	0.408997955
31/07/2015	Jul	2015	Random	minepa	9	0	0	0	0	0	0	0	0	0	0	0	0	0	0.408997955
31/07/2015	Jul	2015	Sentinel	minepa	9	0	0	0	0	0	0	0	0	0	0	0	0	0	0.408997955
31/07/2015	Jul	2015	Sentinel	minepa	9	0	0	0	0	0	0	0	0	0	0	0	0	0	0.408997955
31/07/2015	Jul	2015	Random	minepa	9	0	0	1	0	0	1	0	0	0	0	0	0	0	0.408997955
31/07/2015	Jul	2015	Sentinel	minepa	9	0	0	0	0	0	0	0	0	0	0	0	0	0	0.408997955
8/11/2015	Aug	2015	Random	minepa	12	0	0	0	0	0	0	0.067658999	0	0	0	0	0	0	0.539083558
8/11/2015	Aug	2015	Sentinel	minepa	12	0	0	0	0	0	0	0.067658999	0	0	0	0	0	0	0.539083558
8/11/2015	Aug	2015	Sentinel	minepa	12	0	0	0	0	0	0	0.067658999	0	0	0	0	0	0	0.539083558
8/11/2015	Aug	2015	Random	minepa	12	0	0	0	0	0	0	0.067658999	0	0	0	0	0	0	0.539083558
8/11/2015	Aug	2015	Random	minepa	12	0	1	0	0	0	1	0.067658999	0	0	0	0	0	0	0.539083558
8/11/2015	Aug	2015	Sentinel	minepa	12	0	0	0	0	0	0	0.067658999	0	0	0	0	0	0	0.539083558
8/12/2015	Aug	2015	Random	minepa	10	0	1	0	0	0	1	0.067658999	0	0	0	0	0	0	0.539083558
8/12/2015	Aug	2015	Random	minepa	10	0	0	0	0	0	0	0.067658999	0	0	0	0	0	0	0.539083558
8/12/2015	Aug	2015	Sentinel	minepa	10	0	1	0	0	0	1	0.067658999	0	0	0	0	0	0	0.539083558
8/12/2015	Aug	2015	Sentinel	minepa	10	0	0	0	0	0	0	0.067658999	0	0	0	0	0	0	0.539083558
8/12/2015	Aug	2015	Sentinel	minepa	10	0	0	0	0	0	0	0.067658999	0	0	0	0	0	0	0.539083558
8/12/2015	Aug	2015	Random	minepa	10	25	17	9	0	0	26	0.067658999	0	0	0	0	0	0	0.539083558
13/08/2015	Aug	2015	Sentinel	kivukoni	4	0	0	0	0	0	0	0.067658999	0	0	0	0	0	0	0.539083558
13/08/2015	Aug	2015	Random	kivukoni	4	0	0	0	0	0	0	0.067658999	0	0	0	0	0	0	0.539083558
13/08/2015	Aug	2015	Random	kivukoni	4	0	0	0	0	0	0	0.067658999	0	0	0	0	0	0	0.539083558
13/08/2015	Aug	2015	Sentinel	kivukoni	4	0	0	0	0	0	0	0.067658999	0	0	0	0	0	0	0.539083558
13/08/2015	Aug	2015	Sentinel	kivukoni	4	0	2	0	0	0	2	0.067658999	0	0	0	0	0	0	0.539083558
13/08/2015	Aug	2015	Random	kivukoni	4	0	0	0	0	0	0	0.067658999	0	0	0	0	0	0	0.539083558
14/08/2015	Aug	2015	Sentinel	mavimba	15	0	0	0	0	0	0	0.067658999	0	0	0	0	0	0	0.539083558
14/08/2015	Aug	2015	Sentinel	mavimba	15	0	0	0	0	0	0	0.067658999	0	0	0	0	0	0	0.539083558
14/08/2015	Aug	2015	Random	mavimba	15	0	0	0	0	0	0	0.067658999	0	0	0	0	0	0	0.539083558
14/08/2015	Aug	2015	Random	mavimba	15	0	0	0	0	0	0	0.067658999	0	0	0	0	0	0	0.539083558
14/08/2015	Aug	2015	Sentinel	mavimba	15	0	0	0	0	0	0	0.067658999	0	0	0	0	0	0	0.539083558
14/08/2015	Aug	2015	Random	mavimba	15	0	0	0	0	0	0	0.067658999	0	0	0	0	0	0	0.539083558
18/08/2015	Aug	2015	Sentinel	minepa	8	0	0	0	0	0	0	0.067658999	0	0	0	0	0	0	0.539083558
18/08/2015	Aug	2015	Random	minepa	8	0	0	0	0	0	0	0.067658999	0	0	0	0	0	0	0.539083558
18/08/2015	Aug	2015	Random	minepa	8	0	0	0	0	0	0	0.067658999	0	0	0	0	0	0	0.539083558
18/08/2015	Aug	2015	Random	minepa	8	0	0	0	0	0	0	0.067658999	0	0	0	0	0	0	0.539083558
18/08/2015	Aug	2015	Sentinel	minepa	8	0	0	0	0	0	0	0.067658999	0	0	0	0	0	0	0.539083558
18/08/2015	Aug	2015	Sentinel	minepa	8	0	0	0	0	0	0	0.067658999	0	0	0	0	0	0	0.539083558
19/08/2015	Aug	2015	Random	kivukoni	5	0	0	0	0	0	0	0.067658999	0	0	0	0	0	0	0.539083558
19/08/2015	Aug	2015	Random	kivukoni	5	0	0	0	0	0	0	0.067658999	0	0	0	0	0	0	0.539083558
19/08/2015	Aug	2015	Random	kivukoni	5	0	0	0	0	0	0	0.067658999	0	0	0	0	0	0	0.539083558
19/08/2015	Aug	2015	Sentinel	kivukoni	5	1	0	0	0	0	0	0.067658999	0	0	0	0	0	0	0.539083558
19/08/2015	Aug	2015	Sentinel	kivukoni	5	0	0	0	0	0	0	0.067658999	0	0	0	0	0	0	0.539083558
19/08/2015	Aug	2015	Sentinel	kivukoni	5	0	0	0	0	0	0	0.067658999	0	0	0	0	0	0	0.539083558
20/08/2015	Aug	2015	Random	mavimba	14	0	0	0	0	0	0	0.067658999	0	0	0	0	0	0	0.539083558
20/08/2015	Aug	2015	Sentinel	mavimba	14	0	0	0	0	0	0	0.067658999	0	0	0	0	0	0	0.539083558
20/08/2015	Aug	2015	Sentinel	mavimba	14	0	0	0	0	0	0	0.067658999	0	0	0	0	0	0	0.539083558
20/08/2015	Aug	2015	Random	mavimba	14	0	0	0	0	0	0	0.067658999	0	0	0	0	0	0	0.539083558
20/08/2015	Aug	2015	Random	mavimba	14	0	0	0	0	0	0	0.067658999	0	0	0	0	0	0	0.539083558
20/08/2015	Aug	2015	Sentinel	mavimba	14	0	0	0	0	0	0	0.067658999	0	0	0	0	0	0	0.539083558
21/08/2015	Aug	2015	Sentinel	kivukoni	3	0	0	0	0	0	0	0.067658999	0	0	0	0	0	0	0.539083558
21/08/2015	Aug	2015	Random	kivukoni	3	0	0	0	0	0	0	0.067658999	0	0	0	0	0	0	0.539083558
21/08/2015	Aug	2015	Random	kivukoni	3	0	0	0	0	0	0	0.067658999	0	0	0	0	0	0	0.539083558
21/08/2015	Aug	2015	Sentinel	kivukoni	3	0	0	0	0	0	0	0.067658999	0	0	0	0	0	0	0.539083558
21/08/2015	Aug	2015	Random	kivukoni	3	0	0	0	0	0	0	0.067658999	0	0	0	0	0	0	0.539083558
21/08/2015	Aug	2015	Sentinel	kivukoni	3	0	0	0	0	0	0	0.067658999	0	0	0	0	0	0	0.539083558
25/08/2015	Aug	2015	Sentinel	minepa	11	0	0	0	0	0	0	0.067658999	0	0	0	0	0	0	0.539083558
25/08/2015	Aug	2015	Random	minepa	11	0	0	0	0	0	0	0.067658999	0	0	0	0	0	0	0.539083558
25/08/2015	Aug	2015	Sentinel	minepa	11	0	0	0	0	0	0	0.067658999	0	0	0	0	0	0	0.539083558
25/08/2015	Aug	2015	Random	minepa	11	0	0	0	0	0	0	0.067658999	0	0	0	0	0	0	0.539083558
25/08/2015	Aug	2015	Random	minepa	11	0	0	0	0	0	0	0.067658999	0	0	0	0	0	0	0.539083558
25/08/2015	Aug	2015	Sentinel	minepa	11	0	0	0	0	0	0	0.067658999	0	0	0	0	0	0	0.539083558
26/08/2015	Aug	2015	Sentinel	kivukoni	1	0	0	0	0	0	0	0.067658999	0	0	0	0	0	0	0.539083558
26/08/2015	Aug	2015	Sentinel	kivukoni	1	0	0	0	0	0	0	0.067658999	0	0	0	0	0	0	0.539083558
26/08/2015	Aug	2015	Sentinel	kivukoni	1	0	0	0	0	0	0	0.067658999	0	0	0	0	0	0	0.539083558
26/08/2015	Aug	2015	Random	kivukoni	1	0	0	0	0	0	0	0.067658999	0	0	0	0	0	0	0.539083558
26/08/2015	Aug	2015	Random	kivukoni	1	0	0	0	0	0	0	0.067658999	0	0	0	0	0	0	0.539083558
26/08/2015	Aug	2015	Random	kivukoni	1	0	0	0	0	0	0	0.067658999	0	0	0	0	0	0	0.539083558
27/08/2015	Aug	2015	Sentinel	kivukoni	6	0	0	0	0	0	0	0.067658999	0	0	0	0	0	0	0.539083558
27/08/2015	Aug	2015	Random	kivukoni	6	0	0	0	0	0	0	0.067658999	0	0	0	0	0	0	0.539083558
27/08/2015	Aug	2015	Random	kivukoni	6	0	0	0	0	0	0	0.067658999	0	0	0	0	0	0	0.539083558
27/08/2015	Aug	2015	Sentinel	kivukoni	6	0	0	0	0	0	0	0.067658999	0	0	0	0	0	0	0.539083558
27/08/2015	Aug	2015	Sentinel	kivukoni	6	0	0	0	0	0	0	0.067658999	0	0	0	0	0	0	0.539083558
27/08/2015	Aug	2015	Random	kivukoni	6	0	0	0	0	0	0	0.067658999	0	0	0	0	0	0	0.539083558
28/08/2015	Aug	2015	Sentinel	minepa	9	0	0	0	0	0	0	0.067658999	0	0	0	0	0	0	0.539083558
28/08/2015	Aug	2015	Random	minepa	9	0	0	0	0	0	0	0.067658999	0	0	0	0	0	0	0.539083558
28/08/2015	Aug	2015	Sentinel	minepa	9	0	0	0	0	0	0	0.067658999	0	0	0	0	0	0	0.539083558
28/08/2015	Aug	2015	Sentinel	minepa	9	0	0	0	0	0	0	0.067658999	0	0	0	0	0	0	0.539083558
28/08/2015	Aug	2015	Random	minepa	9	0	0	0	0	0	0	0.067658999	0	0	0	0	0	0	0.539083558
28/08/2015	Aug	2015	Random	minepa	9	0	0	0	0	0	0	0.067658999	0	0	0	0	0	0	0.539083558
9/1/2015	Aug	2015	Random	mavimba	16	0	0	0	0	0	0	0.067658999	0	0	0	0	0	0	0.539083558
9/1/2015	Aug	2015	Random	mavimba	16	0	0	0	0	0	0	0.067658999	0	0	0	0	0	0	0.539083558
9/1/2015	Aug	2015	Sentinel	mavimba	16	0	0	0	0	0	0	0.067658999	0	0	0	0	0	0	0.539083558
9/1/2015	Aug	2015	Sentinel	mavimba	16	0	0	0	0	0	0	0.067658999	0	0	0	0	0	0	0.539083558
9/1/2015	Aug	2015	Sentinel	mavimba	16	0	0	0	0	0	0	0.067658999	0	0	0	0	0	0	0.539083558
9/1/2015	Aug	2015	Random	mavimba	16	0	0	0	0	0	0	0.067658999	0	0	0	0	0	0	0.539083558
9/2/2015	Aug	2015	Sentinel	kivukoni	2	0	0	0	0	0	0	0.067658999	0	0	0	0	0	0	0.539083558
9/2/2015	Aug	2015	Sentinel	kivukoni	2	0	0	0	0	0	0	0.067658999	0	0	0	0	0	0	0.539083558
9/2/2015	Aug	2015	Random	kivukoni	2	0	0	0	0	0	0	0.067658999	0	0	0	0	0	0	0.539083558
9/2/2015	Aug	2015	Random	kivukoni	2	0	0	0	0	0	0	0.067658999	0	0	0	0	0	0	0.539083558
9/2/2015	Aug	2015	Sentinel	kivukoni	2	0	0	0	0	0	0	0.067658999	0	0	0	0	0	0	0.539083558
9/2/2015	Aug	2015	Random	kivukoni	2	0	0	0	0	0	0	0.067658999	0	0	0	0	0	0	0.539083558
9/3/2015	Aug	2015	Sentinel	mavimba	13	0	0	0	0	0	0	0.067658999	0	0	0	0	0	0	0.539083558
9/3/2015	Aug	2015	Random	mavimba	13	0	0	0	0	0	0	0.067658999	0	0	0	0	0	0	0.539083558
9/3/2015	Aug	2015	Random	mavimba	13	0	0	0	0	0	0	0.067658999	0	0	0	0	0	0	0.539083558
9/3/2015	Aug	2015	Sentinel	mavimba	13	0	0	0	0	0	0	0.067658999	0	0	0	0	0	0	0.539083558
9/3/2015	Aug	2015	Sentinel	mavimba	13	0	0	0	0	0	0	0.067658999	0	0	0	0	0	0	0.539083558
9/3/2015	Aug	2015	Random	mavimba	13	0	0	0	0	0	0	0.067658999	0	0	0	0	0	0	0.539083558
9/4/2015	Aug	2015	Sentinel	kivukoni	7	0	0	0	0	0	0	0.067658999	0	0	0	0	0	0	0.539083558
9/4/2015	Aug	2015	Sentinel	kivukoni	7	0	0	0	0	0	0	0.067658999	0	0	0	0	0	0	0.539083558
9/4/2015	Aug	2015	Sentinel	kivukoni	7	0	0	0	0	1	1	0.067658999	0	0	0	0	0	0	0.539083558
9/4/2015	Aug	2015	Random	kivukoni	7	0	0	0	0	0	0	0.067658999	0	0	0	0	0	0	0.539083558
9/4/2015	Aug	2015	Random	kivukoni	7	0	0	0	0	0	0	0.067658999	0	0	0	0	0	0	0.539083558
9/4/2015	Aug	2015	Random	kivukoni	7	0	0	0	0	0	0	0.067658999	0	0	0	0	0	0	0.539083558
9/8/2015	Sept	2015	Sentinel	minepa	11	0	0	0	0	0	0	0	0	0	0	0	0	0	0
9/8/2015	Sept	2015	Sentinel	minepa	11	0	0	0	0	0	0	0	0	0	0	0	0	0	0
9/8/2015	Sept	2015	Random	minepa	11	0	0	0	0	0	0	0	0	0	0	0	0	0	0
9/8/2015	Sept	2015	Random	minepa	11	0	0	0	0	0	0	0	0	0	0	0	0	0	0
9/8/2015	Sept	2015	Random	minepa	11	0	0	0	0	0	0	0	0	0	0	0	0	0	0
9/8/2015	Sept	2015	Sentinel	minepa	11	0	0	0	0	0	0	0	0	0	0	0	0	0	0
9/9/2015	Sept	2015	Random	kivukoni	4	0	0	0	0	0	0	0	0	0	0	0	0	0	0
9/9/2015	Sept	2015	Random	kivukoni	4	0	0	0	0	0	0	0	0	0	0	0	0	0	0
9/9/2015	Sept	2015	Sentinel	kivukoni	4	0	0	0	0	0	0	0	0	0	0	0	0	0	0
9/9/2015	Sept	2015	Random	kivukoni	4	0	0	0	0	0	0	0	0	0	0	0	0	0	0
9/9/2015	Sept	2015	Sentinel	kivukoni	4	0	0	0	0	0	0	0	0	0	0	0	0	0	0
9/9/2015	Sept	2015	Sentinel	kivukoni	4	0	0	0	0	0	0	0	0	0	0	0	0	0	0
9/10/2015	Sept	2015	Sentinel	kivukoni	5	0	0	0	0	0	0	0	0	0	0	0	0	0	0
9/10/2015	Sept	2015	Random	kivukoni	5	0	0	0	0	0	0	0	0	0	0	0	0	0	0
9/10/2015	Sept	2015	Sentinel	kivukoni	5	0	0	0	0	0	0	0	0	0	0	0	0	0	0
9/10/2015	Sept	2015	Sentinel	kivukoni	5	0	0	0	0	0	0	0	0	0	0	0	0	0	0
9/10/2015	Sept	2015	Random	kivukoni	5	0	0	0	0	0	0	0	0	0	0	0	0	0	0
9/10/2015	Sept	2015	Random	kivukoni	5	0	0	0	0	0	0	0	0	0	0	0	0	0	0
9/11/2015	Sept	2015	Sentinel	mavimba	15	0	0	0	0	0	0	0	0	0	0	0	0	0	0
9/11/2015	Sept	2015	Sentinel	mavimba	15	0	0	0	0	0	0	0	0	0	0	0	0	0	0
9/11/2015	Sept	2015	Sentinel	mavimba	15	0	0	0	0	0	0	0	0	0	0	0	0	0	0
9/11/2015	Sept	2015	Random	mavimba	15	0	0	0	0	0	0	0	0	0	0	0	0	0	0
9/11/2015	Sept	2015	Random	mavimba	15	0	0	0	0	0	0	0	0	0	0	0	0	0	0
9/11/2015	Sept	2015	Random	mavimba	15	0	0	0	0	0	0	0	0	0	0	0	0	0	0
15/09/2015	Sept	2015	Random	kivukoni	6	0	0	0	0	0	0	0	0	0	0	0	0	0	0
15/09/2015	Sept	2015	Sentinel	kivukoni	6	0	0	0	0	0	0	0	0	0	0	0	0	0	0
15/09/2015	Sept	2015	Sentinel	kivukoni	6	0	0	0	0	0	0	0	0	0	0	0	0	0	0
15/09/2015	Sept	2015	Sentinel	kivukoni	6	0	0	0	0	0	0	0	0	0	0	0	0	0	0
15/09/2015	Sept	2015	Random	kivukoni	6	0	0	0	0	0	0	0	0	0	0	0	0	0	0
15/09/2015	Sept	2015	Random	kivukoni	6	0	0	0	0	0	0	0	0	0	0	0	0	0	0
16/09/2015	Sept	2015	Random	kivukoni	2	0	0	0	0	0	0	0	0	0	0	0	0	0	0
16/09/2015	Sept	2015	Sentinel	kivukoni	2	0	0	0	0	0	0	0	0	0	0	0	0	0	0
16/09/2015	Sept	2015	Random	kivukoni	2	0	0	0	0	0	0	0	0	0	0	0	0	0	0
16/09/2015	Sept	2015	Sentinel	kivukoni	2	0	0	0	0	0	0	0	0	0	0	0	0	0	0
16/09/2015	Sept	2015	Sentinel	kivukoni	2	0	0	0	0	0	0	0	0	0	0	0	0	0	0
16/09/2015	Sept	2015	Random	kivukoni	2	0	0	0	0	0	0	0	0	0	0	0	0	0	0
18/09/2015	Sept	2015	Sentinel	mavimba	13	0	0	0	0	0	0	0	0	0	0	0	0	0	0
18/09/2015	Sept	2015	Random	mavimba	13	0	0	0	0	0	0	0	0	0	0	0	0	0	0
18/09/2015	Sept	2015	Random	mavimba	13	0	0	0	0	0	0	0	0	0	0	0	0	0	0
18/09/2015	Sept	2015	Sentinel	mavimba	13	0	0	0	0	0	0	0	0	0	0	0	0	0	0
18/09/2015	Sept	2015	Random	mavimba	13	0	0	0	0	0	0	0	0	0	0	0	0	0	0
18/09/2015	Sept	2015	Sentinel	mavimba	13	0	0	0	0	0	0	0	0	0	0	0	0	0	0
20/09/2015	Sept	2015	Sentinel	kivukoni	3	0	0	0	0	0	0	0	0	0	0	0	0	0	0
20/09/2015	Sept	2015	Sentinel	kivukoni	3	0	0	0	0	0	0	0	0	0	0	0	0	0	0
20/09/2015	Sept	2015	Random	kivukoni	3	0	0	0	0	0	0	0	0	0	0	0	0	0	0
20/09/2015	Sept	2015	Sentinel	kivukoni	3	0	0	0	0	0	0	0	0	0	0	0	0	0	0
20/09/2015	Sept	2015	Random	kivukoni	3	0	0	0	0	0	0	0	0	0	0	0	0	0	0
20/09/2015	Sept	2015	Random	kivukoni	3	0	0	0	0	0	0	0	0	0	0	0	0	0	0
22/09/2015	Sept	2015	Random	minepa	12	0	0	0	0	0	0	0	0	0	0	0	0	0	0
22/09/2015	Sept	2015	Sentinel	minepa	12	0	0	0	0	0	0	0	0	0	0	0	0	0	0
22/09/2015	Sept	2015	Random	minepa	12	0	0	0	0	0	0	0	0	0	0	0	0	0	0
22/09/2015	Sept	2015	Random	minepa	12	0	0	0	0	0	0	0	0	0	0	0	0	0	0
22/09/2015	Sept	2015	Sentinel	minepa	12	0	0	0	0	0	0	0	0	0	0	0	0	0	0
22/09/2015	Sept	2015	Sentinel	minepa	12	0	0	0	0	0	0	0	0	0	0	0	0	0	0
23/09/2015	Sept	2015	Sentinel	mavimba	14	0	0	0	0	0	0	0	0	0	0	0	0	0	0
23/09/2015	Sept	2015	Random	mavimba	14	0	0	0	0	0	0	0	0	0	0	0	0	0	0
23/09/2015	Sept	2015	Sentinel	mavimba	14	0	0	0	0	0	0	0	0	0	0	0	0	0	0
23/09/2015	Sept	2015	Random	mavimba	14	0	0	0	0	0	0	0	0	0	0	0	0	0	0
23/09/2015	Sept	2015	Random	mavimba	14	0	0	0	0	0	0	0	0	0	0	0	0	0	0
23/09/2015	Sept	2015	Sentinel	mavimba	14	0	0	0	0	0	0	0	0	0	0	0	0	0	0
24/09/2015	Sept	2015	Sentinel	minepa	8	0	0	0	0	0	0	0	0	0	0	0	0	0	0
24/09/2015	Sept	2015	Sentinel	minepa	8	0	0	0	0	0	0	0	0	0	0	0	0	0	0
24/09/2015	Sept	2015	Sentinel	minepa	8	0	0	0	0	0	0	0	0	0	0	0	0	0	0
24/09/2015	Sept	2015	Random	minepa	8	0	0	0	0	0	0	0	0	0	0	0	0	0	0
24/09/2015	Sept	2015	Random	minepa	8	0	0	0	0	0	0	0	0	0	0	0	0	0	0
24/09/2015	Sept	2015	Sentinel	minepa	8	0	0	0	0	0	0	0	0	0	0	0	0	0	0
25/09/2015	Sept	2015	Sentinel	mavimba	16	0	0	0	0	0	0	0	0	0	0	0	0	0	0
25/09/2015	Sept	2015	Sentinel	mavimba	16	0	0	0	0	0	0	0	0	0	0	0	0	0	0
25/09/2015	Sept	2015	Random	mavimba	16	0	0	0	0	0	0	0	0	0	0	0	0	0	0
25/09/2015	Sept	2015	Sentinel	mavimba	16	0	0	0	0	0	0	0	0	0	0	0	0	0	0
25/09/2015	Sept	2015	Random	mavimba	16	0	0	0	0	0	0	0	0	0	0	0	0	0	0
25/09/2015	Sept	2015	Sentinel	mavimba	16	0	0	0	0	0	0	0	0	0	0	0	0	0	0
29/09/2015	Sept	2015	Random	minepa	10	0	0	0	0	0	0	0	0	0	0	0	0	0	0
29/09/2015	Sept	2015	Sentinel	minepa	10	0	1	0	0	0	1	0	0	0	0	0	0	0	0
29/09/2015	Sept	2015	Random	minepa	10	0	0	0	0	0	0	0	0	0	0	0	0	0	0
29/09/2015	Sept	2015	Sentinel	minepa	10	0	0	0	0	0	0	0	0	0	0	0	0	0	0
29/09/2015	Sept	2015	Random	minepa	10	0	0	0	0	0	0	0	0	0	0	0	0	0	0
29/09/2015	Sept	2015	Sentinel	minepa	10	0	0	0	0	0	0	0	0	0	0	0	0	0	0
30/09/2015	Sept	2015	Sentinel	kivukoni	1	0	0	0	0	0	0	0	0	0	0	0	0	0	0
30/09/2015	Sept	2015	Sentinel	kivukoni	1	0	0	0	0	0	0	0	0	0	0	0	0	0	0
30/09/2015	Sept	2015	Random	kivukoni	1	0	0	0	0	0	0	0	0	0	0	0	0	0	0
30/09/2015	Sept	2015	Random	kivukoni	1	0	0	0	0	0	0	0	0	0	0	0	0	0	0
30/09/2015	Sept	2015	Random	kivukoni	1	0	0	0	0	0	0	0	0	0	0	0	0	0	0
30/09/2015	Sept	2015	Sentinel	kivukoni	1	0	0	0	0	0	0	0	0	0	0	0	0	0	0
10/1/2015	Oct	2015	Random	minepa	9	0	0	0	0	0	0	0	0	0	0	0	0	0	0
10/1/2015	Oct	2015	Sentinel	minepa	9	0	0	0	0	0	0	0	0	0	0	0	0	0	0
10/1/2015	Oct	2015	Sentinel	minepa	9	0	0	0	0	0	0	0	0	0	0	0	0	0	0
10/1/2015	Oct	2015	Random	minepa	9	0	0	0	0	0	0	0	0	0	0	0	0	0	0
10/1/2015	Oct	2015	Random	minepa	9	0	0	0	0	0	0	0	0	0	0	0	0	0	0
10/1/2015	Oct	2015	Sentinel	minepa	9	0	0	0	0	0	0	0	0	0	0	0	0	0	0
10/2/2015	Oct	2015	Sentinel	kivukoni	7	0	1	1	0	0	2	0	0	1	0	0	0	1	0
10/2/2015	Oct	2015	Random	kivukoni	7	0	8	0	0	0	8	0	0	5	0	0	0	5	0
10/2/2015	Oct	2015	Sentinel	kivukoni	7	0	0	0	0	0	0	0	0	0	0	0	0	0	0
10/2/2015	Oct	2015	Sentinel	kivukoni	7	0	1	2	0	0	3	0	0	0	1	0	0	1	0
10/2/2015	Oct	2015	Sentinel	kivukoni	7	0	0	0	0	0	0	0	0	0	0	0	0	0	0
10/2/2015	Oct	2015	Random	kivukoni	7	0	6	0	0	0	6	0	0	5	0	0	0	5	0
10/6/2015	Oct	2015	Random	kivukoni	4	0	0	0	0	0	0	0	0	0	0	0	0	0	0
10/6/2015	Oct	2015	Random	kivukoni	4	0	0	0	0	0	0	0	0	0	0	0	0	0	0
10/6/2015	Oct	2015	Sentinel	kivukoni	4	0	0	0	0	0	0	0	0	0	0	0	0	0	0
10/6/2015	Oct	2015	Sentinel	kivukoni	4	0	0	0	0	0	0	0	0	0	0	0	0	0	0
10/6/2015	Oct	2015	Random	kivukoni	4	0	0	0	0	0	0	0	0	0	0	0	0	0	0
10/6/2015	Oct	2015	Sentinel	kivukoni	4	0	0	0	0	0	0	0	0	0	0	0	0	0	0
10/7/2015	Oct	2015	Sentinel	minepa	10	0	0	0	0	0	0	0	0	0	0	0	0	0	0
10/7/2015	Oct	2015	Random	minepa	10	0	0	0	0	0	0	0	0	0	0	0	0	0	0
10/7/2015	Oct	2015	Sentinel	minepa	10	0	0	0	0	0	0	0	0	0	0	0	0	0	0
10/7/2015	Oct	2015	Random	minepa	10	0	0	0	0	0	0	0	0	0	0	0	0	0	0
10/7/2015	Oct	2015	Sentinel	minepa	10	0	0	0	0	0	0	0	0	0	0	0	0	0	0
10/7/2015	Oct	2015	Random	minepa	10	0	0	0	0	0	0	0	0	0	0	0	0	0	0
10/8/2015	Oct	2015	Random	minepa	8	0	0	0	0	0	0	0	0	0	0	0	0	0	0
10/8/2015	Oct	2015	Sentinel	minepa	8	0	0	0	0	0	0	0	0	0	0	0	0	0	0
10/8/2015	Oct	2015	Sentinel	minepa	8	0	0	0	0	0	0	0	0	0	0	0	0	0	0
10/8/2015	Oct	2015	Sentinel	minepa	8	0	0	0	0	0	0	0	0	0	0	0	0	0	0
10/8/2015	Oct	2015	Random	minepa	8	0	0	0	0	0	0	0	0	0	0	0	0	0	0
10/8/2015	Oct	2015	Random	minepa	8	0	0	0	0	0	0	0	0	0	0	0	0	0	0
10/9/2015	Oct	2015	Random	mavimba	13	0	0	0	0	0	0	0	0	0	0	0	0	0	0
10/9/2015	Oct	2015	Random	mavimba	13	0	0	0	0	0	0	0	0	0	0	0	0	0	0
10/9/2015	Oct	2015	Sentinel	mavimba	13	0	0	0	0	0	0	0	0	0	0	0	0	0	0
10/9/2015	Oct	2015	Random	mavimba	13	0	0	0	0	0	0	0	0	0	0	0	0	0	0
10/9/2015	Oct	2015	Sentinel	mavimba	13	0	0	0	0	0	0	0	0	0	0	0	0	0	0
10/9/2015	Oct	2015	Sentinel	mavimba	13	0	0	0	0	0	0	0	0	0	0	0	0	0	0
13/10/2015	Oct	2015	Sentinel	kivukoni	5	0	0	0	0	0	0	0	0	0	0	0	0	0	0
13/10/2015	Oct	2015	Random	kivukoni	5	0	0	0	0	0	0	0	0	0	0	0	0	0	0
13/10/2015	Oct	2015	Sentinel	kivukoni	5	0	0	0	0	0	0	0	0	0	0	0	0	0	0
13/10/2015	Oct	2015	Random	kivukoni	5	0	0	0	0	0	0	0	0	0	0	0	0	0	0
13/10/2015	Oct	2015	Random	kivukoni	5	0	0	0	0	0	0	0	0	0	0	0	0	0	0
13/10/2015	Oct	2015	Random	kivukoni	5	0	0	0	0	0	0	0	0	0	0	0	0	0	0
14/10/2015	Oct	2015	Sentinel	minepa	11	0	0	0	0	0	0	0	0	0	0	0	0	0	0
14/10/2015	Oct	2015	Sentinel	minepa	11	0	0	0	0	0	0	0	0	0	0	0	0	0	0
14/10/2015	Oct	2015	Sentinel	minepa	11	0	0	0	0	0	0	0	0	0	0	0	0	0	0
14/10/2015	Oct	2015	Random	minepa	11	0	0	0	0	0	0	0	0	0	0	0	0	0	0
14/10/2015	Oct	2015	Random	minepa	11	0	0	0	0	0	0	0	0	0	0	0	0	0	0
14/10/2015	Oct	2015	Random	minepa	11	0	0	0	0	0	0	0	0	0	0	0	0	0	0
15/10/2015	Oct	2015	Sentinel	minepa	12	0	0	0	0	0	0	0	0	0	0	0	0	0	0
15/10/2015	Oct	2015	Sentinel	minepa	12	1	0	0	0	0	0	0	0	0	0	0	0	0	0
15/10/2015	Oct	2015	Random	minepa	12	0	0	0	0	0	0	0	0	0	0	0	0	0	0
15/10/2015	Oct	2015	Random	minepa	12	0	0	0	0	0	0	0	0	0	0	0	0	0	0
15/10/2015	Oct	2015	Random	minepa	12	0	0	0	0	0	0	0	0	0	0	0	0	0	0
15/10/2015	Oct	2015	Sentinel	minepa	12	0	0	0	0	0	0	0	0	0	0	0	0	0	0
16/10/2015	Oct	2015	Random	minepa	9	0	0	0	0	0	0	0	0	0	0	0	0	0	0
16/10/2015	Oct	2015	Random	minepa	9	0	0	0	0	0	0	0	0	0	0	0	0	0	0
16/10/2015	Oct	2015	Sentinel	minepa	9	0	0	0	0	0	0	0	0	0	0	0	0	0	0
16/10/2015	Oct	2015	Sentinel	minepa	9	0	0	0	0	0	0	0	0	0	0	0	0	0	0
16/10/2015	Oct	2015	Random	minepa	9	0	0	0	0	0	0	0	0	0	0	0	0	0	0
16/10/2015	Oct	2015	Sentinel	minepa	9	0	0	0	0	0	0	0	0	0	0	0	0	0	0
20/10/2015	Oct	2015	Sentinel	kivukoni	1	0	0	0	0	0	0	0	0	0	0	0	0	0	0
20/10/2015	Oct	2015	Random	kivukoni	1	0	0	0	0	0	0	0	0	0	0	0	0	0	0
20/10/2015	Oct	2015	Random	kivukoni	1	0	0	0	0	0	0	0	0	0	0	0	0	0	0
20/10/2015	Oct	2015	Sentinel	kivukoni	1	0	0	0	0	0	0	0	0	0	0	0	0	0	0
20/10/2015	Oct	2015	Random	kivukoni	1	0	0	0	0	0	0	0	0	0	0	0	0	0	0
20/10/2015	Oct	2015	Sentinel	kivukoni	1	0	0	0	0	0	0	0	0	0	0	0	0	0	0
21/10/2015	Oct	2015	Random	mavimba	16	0	0	0	0	0	0	0	0	0	0	0	0	0	0
21/10/2015	Oct	2015	Random	mavimba	16	0	0	0	0	0	0	0	0	0	0	0	0	0	0
21/10/2015	Oct	2015	Sentinel	mavimba	16	0	0	0	0	0	0	0	0	0	0	0	0	0	0
21/10/2015	Oct	2015	Random	mavimba	16	0	0	0	0	0	0	0	0	0	0	0	0	0	0
21/10/2015	Oct	2015	Sentinel	mavimba	16	0	0	0	0	0	0	0	0	0	0	0	0	0	0
21/10/2015	Oct	2015	Sentinel	mavimba	16	0	0	0	0	0	0	0	0	0	0	0	0	0	0
22/10/2015	Oct	2015	Sentinel	mavimba	14	0	0	0	0	0	0	0	0	0	0	0	0	0	0
22/10/2015	Oct	2015	Sentinel	mavimba	14	0	0	0	0	0	0	0	0	0	0	0	0	0	0
22/10/2015	Oct	2015	Random	mavimba	14	0	0	0	0	0	0	0	0	0	0	0	0	0	0
22/10/2015	Oct	2015	Sentinel	mavimba	14	0	0	0	0	0	0	0	0	0	0	0	0	0	0
22/10/2015	Oct	2015	Random	mavimba	14	0	0	0	0	0	0	0	0	0	0	0	0	0	0
22/10/2015	Oct	2015	Random	mavimba	14	0	0	0	0	0	0	0	0	0	0	0	0	0	0
23/10/2015	Oct	2015	Random	kivukoni	6	0	0	0	0	0	0	0	0	0	0	0	0	0	0
23/10/2015	Oct	2015	Sentinel	kivukoni	6	0	0	0	0	0	0	0	0	0	0	0	0	0	0
23/10/2015	Oct	2015	Sentinel	kivukoni	6	0	0	0	0	0	0	0	0	0	0	0	0	0	0
23/10/2015	Oct	2015	Random	kivukoni	6	0	0	0	0	0	0	0	0	0	0	0	0	0	0
23/10/2015	Oct	2015	Sentinel	kivukoni	6	0	0	0	0	0	0	0	0	0	0	0	0	0	0
23/10/2015	Oct	2015	Random	kivukoni	6	0	0	0	0	0	0	0	0	0	0	0	0	0	0
28/10/2015	Oct	2015	Random	kivukoni	3	0	0	0	0	0	0	0	0	0	0	0	0	0	0
28/10/2015	Oct	2015	Random	kivukoni	3	0	0	0	0	0	0	0	0	0	0	0	0	0	0
28/10/2015	Oct	2015	Sentinel	kivukoni	3	0	0	0	0	0	0	0	0	0	0	0	0	0	0
28/10/2015	Oct	2015	Sentinel	kivukoni	3	0	0	0	0	0	0	0	0	0	0	0	0	0	0
28/10/2015	Oct	2015	Random	kivukoni	3	0	0	0	0	0	0	0	0	0	0	0	0	0	0
28/10/2015	Oct	2015	Sentinel	kivukoni	3	0	0	0	0	0	0	0	0	0	0	0	0	0	0
29/10/2015	Oct	2015	Sentinel	kivukoni	2	0	0	0	0	0	0	0	0	0	0	0	0	0	0
29/10/2015	Oct	2015	Sentinel	kivukoni	2	0	0	0	0	0	0	0	0	0	0	0	0	0	0
29/10/2015	Oct	2015	Random	kivukoni	2	0	0	0	0	0	0	0	0	0	0	0	0	0	0
29/10/2015	Oct	2015	Random	kivukoni	2	0	0	0	0	0	0	0	0	0	0	0	0	0	0
29/10/2015	Oct	2015	Sentinel	kivukoni	2	0	0	0	0	0	0	0	0	0	0	0	0	0	0
29/10/2015	Oct	2015	Random	kivukoni	2	0	0	0	0	0	0	0	0	0	0	0	0	0	0
30/10/2015	Oct	2015	Sentinel	mavimba	15	0	0	0	0	0	0	0	0	0	0	0	0	0	0
30/10/2015	Oct	2015	Random	mavimba	15	0	0	0	0	0	0	0	0	0	0	0	0	0	0
30/10/2015	Oct	2015	Random	mavimba	15	0	0	0	0	0	0	0	0	0	0	0	0	0	0
30/10/2015	Oct	2015	Random	mavimba	15	0	0	0	0	0	0	0	0	0	0	0	0	0	0
30/10/2015	Oct	2015	Sentinel	mavimba	15	0	0	0	0	0	0	0	0	0	0	0	0	0	0
30/10/2015	Oct	2015	Sentinel	mavimba	15	0	0	0	0	0	0	0	0	0	0	0	0	0	0
31/10/2015	Oct	2015	Sentinel	kivukoni	7	0	0	0	0	0	0	0	0	0	0	0	0	0	0
31/10/2015	Oct	2015	Sentinel	kivukoni	7	0	0	0	0	0	0	0	0	0	0	0	0	0	0
31/10/2015	Oct	2015	Random	kivukoni	7	0	0	0	0	0	0	0	0	0	0	0	0	0	0
31/10/2015	Oct	2015	Random	kivukoni	7	0	0	0	0	0	0	0	0	0	0	0	0	0	0
31/10/2015	Oct	2015	Sentinel	kivukoni	7	0	0	0	0	0	0	0	0	0	0	0	0	0	0
31/10/2015	Oct	2015	Random	kivukoni	7	0	0	0	0	0	0	0	0	0	0	0	0	0	0
11/3/2015	Nov	2015	Sentinel	minepa	8	0	0	0	0	0	0	0	0	0	0	0	0	0	0
11/3/2015	Nov	2015	Sentinel	minepa	8	0	0	0	0	0	0	0	0	0	0	0	0	0	0
11/3/2015	Nov	2015	Sentinel	minepa	8	0	0	0	0	0	0	0	0	0	0	0	0	0	0
11/3/2015	Nov	2015	Random	minepa	8	0	0	0	0	0	0	0	0	0	0	0	0	0	0
11/3/2015	Nov	2015	Random	minepa	8	0	0	0	0	0	0	0	0	0	0	0	0	0	0
11/3/2015	Nov	2015	Random	minepa	8	0	0	0	0	0	0	0	0	0	0	0	0	0	0
11/4/2015	Nov	2015	Random	kivukoni	2	0	0	0	0	0	0	0	0	0	0	0	0	0	0
11/4/2015	Nov	2015	Random	kivukoni	2	0	0	0	0	0	0	0	0	0	0	0	0	0	0
11/4/2015	Nov	2015	Sentinel	kivukoni	2	0	0	0	0	0	0	0	0	0	0	0	0	0	0
11/4/2015	Nov	2015	Random	kivukoni	2	0	0	0	0	0	0	0	0	0	0	0	0	0	0
11/4/2015	Nov	2015	Sentinel	kivukoni	2	0	0	0	0	0	0	0	0	0	0	0	0	0	0
11/4/2015	Nov	2015	Sentinel	kivukoni	2	0	0	0	0	0	0	0	0	0	0	0	0	0	0
11/5/2015	Nov	2015	Sentinel	mavimba	15	0	0	0	0	0	0	0	0	0	0	0	0	0	0
11/5/2015	Nov	2015	Random	mavimba	15	0	0	0	0	0	0	0	0	0	0	0	0	0	0
11/5/2015	Nov	2015	Sentinel	mavimba	15	0	0	0	0	0	0	0	0	0	0	0	0	0	0
11/5/2015	Nov	2015	Random	mavimba	15	0	0	0	0	0	0	0	0	0	0	0	0	0	0
11/5/2015	Nov	2015	Sentinel	mavimba	15	0	0	0	0	0	0	0	0	0	0	0	0	0	0
11/5/2015	Nov	2015	Random	mavimba	15	0	0	0	0	0	0	0	0	0	0	0	0	0	0
11/6/2015	Nov	2015	Sentinel	kivukoni	1	0	0	0	0	0	0	0	0	0	0	0	0	0	0
11/6/2015	Nov	2015	Random	kivukoni	1	0	0	0	0	0	0	0	0	0	0	0	0	0	0
11/6/2015	Nov	2015	Random	kivukoni	1	0	0	0	0	0	0	0	0	0	0	0	0	0	0
11/6/2015	Nov	2015	Random	kivukoni	1	0	0	0	0	0	0	0	0	0	0	0	0	0	0
11/6/2015	Nov	2015	Sentinel	kivukoni	1	0	0	0	0	0	0	0	0	0	0	0	0	0	0
11/6/2015	Nov	2015	Sentinel	kivukoni	1	0	0	0	0	0	0	0	0	0	0	0	0	0	0
11/10/2015	Nov	2015	Sentinel	minepa	9	0	0	0	0	0	0	0	0	0	0	0	0	0	0
11/10/2015	Nov	2015	Random	minepa	9	0	0	0	0	0	0	0	0	0	0	0	0	0	0
11/10/2015	Nov	2015	Sentinel	minepa	9	0	0	0	0	0	0	0	0	0	0	0	0	0	0
11/10/2015	Nov	2015	Random	minepa	9	0	0	0	0	0	0	0	0	0	0	0	0	0	0
11/10/2015	Nov	2015	Random	minepa	9	0	0	0	0	0	0	0	0	0	0	0	0	0	0
11/10/2015	Nov	2015	Sentinel	minepa	9	0	0	0	0	0	0	0	0	0	0	0	0	0	0
11/11/2015	Nov	2015	Sentinel	minepa	10	0	0	0	0	0	0	0	0	0	0	0	0	0	0
11/11/2015	Nov	2015	Sentinel	minepa	10	0	0	0	0	0	0	0	0	0	0	0	0	0	0
11/11/2015	Nov	2015	Random	minepa	10	0	0	0	0	0	0	0	0	0	0	0	0	0	0
11/11/2015	Nov	2015	Sentinel	minepa	10	0	0	0	0	0	0	0	0	0	0	0	0	0	0
11/11/2015	Nov	2015	Random	minepa	10	0	0	0	0	0	0	0	0	0	0	0	0	0	0
11/11/2015	Nov	2015	Random	minepa	10	0	0	0	0	0	0	0	0	0	0	0	0	0	0
11/12/2015	Nov	2015	Sentinel	kivukoni	4	0	0	0	0	0	0	0	0	0	0	0	0	0	0
11/12/2015	Nov	2015	Sentinel	kivukoni	4	0	0	0	0	0	0	0	0	0	0	0	0	0	0
11/12/2015	Nov	2015	Sentinel	kivukoni	4	0	0	0	0	0	0	0	0	0	0	0	0	0	0
11/12/2015	Nov	2015	Random	kivukoni	4	0	0	0	0	0	0	0	0	0	0	0	0	0	0
11/12/2015	Nov	2015	Random	kivukoni	4	0	0	0	0	0	0	0	0	0	0	0	0	0	0
11/12/2015	Nov	2015	Random	kivukoni	4	0	0	0	0	0	0	0	0	0	0	0	0	0	0
13/11/2015	Nov	2015	Sentinel	mavimba	14	0	0	0	0	0	0	0	0	0	0	0	0	0	0
13/11/2015	Nov	2015	Sentinel	mavimba	14	0	0	0	0	0	0	0	0	0	0	0	0	0	0
13/11/2015	Nov	2015	Random	mavimba	14	0	0	0	0	0	0	0	0	0	0	0	0	0	0
13/11/2015	Nov	2015	Random	mavimba	14	0	0	0	0	0	0	0	0	0	0	0	0	0	0
13/11/2015	Nov	2015	Random	mavimba	14	0	0	0	0	0	0	0	0	0	0	0	0	0	0
13/11/2015	Nov	2015	Sentinel	mavimba	14	0	0	0	0	0	0	0	0	0	0	0	0	0	0
17/11/2015	Nov	2015	Random	mavimba	13	0	0	0	0	0	0	0	0	0	0	0	0	0	0
17/11/2015	Nov	2015	Sentinel	mavimba	13	0	0	0	0	0	0	0	0	0	0	0	0	0	0
17/11/2015	Nov	2015	Sentinel	mavimba	13	0	0	0	0	0	0	0	0	0	0	0	0	0	0
17/11/2015	Nov	2015	Random	mavimba	13	0	0	0	0	0	0	0	0	0	0	0	0	0	0
17/11/2015	Nov	2015	Random	mavimba	13	0	0	0	0	0	0	0	0	0	0	0	0	0	0
17/11/2015	Nov	2015	Sentinel	mavimba	13	0	0	0	0	0	0	0	0	0	0	0	0	0	0
18/11/2015	Nov	2015	Sentinel	minepa	11	0	0	0	0	0	0	0	0	0	0	0	0	0	0
18/11/2015	Nov	2015	Random	minepa	11	0	0	0	0	0	0	0	0	0	0	0	0	0	0
18/11/2015	Nov	2015	Sentinel	minepa	11	0	0	0	0	0	0	0	0	0	0	0	0	0	0
18/11/2015	Nov	2015	Random	minepa	11	0	0	0	0	0	0	0	0	0	0	0	0	0	0
18/11/2015	Nov	2015	Sentinel	minepa	11	0	0	0	0	0	0	0	0	0	0	0	0	0	0
18/11/2015	Nov	2015	Random	minepa	11	0	0	0	0	0	0	0	0	0	0	0	0	0	0
19/11/2015	Nov	2015	Random	kivukoni	5	0	0	0	0	0	0	0	0	0	0	0	0	0	0
19/11/2015	Nov	2015	Sentinel	kivukoni	5	0	0	0	0	0	0	0	0	0	0	0	0	0	0
19/11/2015	Nov	2015	Random	kivukoni	5	0	0	0	0	0	0	0	0	0	0	0	0	0	0
19/11/2015	Nov	2015	Sentinel	kivukoni	5	0	0	0	0	0	0	0	0	0	0	0	0	0	0
19/11/2015	Nov	2015	Random	kivukoni	5	0	0	0	0	0	0	0	0	0	0	0	0	0	0
19/11/2015	Nov	2015	Sentinel	kivukoni	5	0	0	0	0	0	0	0	0	0	0	0	0	0	0
20/11/2015	Nov	2015	Random	kivukoni	6	0	0	0	0	0	0	0	0	0	0	0	0	0	0
20/11/2015	Nov	2015	Random	kivukoni	6	0	0	0	0	0	0	0	0	0	0	0	0	0	0
20/11/2015	Nov	2015	Sentinel	kivukoni	6	0	0	0	0	0	0	0	0	0	0	0	0	0	0
20/11/2015	Nov	2015	Sentinel	kivukoni	6	0	0	0	0	0	0	0	0	0	0	0	0	0	0
20/11/2015	Nov	2015	Sentinel	kivukoni	6	0	0	0	0	0	0	0	0	0	0	0	0	0	0
20/11/2015	Nov	2015	Random	kivukoni	6	0	0	0	0	0	0	0	0	0	0	0	0	0	0
24/11/2015	Nov	2015	Random	minepa	12	0	0	0	0	0	0	0	0	0	0	0	0	0	0
24/11/2015	Nov	2015	Sentinel	minepa	12	0	0	0	0	0	0	0	0	0	0	0	0	0	0
24/11/2015	Nov	2015	Sentinel	minepa	12	0	0	0	0	0	0	0	0	0	0	0	0	0	0
24/11/2015	Nov	2015	Random	minepa	12	0	0	0	0	0	0	0	0	0	0	0	0	0	0
24/11/2015	Nov	2015	Random	minepa	12	0	0	0	0	0	0	0	0	0	0	0	0	0	0
24/11/2015	Nov	2015	Sentinel	minepa	12	0	0	0	0	0	0	0	0	0	0	0	0	0	0
25/11/2015	Nov	2015	Sentinel	mavimba	16	0	0	0	0	0	0	0	0	0	0	0	0	0	0
25/11/2015	Nov	2015	Random	mavimba	16	0	0	0	0	0	0	0	0	0	0	0	0	0	0
25/11/2015	Nov	2015	Sentinel	mavimba	16	0	0	0	0	0	0	0	0	0	0	0	0	0	0
25/11/2015	Nov	2015	Random	mavimba	16	0	0	0	0	0	0	0	0	0	0	0	0	0	0
25/11/2015	Nov	2015	Random	mavimba	16	0	0	0	0	0	0	0	0	0	0	0	0	0	0
25/11/2015	Nov	2015	Random	mavimba	16	0	0	0	0	0	0	0	0	0	0	0	0	0	0
26/11/2015	Nov	2015	Sentinel	kivukoni	7	0	0	0	0	0	0	0	0	0	0	0	0	0	0
26/11/2015	Nov	2015	Sentinel	kivukoni	7	0	0	0	0	0	0	0	0	0	0	0	0	0	0
26/11/2015	Nov	2015	Sentinel	kivukoni	7	0	0	0	0	0	0	0	0	0	0	0	0	0	0
26/11/2015	Nov	2015	Random	kivukoni	7	0	0	0	0	0	0	0	0	0	0	0	0	0	0
26/11/2015	Nov	2015	Random	kivukoni	7	0	0	0	0	0	0	0	0	0	0	0	0	0	0
26/11/2015	Nov	2015	Random	kivukoni	7	0	0	0	0	0	0	0	0	0	0	0	0	0	0
27/11/2015	Nov	2015	Sentinel	kivukoni	3	0	0	0	0	0	0	0	0	0	0	0	0	0	0
27/11/2015	Nov	2015	Random	kivukoni	3	0	0	0	0	0	0	0	0	0	0	0	0	0	0
27/11/2015	Nov	2015	Random	kivukoni	3	0	0	0	0	0	0	0	0	0	0	0	0	0	0
27/11/2015	Nov	2015	Sentinel	kivukoni	3	0	0	0	0	0	0	0	0	0	0	0	0	0	0
27/11/2015	Nov	2015	Random	kivukoni	3	0	0	0	0	0	0	0	0	0	0	0	0	0	0
27/11/2015	Nov	2015	Sentinel	kivukoni	3	0	0	0	0	0	0	0	0	0	0	0	0	0	0
12/2/2015	Dec	2015	Random	kivukoni	4	0	0	0	0	0	0	0	0	0	0	0	0	0	2.816901408
12/2/2015	Dec	2015	Sentinel	kivukoni	4	0	0	0	0	0	0	0	0	0	0	0	0	0	2.816901408
12/2/2015	Dec	2015	Random	kivukoni	4	0	0	0	0	0	0	0	0	0	0	0	0	0	2.816901408
12/2/2015	Dec	2015	Random	kivukoni	4	0	0	0	0	0	0	0	0	0	0	0	0	0	2.816901408
12/2/2015	Dec	2015	Sentinel	kivukoni	4	0	0	0	0	0	0	0	0	0	0	0	0	0	2.816901408
12/2/2015	Dec	2015	Sentinel	kivukoni	4	0	0	0	0	0	0	0	0	0	0	0	0	0	2.816901408
12/3/2015	Dec	2015	Random	mavimba	15	0	0	0	0	0	0	0	0	0	0	0	0	0	2.816901408
12/3/2015	Dec	2015	Sentinel	mavimba	15	0	0	0	0	0	0	0	0	0	0	0	0	0	2.816901408
12/3/2015	Dec	2015	Sentinel	mavimba	15	0	0	0	0	0	0	0	0	0	0	0	0	0	2.816901408
12/3/2015	Dec	2015	Sentinel	mavimba	15	0	0	0	0	0	0	0	0	0	0	0	0	0	2.816901408
12/3/2015	Dec	2015	Random	mavimba	15	0	0	0	0	0	0	0	0	0	0	0	0	0	2.816901408
12/3/2015	Dec	2015	Random	mavimba	15	0	0	0	0	0	0	0	0	0	0	0	0	0	2.816901408
12/4/2015	Dec	2015	Random	minepa	9	0	0	0	0	0	0	0	0	0	0	0	0	0	2.816901408
12/4/2015	Dec	2015	Random	minepa	9	0	0	0	0	0	0	0	0	0	0	0	0	0	2.816901408
12/4/2015	Dec	2015	Sentinel	minepa	9	0	0	0	0	0	0	0	0	0	0	0	0	0	2.816901408
12/4/2015	Dec	2015	Random	minepa	9	0	0	0	0	0	0	0	0	0	0	0	0	0	2.816901408
12/4/2015	Dec	2015	Sentinel	minepa	9	0	0	0	0	0	0	0	0	0	0	0	0	0	2.816901408
12/4/2015	Dec	2015	Random	minepa	9	0	0	0	0	0	0	0	0	0	0	0	0	0	2.816901408
12/5/2015	Dec	2015	Sentinel	minepa	12	2	0	0	0	0	0	0	0	0	0	0	0	0	2.816901408
12/5/2015	Dec	2015	Random	minepa	12	0	0	0	0	0	0	0	0	0	0	0	0	0	2.816901408
12/5/2015	Dec	2015	Sentinel	minepa	12	0	0	0	0	0	0	0	0	0	0	0	0	0	2.816901408
[truncated: 63 more rows]
